# Supplementary material for: An environmentally benign regioselective synthesis of 2-benzyl-4-arylquinoline derivatives using aryl amines, styrene oxides and aryl acetylenes
Source: Royal Society of Chemistry journal article supplement (doi:10.1039/d1ob01699g), 2021-01-01

*Electronic Supporting Information*

**An environmentally benign regioselective synthesis of 2-benzyl-4-arylquinoline derivatives using aryl amines, styrene oxides and aryl acetylenes**

Saghir Ali and Abu T. Khan\*

*Department of Chemistry, Indian Institute of Technology Guwahati, Guwahati-781039, Assam, India.*

Tel.: +91 361 2582305, Fax: +91 361 2582349

Corresponding Author: [atk@iitg.ac.in](mailto:atk@iitg.ac.in)

|                                                                                              |               |
|----------------------------------------------------------------------------------------------|---------------|
| <b>Title page</b>                                                                            | <b>S1</b>     |
| <b>Copies of <sup>1</sup>H NMR, <sup>13</sup>C NMR and HRMS spectra of all the Compounds</b> | <b>S2–S82</b> |

### <sup>1</sup>H NMR spectrum of compound: 4a

ATK-SA-4OME-ST-AC-A-1H  
ATK-SA-4OME-ST-AC-A-1H

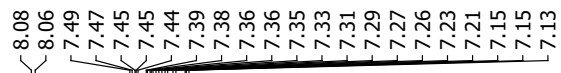

— 4.34

— 3.77

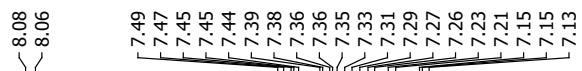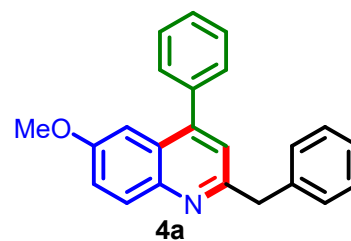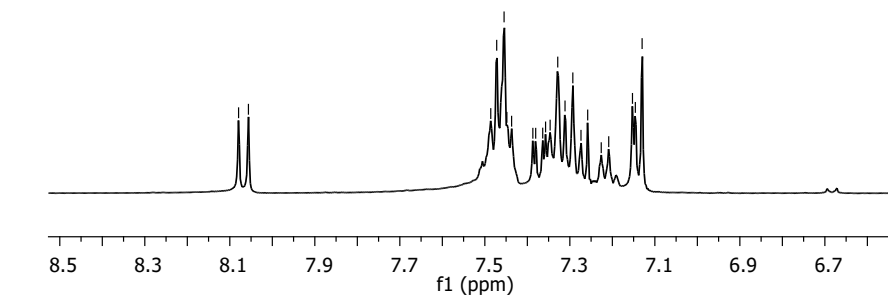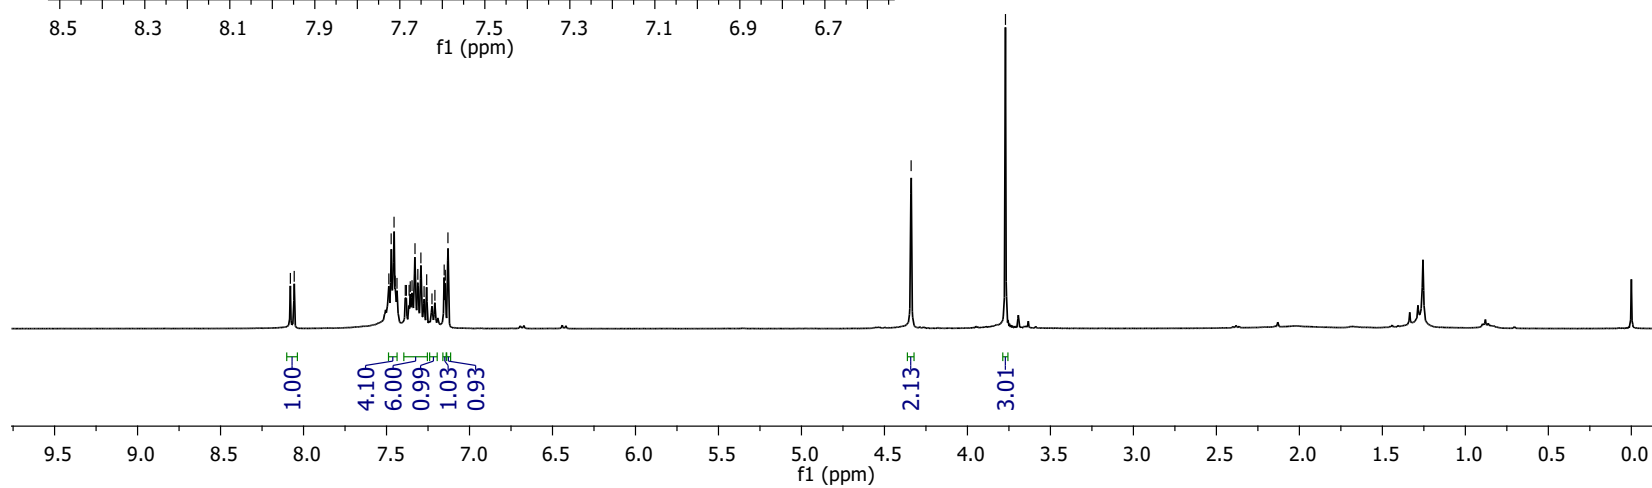

### <sup>13</sup>C NMR spectrum of compound: 4a

ATK-SA-4OME-ST-AC-A-13C  
ATK-SA-4OME-ST-AC-A-13C

158.45  
157.73

147.87  
144.46

139.63  
138.62

130.92  
129.51

129.39  
128.81

128.79  
128.47

126.62  
126.41

122.27  
121.72

104.06

77.55  
77.23  
76.91

55.64

45.44

130.92

129.51  
129.39

128.81  
128.79

128.47

126.62  
126.41

122.27  
121.72

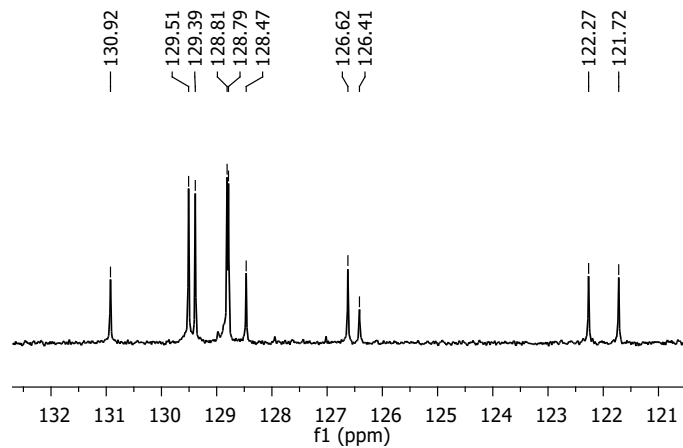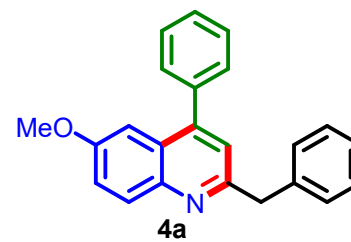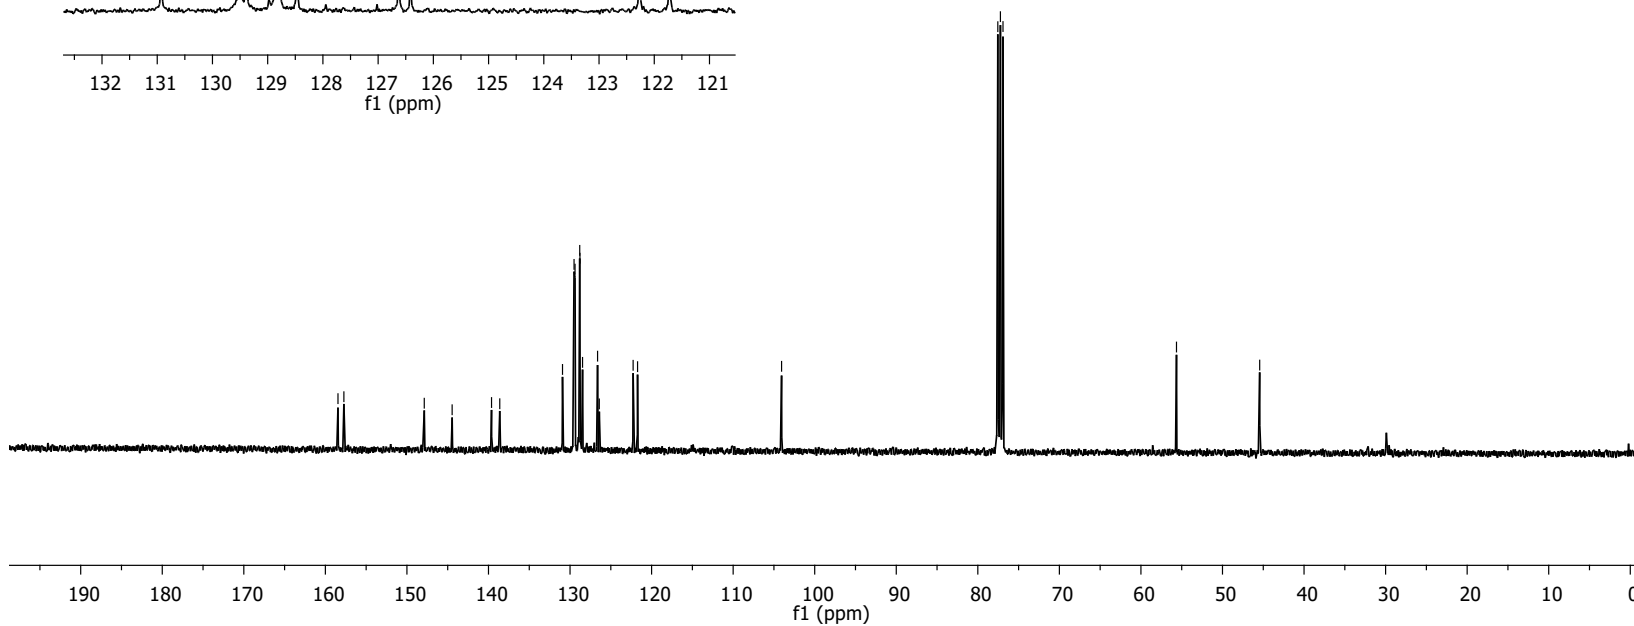

## HRMS spectrum of compound: 4a

|                    |                    |                               |         |                        |                                 |
|--------------------|--------------------|-------------------------------|---------|------------------------|---------------------------------|
| <b>Sample Name</b> | ATK-SA-4-OME-ST-AC | <b>Position</b>               | P1-B3   | <b>Instrument Name</b> | Instrument 1                    |
| <b>User Name</b>   |                    | <b>Inj Vol</b>                | 20      | <b>InjPosition</b>     |                                 |
| <b>Sample Type</b> | Sample             | <b>IRM Calibration Status</b> | Success | <b>Data Filename</b>   | ATK-SA-4-OME-ST-AC.d            |
| <b>ACQ Method</b>  | ESI ALS 100-1000.m | <b>Comment</b>                |         | <b>Acquired Time</b>   | 20-01-2021 13:35:13 (UTC+05:30) |

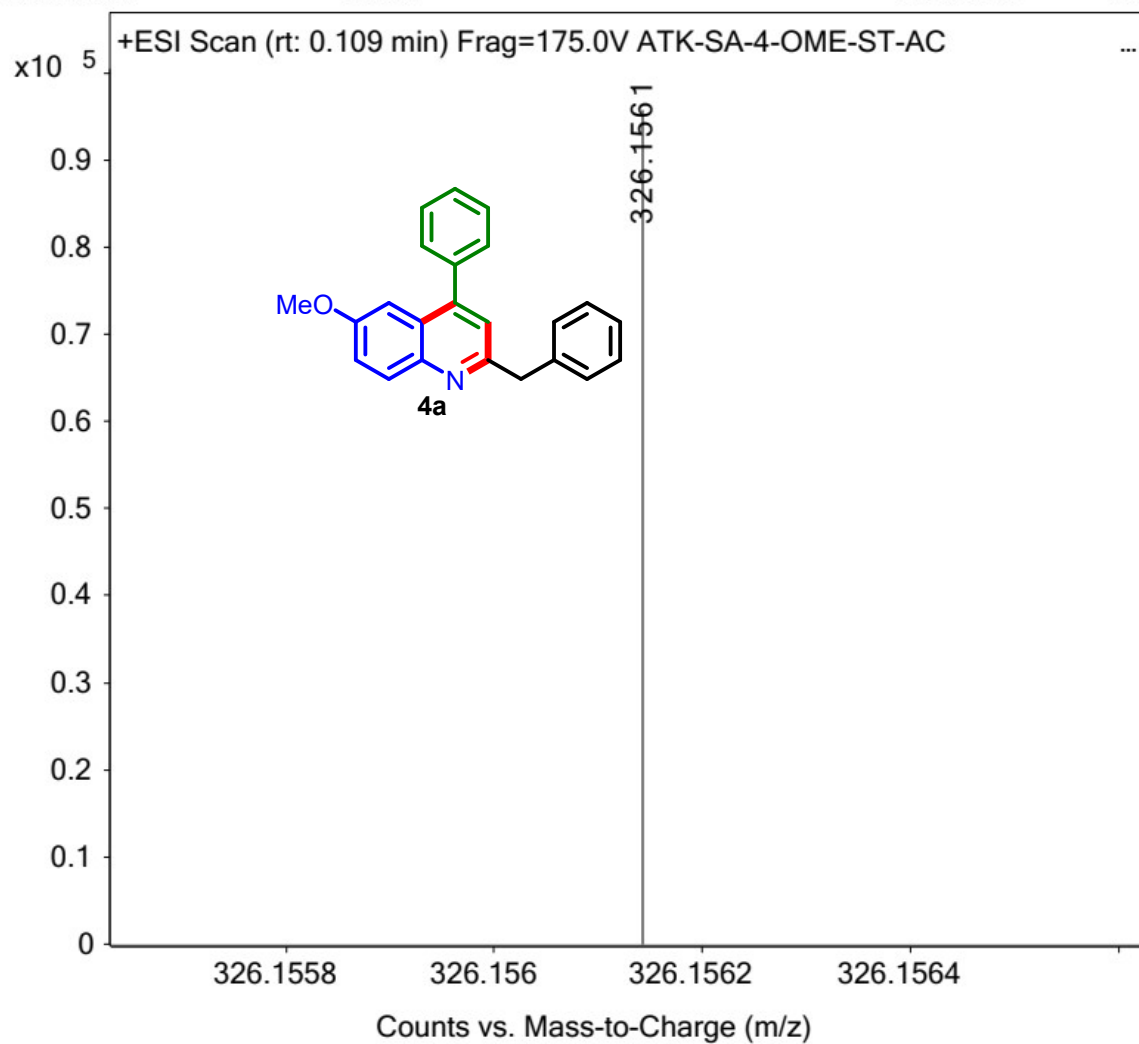

**<sup>1</sup>H NMR spectrum of compound: 4b**

SA-AN-5110-01  
8.115  
8.115  
7.866  
7.85  
7.71  
7.71  
7.70  
7.49  
7.48  
7.48  
7.47  
7.47  
7.47  
7.46  
7.45  
7.45  
7.45  
7.44  
7.44  
7.44  
7.43  
7.43  
7.42  
7.36  
7.34  
7.31  
7.30  
7.28  
7.21  
7.18

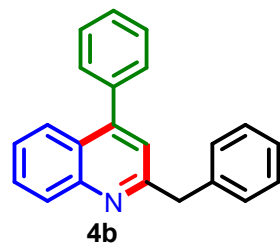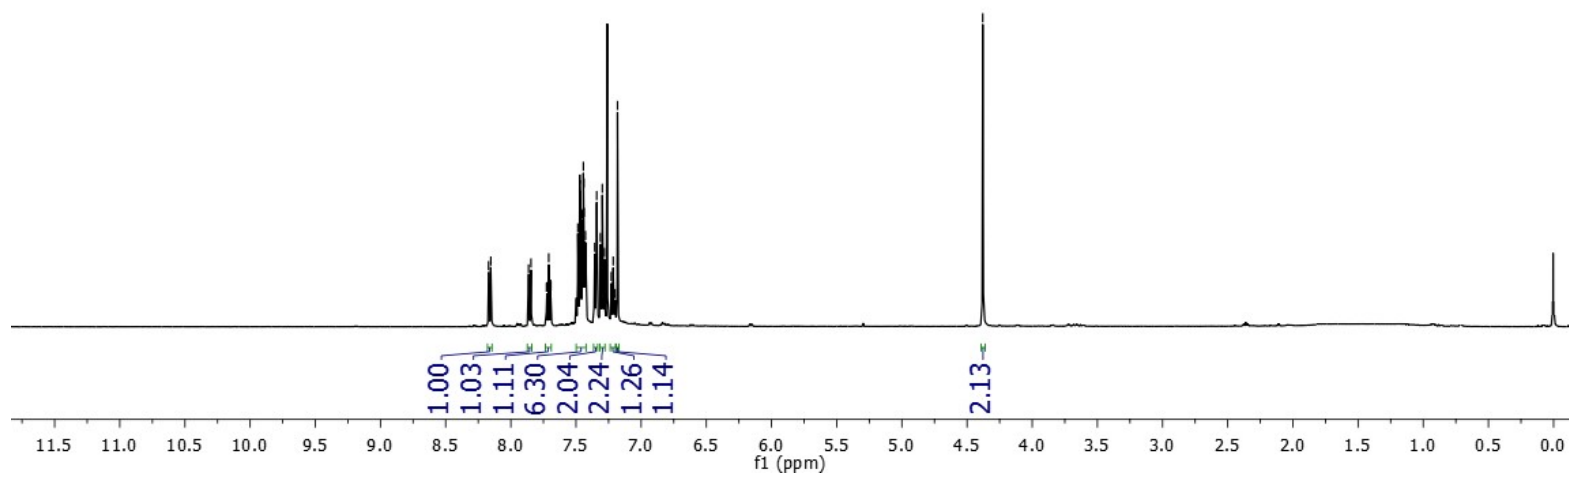

<sup>13</sup>C NMR spectrum of compound: 4b

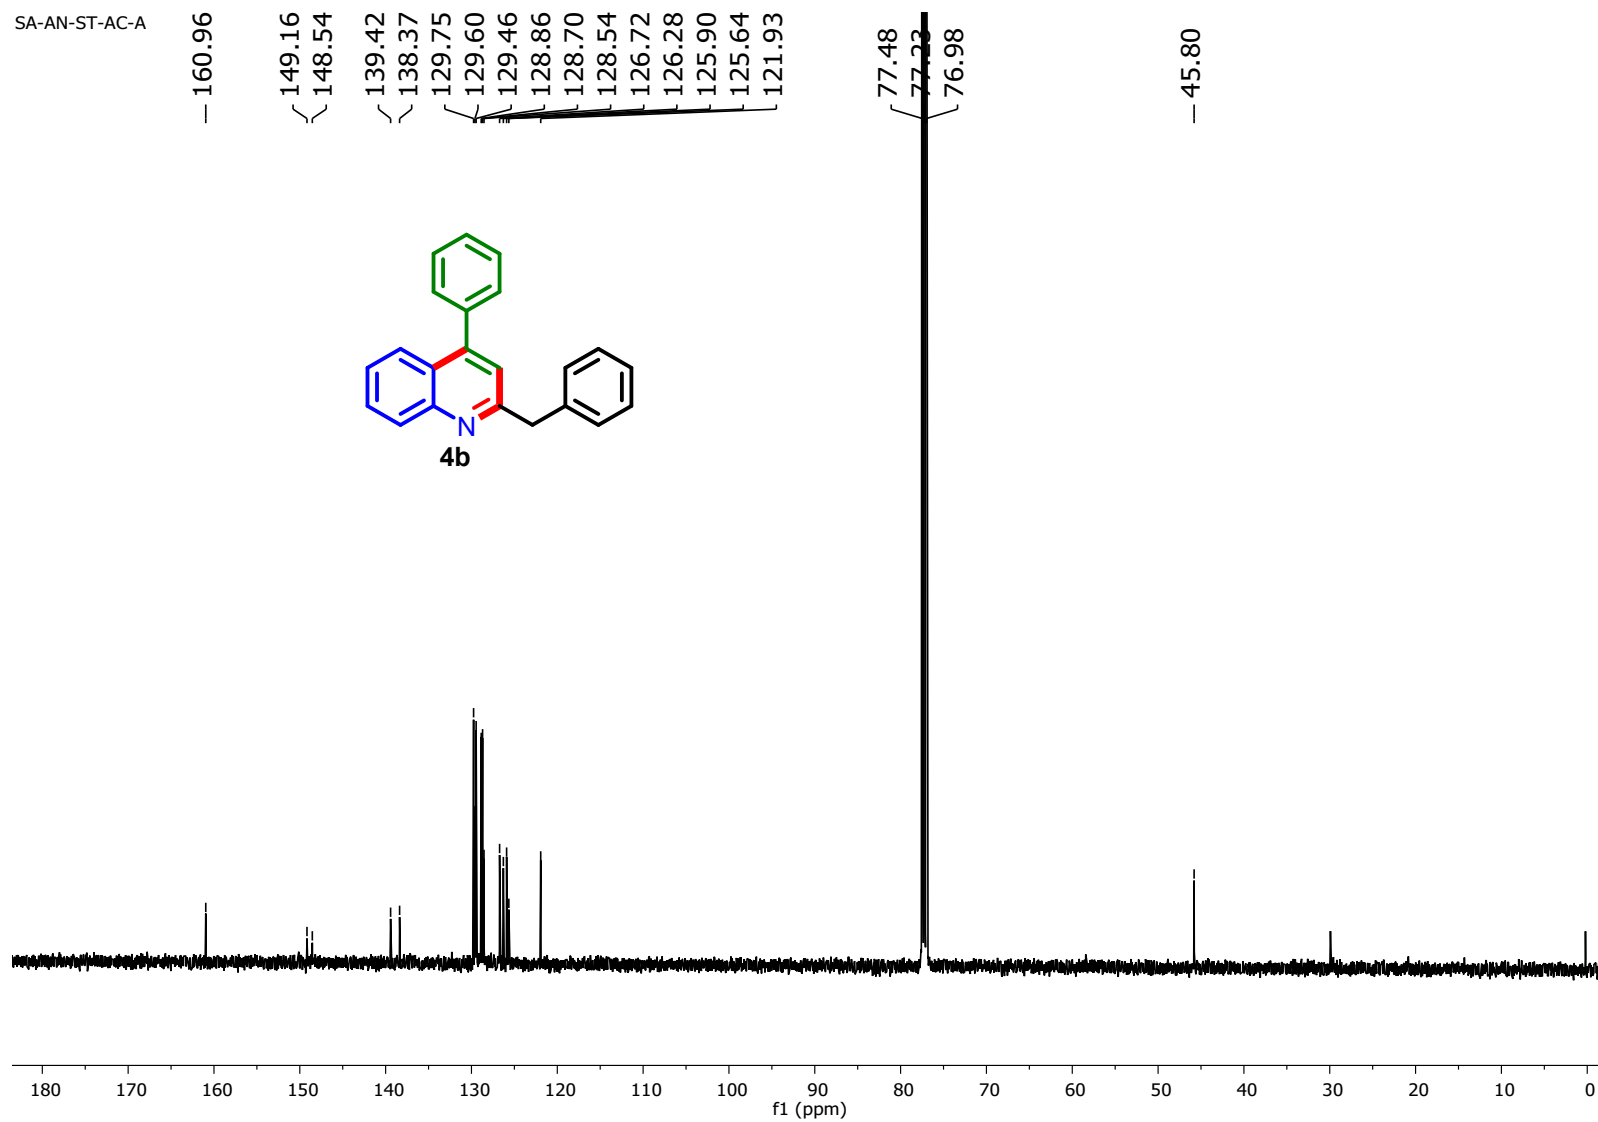

**HRMS spectrum of compound: 4b**

|                      |         |                    |                    |                        |              |                               |                      |
|----------------------|---------|--------------------|--------------------|------------------------|--------------|-------------------------------|----------------------|
| <b>Sample Name</b>   | SA-AN   | <b>Position</b>    | P1-B10             | <b>Instrument Name</b> | Instrument 1 | <b>User Name</b>              |                      |
| <b>Inj Vol</b>       | 5       | <b>InjPosition</b> |                    | <b>SampleType</b>      | Sample       | <b>IRM Calibration Status</b> | Success              |
| <b>Data Filename</b> | SA-BN.d | <b>ACQ Method</b>  | ESI ALS 100-1000.m | <b>Comment</b>         |              | <b>Acquired Time</b>          | 7/28/2021 2:37:43 PM |

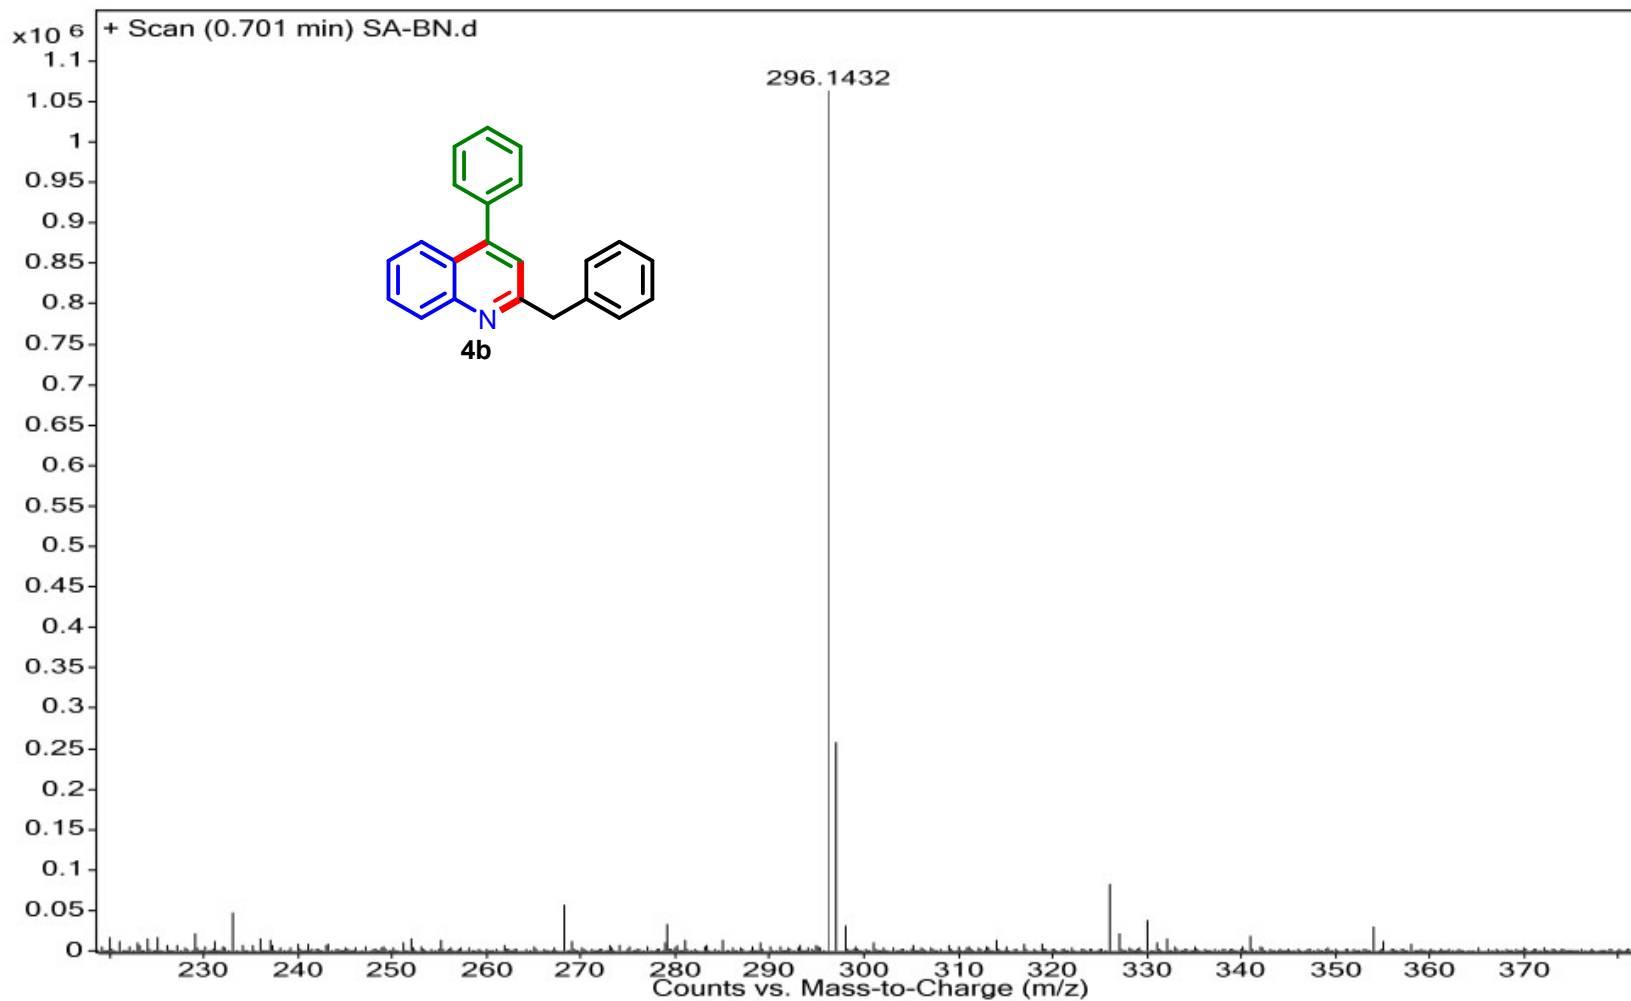



# <sup>1</sup>H NMR spectrum of compound: 4c

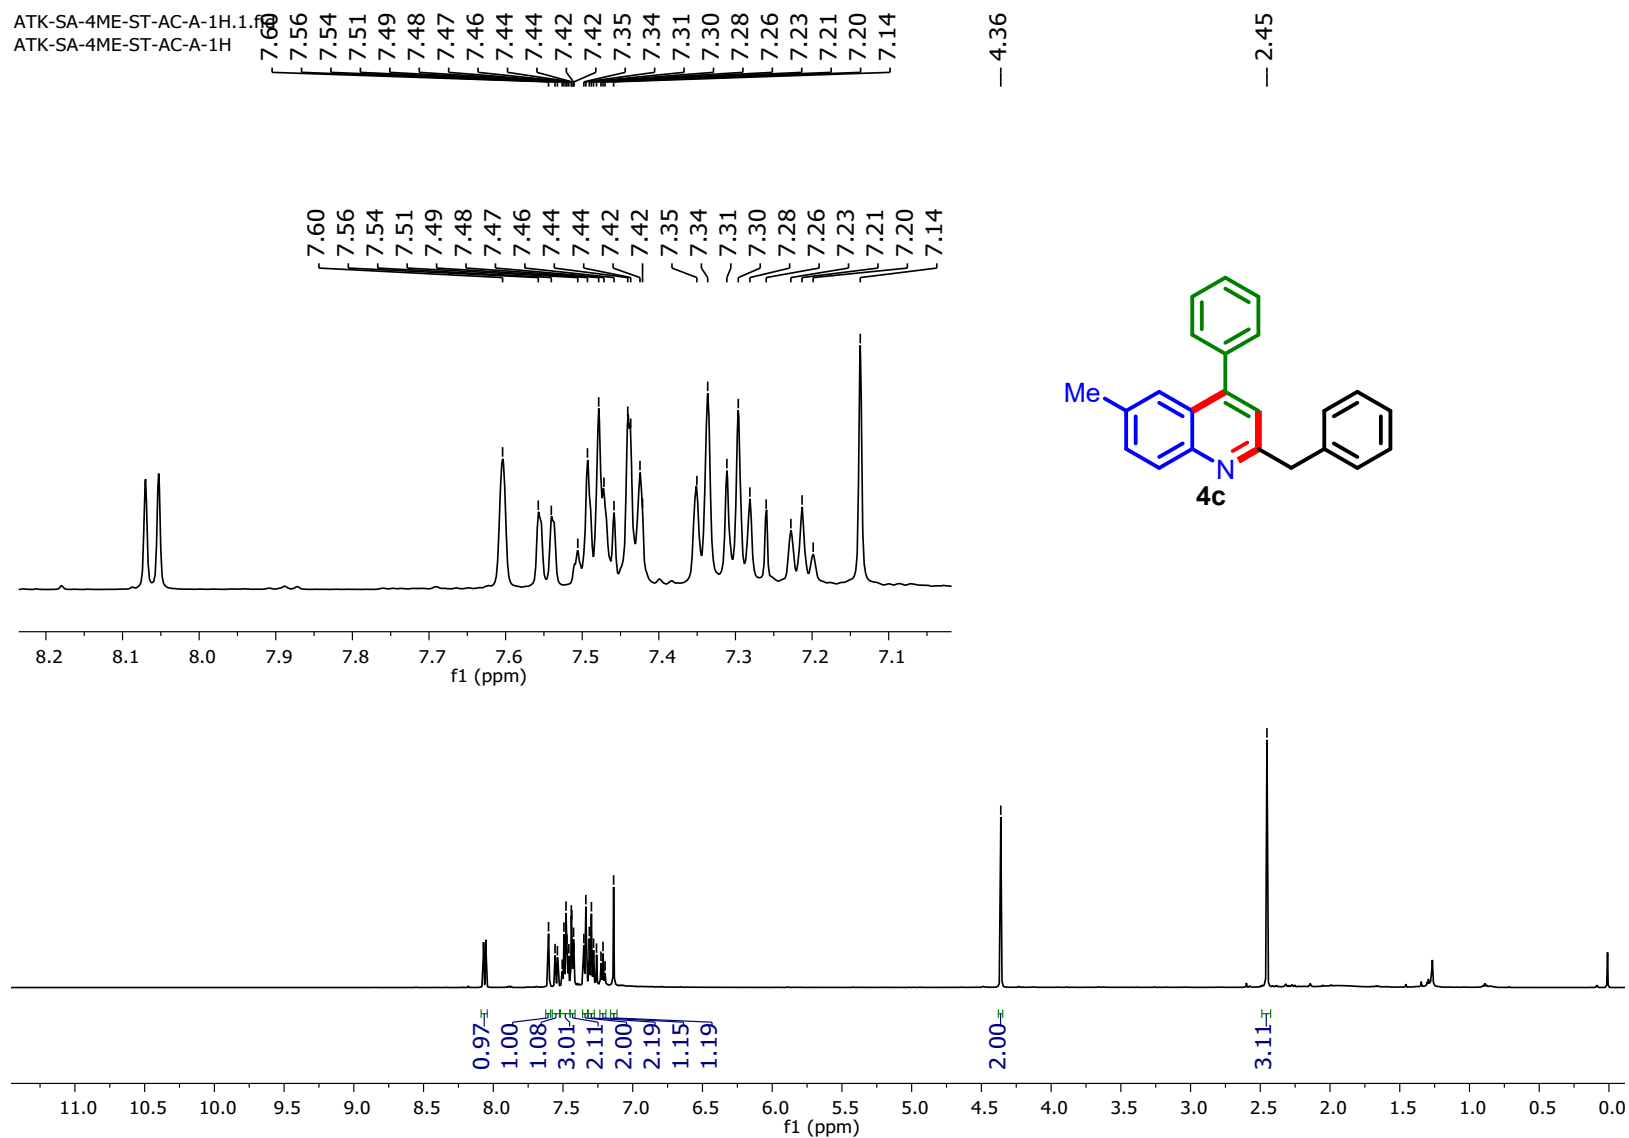

**<sup>13</sup>C NMR spectrum of compound: 4c**

ATK-SA-4Me-ST-AC-AC

— 159.94  
~ 148.44  
~ 147.03  
/ 139.53  
/ 138.54  
~ 136.13  
— 131.79  
~ 129.71  
~ 129.42  
~ 129.25  
~ 128.81  
~ 128.67  
~ 128.40  
~ 126.64  
~ 125.53  
~ 124.64  
~ 121.98  
  
77.49  
77.23  
76.98  
  
— 45.66  
  
— 21.94

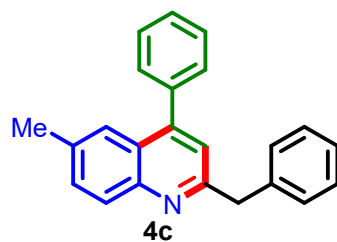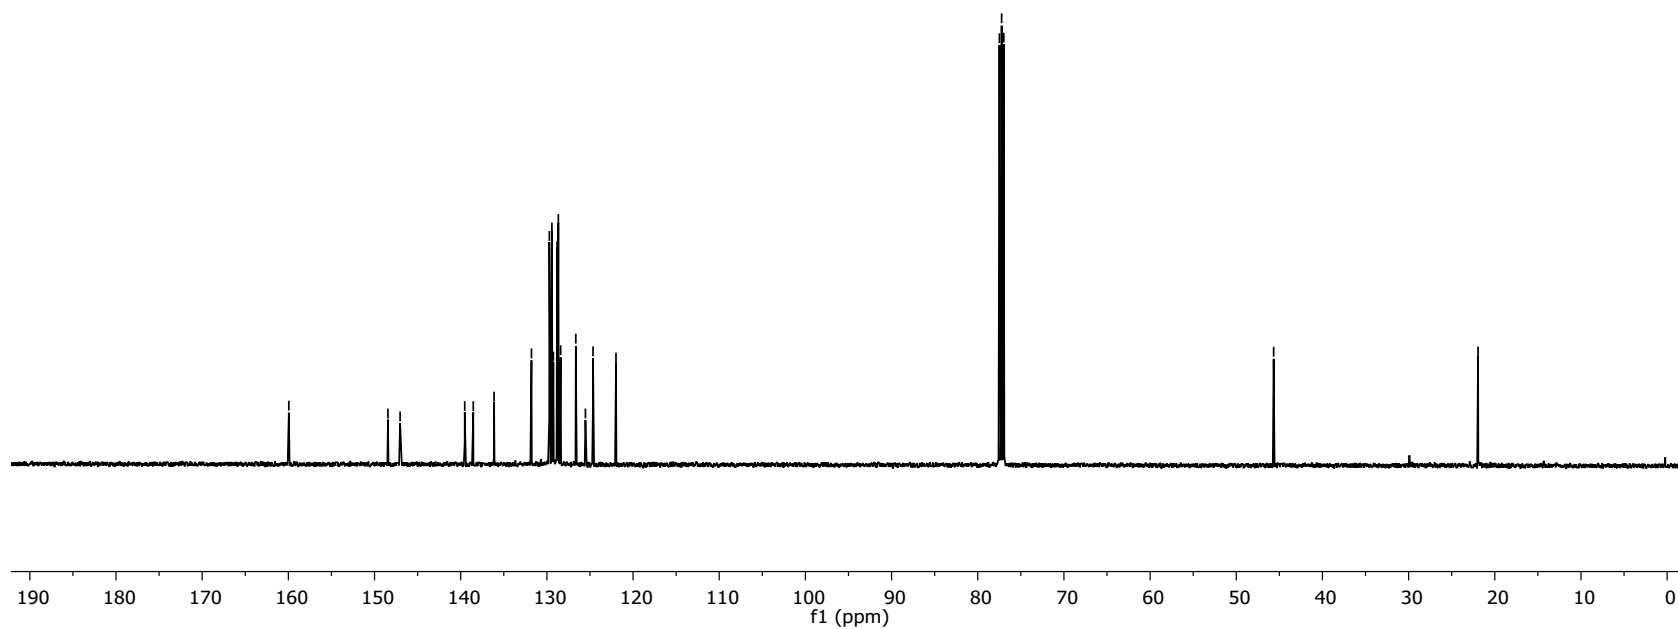

### HRMS spectrum of compound: 4c

|               |                   |             |                   |                 |              |                        |                       |
|---------------|-------------------|-------------|-------------------|-----------------|--------------|------------------------|-----------------------|
| Sample Name   | SAMPLE 11         | Position    | P1-A8             | Instrument Name | Instrument 1 | User Name              |                       |
| Inj Vol       | 20                | InjPosition |                   | SampleType      | Sample       | IRM Calibration Status | Success               |
| Data Filename | SA-4ME-ST-AC-1R.d | ACQ Method  | ESI ALS 100-500.m | Comment         |              | Acquired Time          | 2/11/2021 12:39:30 PM |

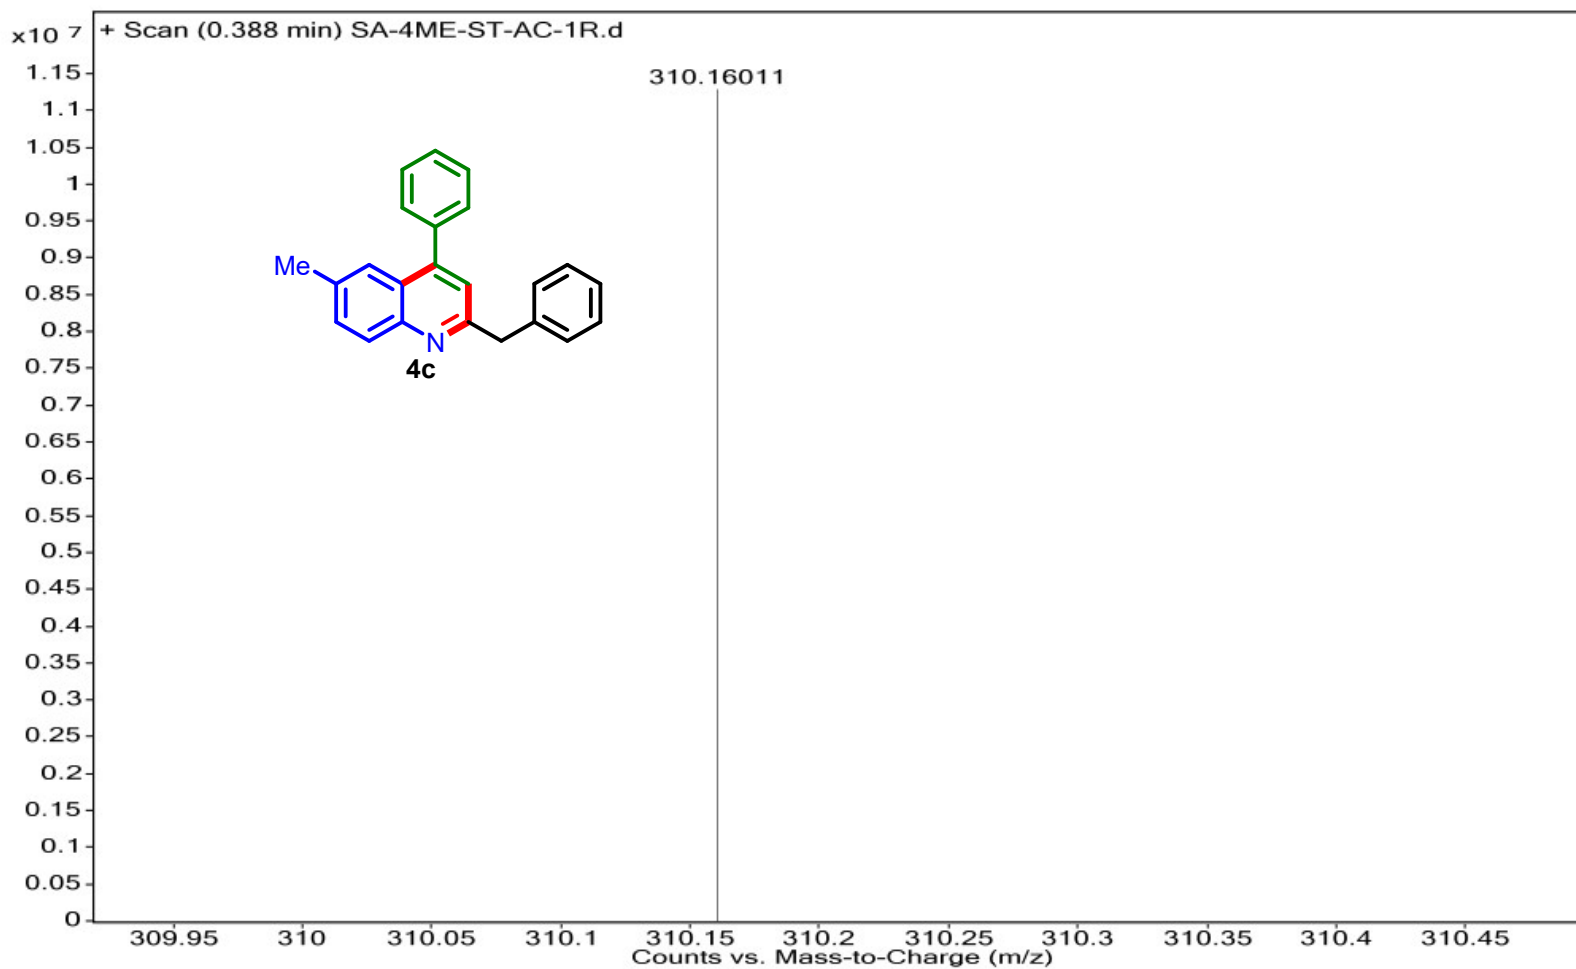

**<sup>1</sup>H NMR spectrum of compound: 4d**

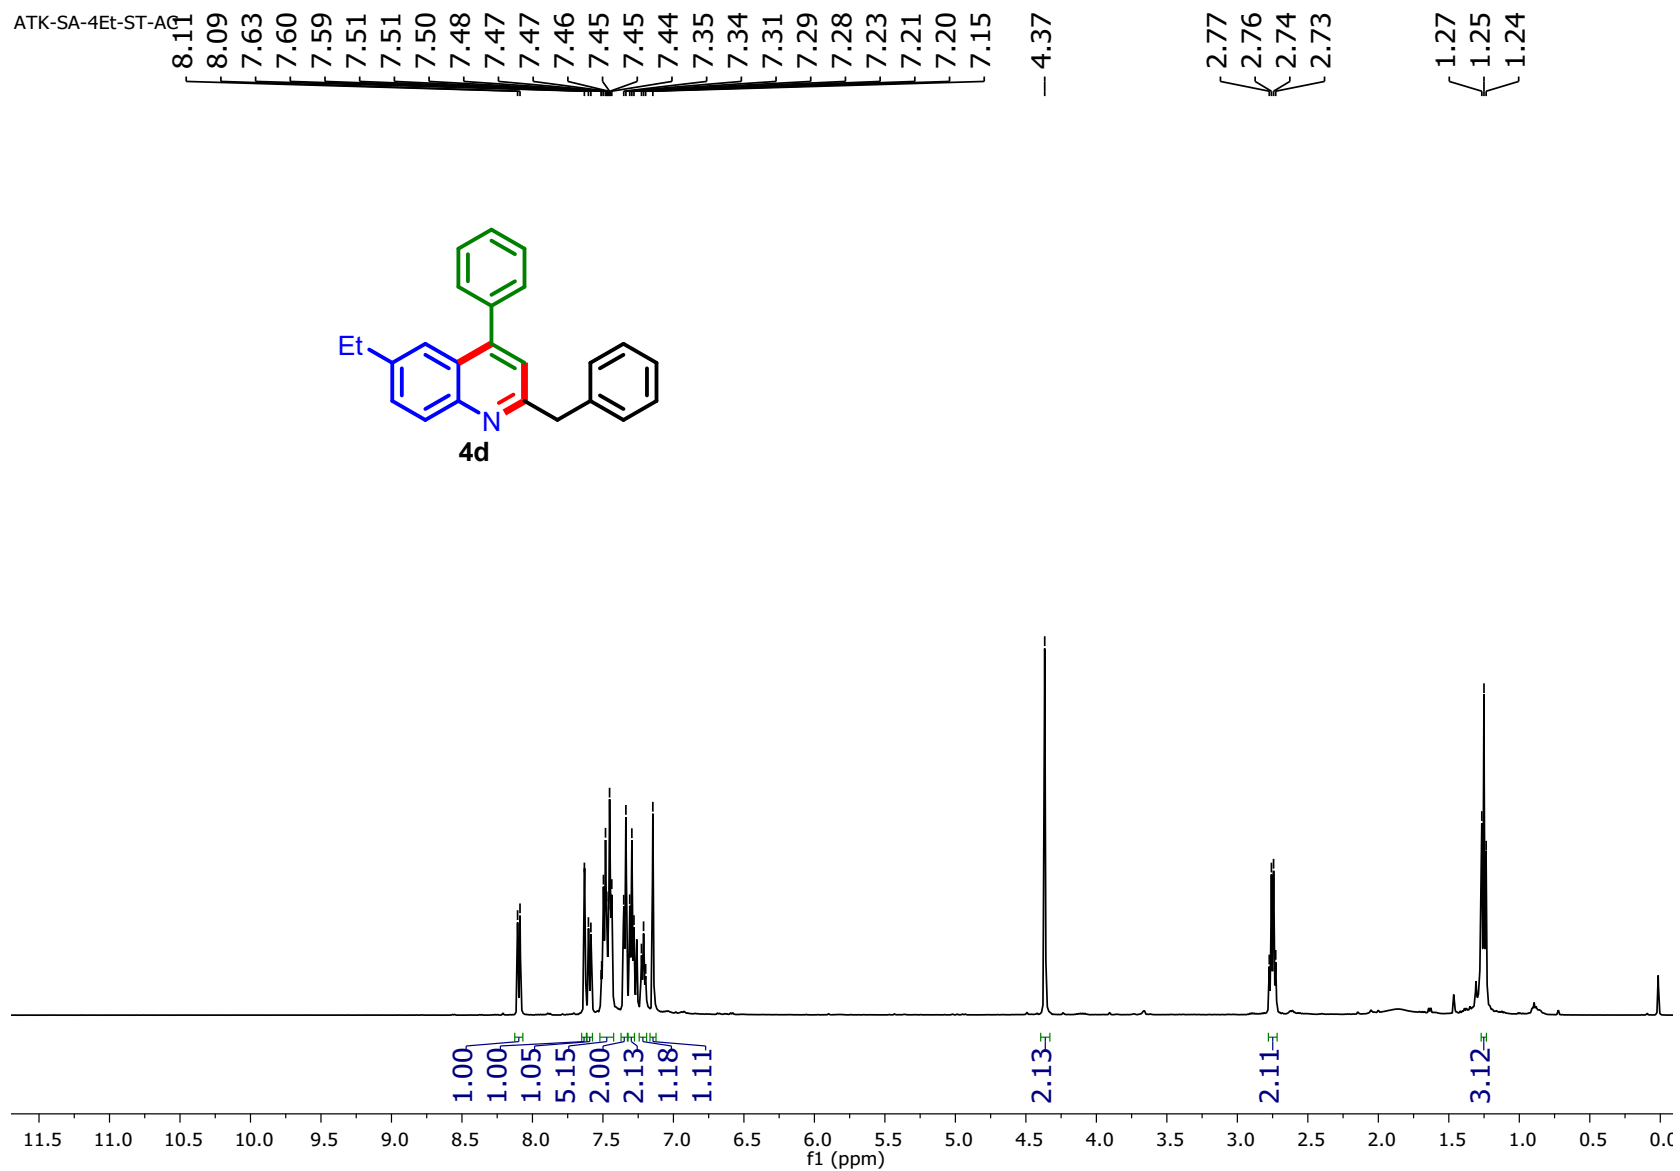

<sup>13</sup>C NMR spectrum of compound: 4d

ATK-SA-4Et-ST-AC-13C

— 160.01  
148.58  
147.29  
142.42  
139.57  
138.59  
130.62  
129.72  
129.45  
129.40  
128.80  
128.67  
128.40  
126.63  
125.55  
123.48  
121.98  
77.48  
77.23  
76.98  
— 45.69  
— 29.27  
— 15.83

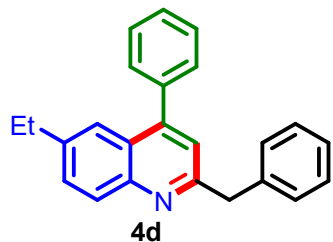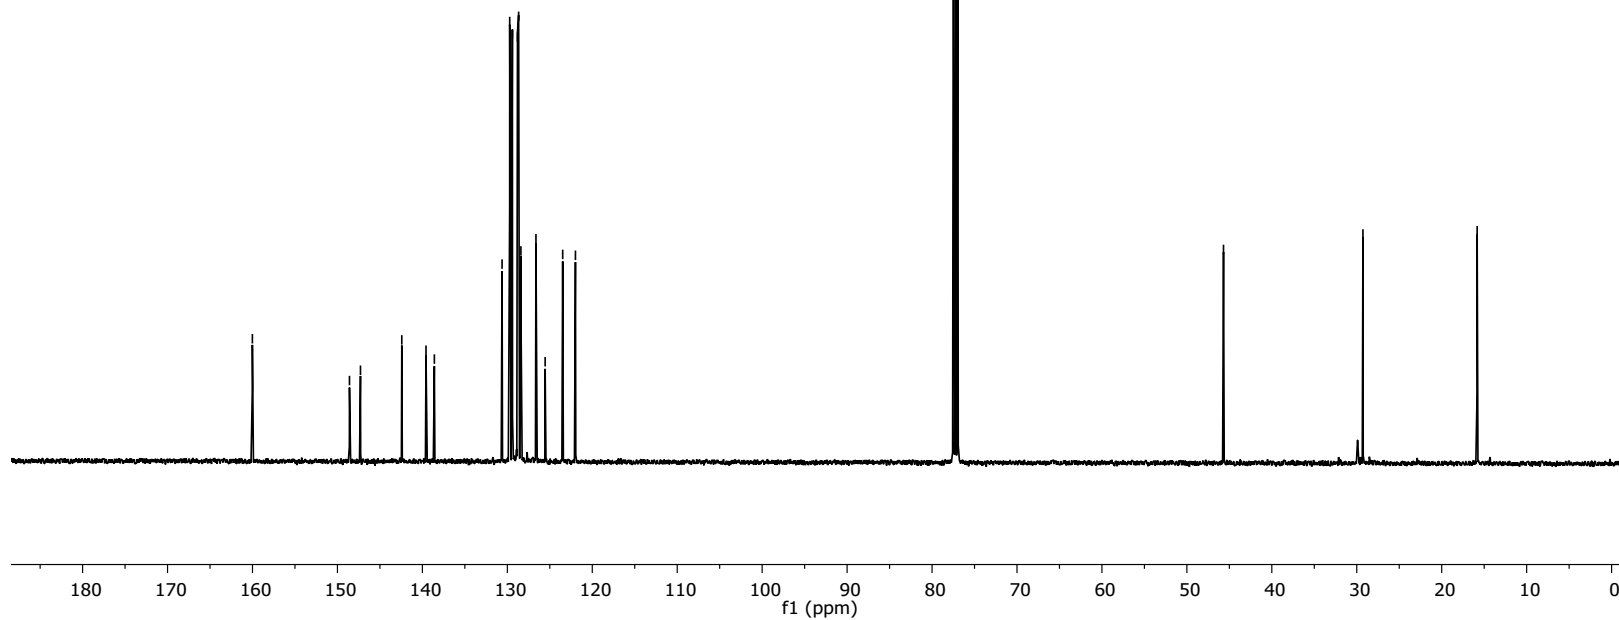

**HRMS spectrum of compound: 4d**

Sample Name  
Inj Vol  
Data Filename

Position  
InjPosition  
ACQ Method

Instrument Name  
SampleType  
Comment

User Name  
IRM Calibration Status  
Acquired Time

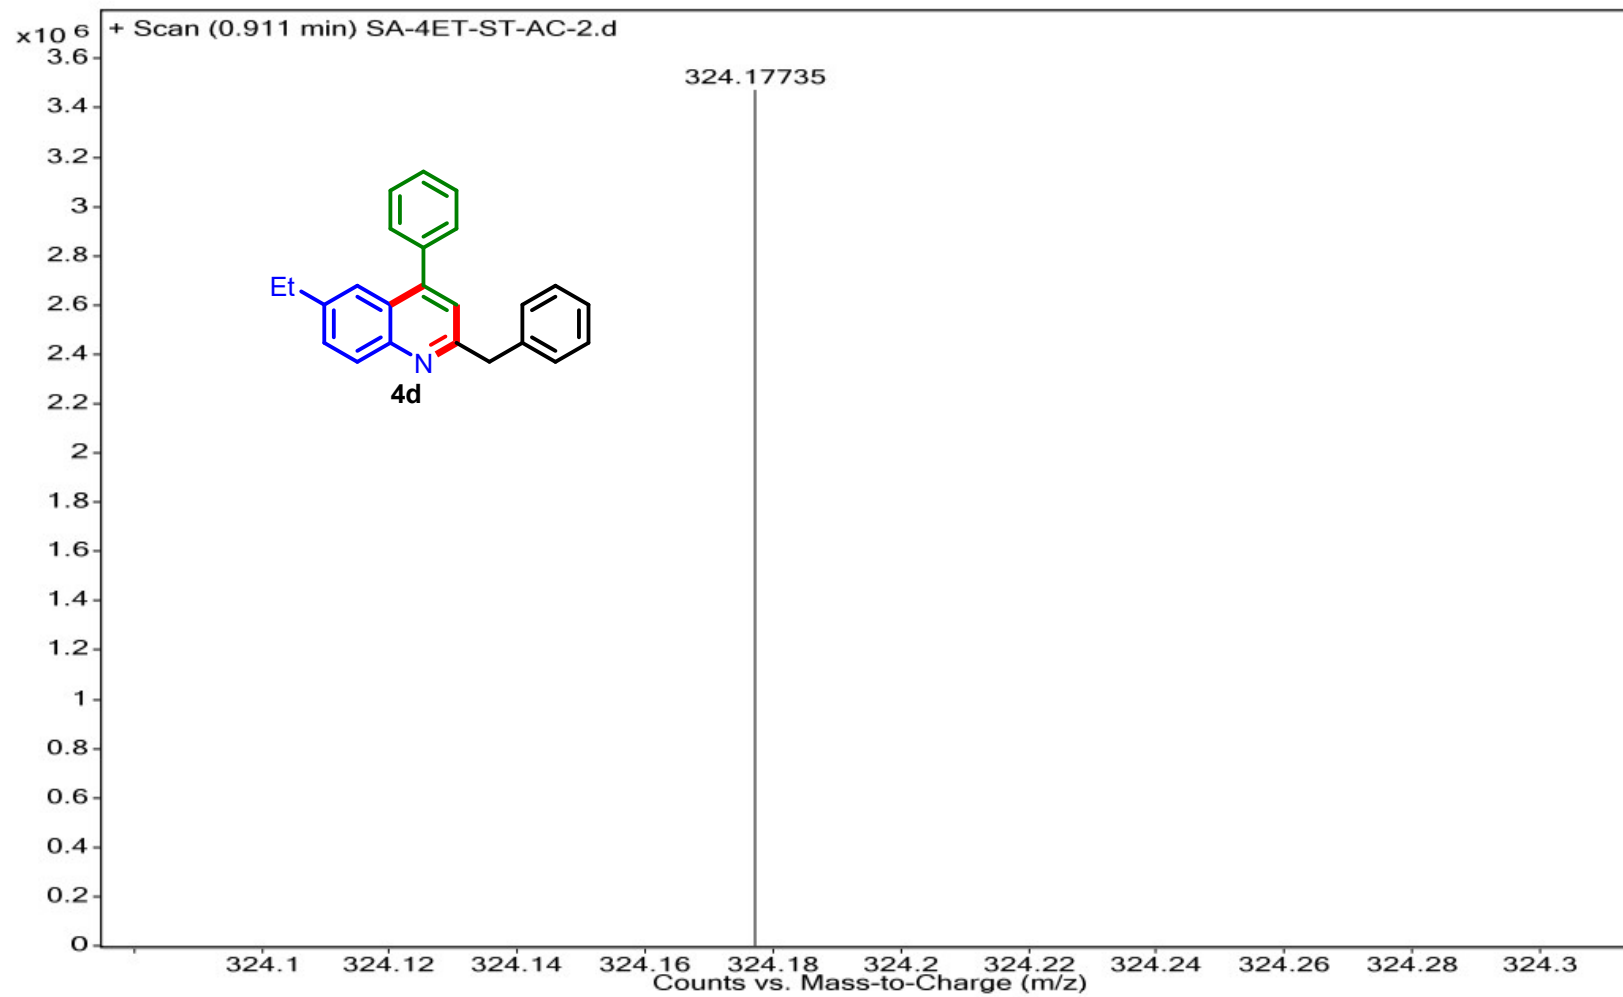

**<sup>1</sup>H NMR spectrum of compound: 4e**

ATK-SA-3,4 ME-ST-AC-B-1H  
ATK-SA-3,4 ME-ST-AC-B-1H

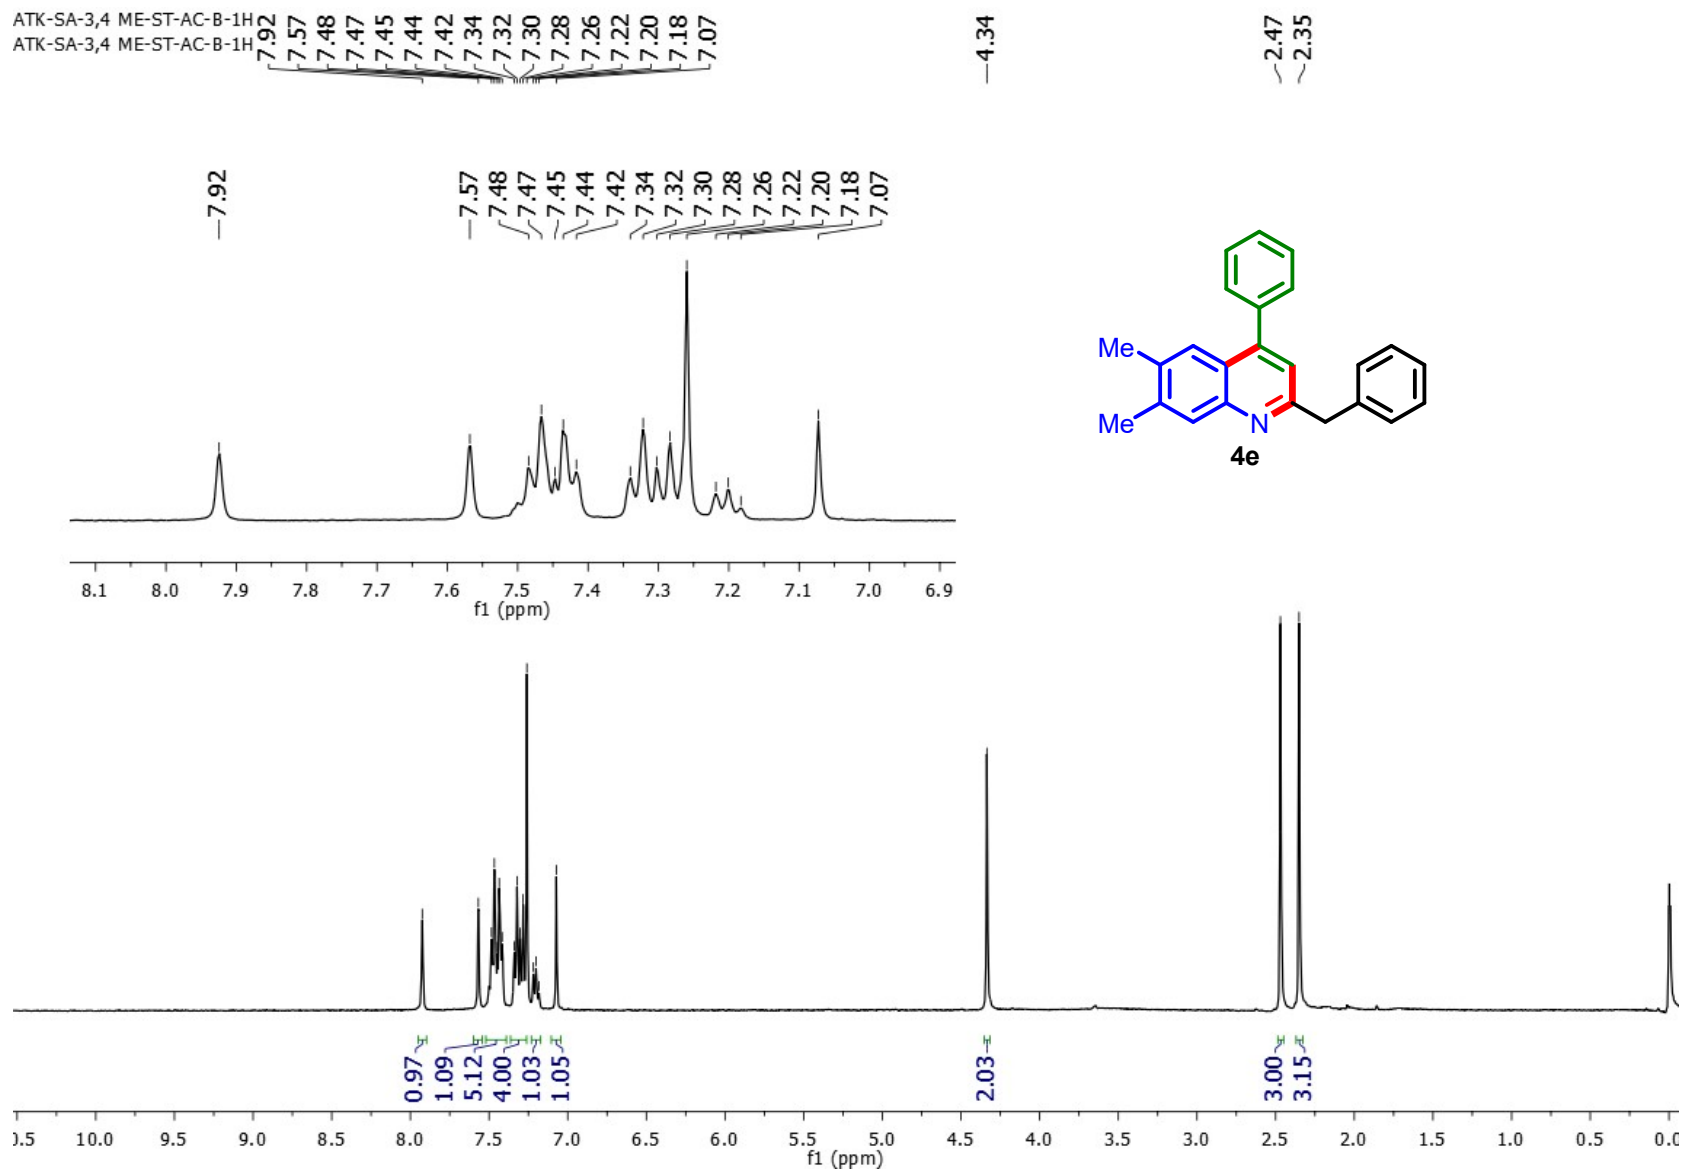



### <sup>13</sup>C NMR spectrum of compound: 4e

ATK-SA-34ME-ST-AC-B-13C  
ATK-SA-34ME-ST-AC-B-13C

159.90  
148.24  
139.79  
139.65  
138.70  
136.14  
131.81  
129.70  
129.41  
129.00  
128.79  
128.65  
128.35  
126.60  
125.00  
124.02  
121.22

77.55  
77.00  
76.91

45.69

20.50  
20.37

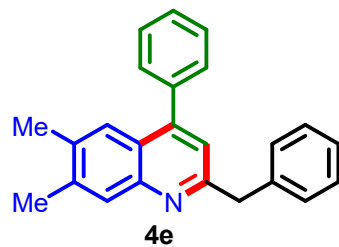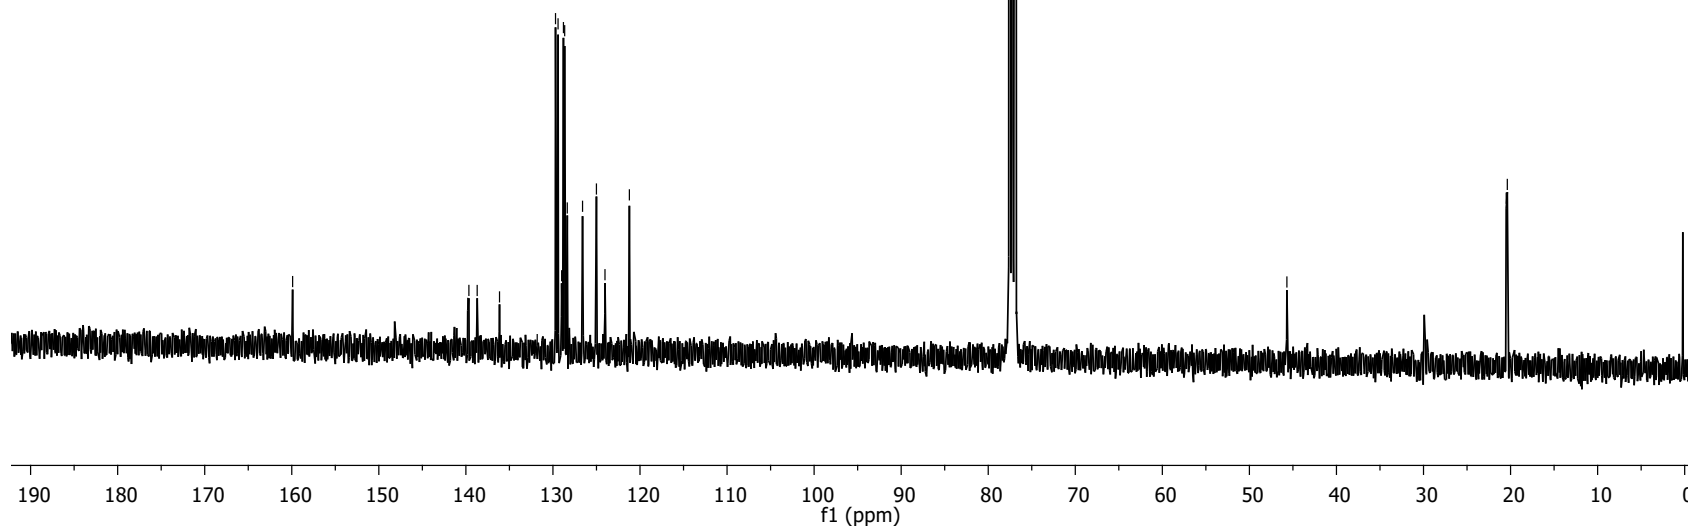

### HRMS spectrum of compound: 4e

|               |                      |             |                    |                 |              |                        |                      |
|---------------|----------------------|-------------|--------------------|-----------------|--------------|------------------------|----------------------|
| Sample Name   | ATK-SA-3,4-ME-ST-AC- | Position    | P1-A4              | Instrument Name | Instrument 1 | User Name              |                      |
| Inj Vol       | 20                   | InjPosition |                    | SampleType      | Sample       | IRM Calibration Status | Success              |
| Data Filename | ATK-SA-3,4-ME-ST-AC- | ACQ Method  | ESI ALS 100-1000.m | Comment         |              | Acquired Time          | 2/3/2021 11:22:53 AM |

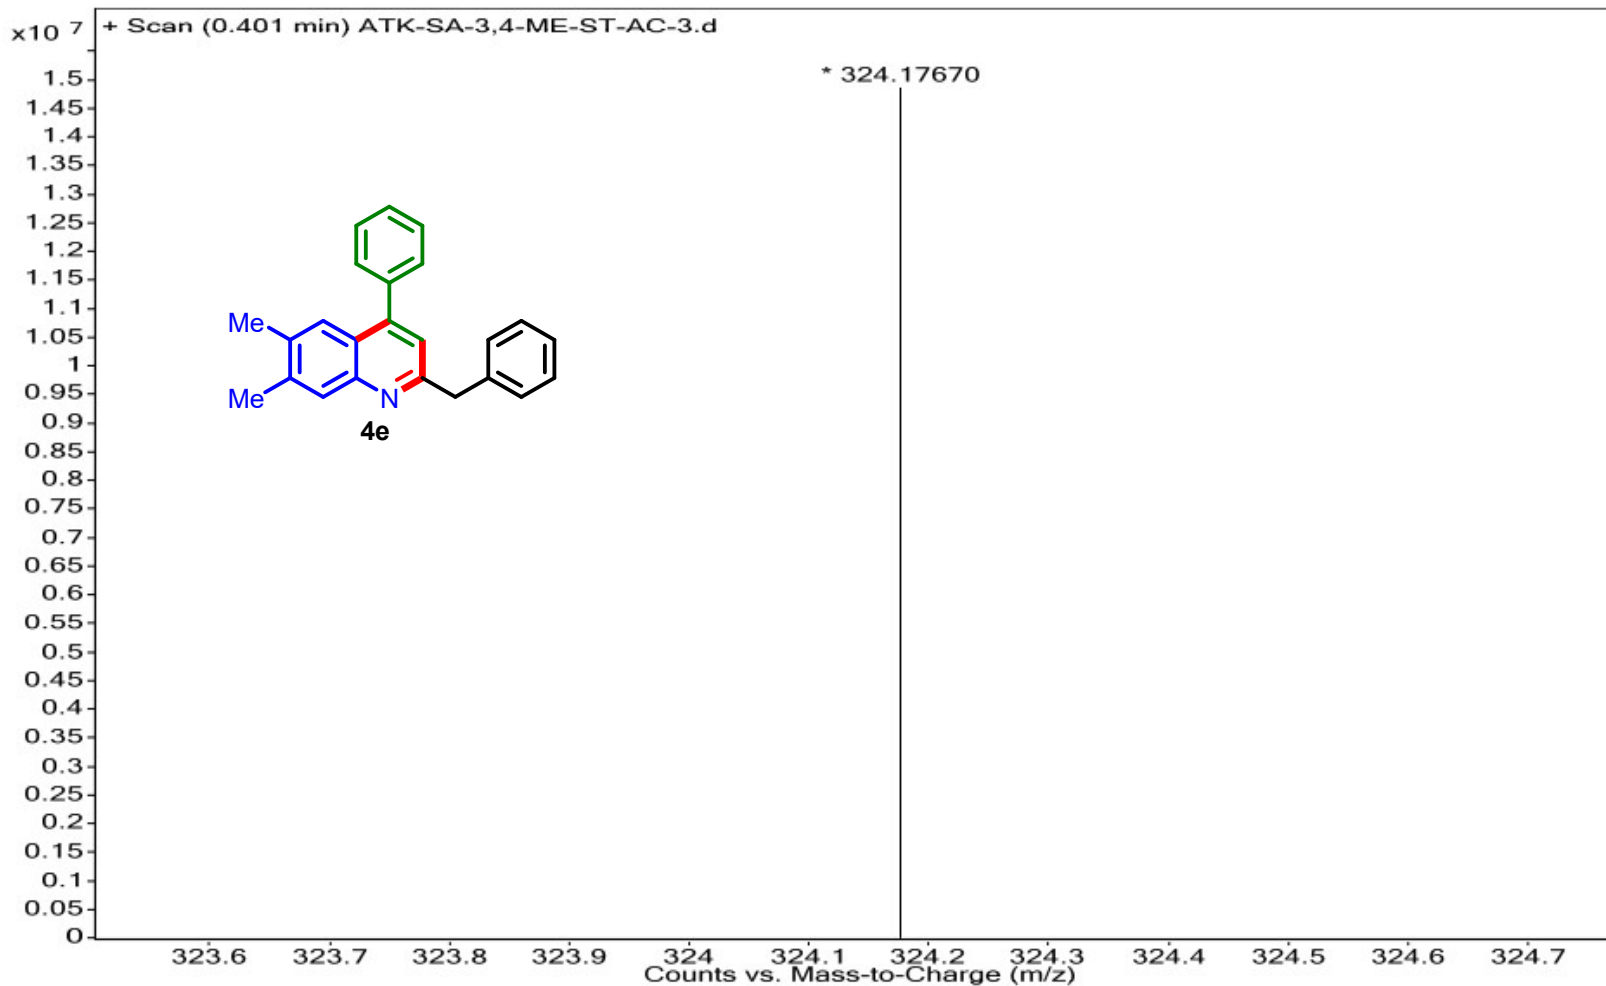

<sup>1</sup>H NMR spectrum of compound: 4f

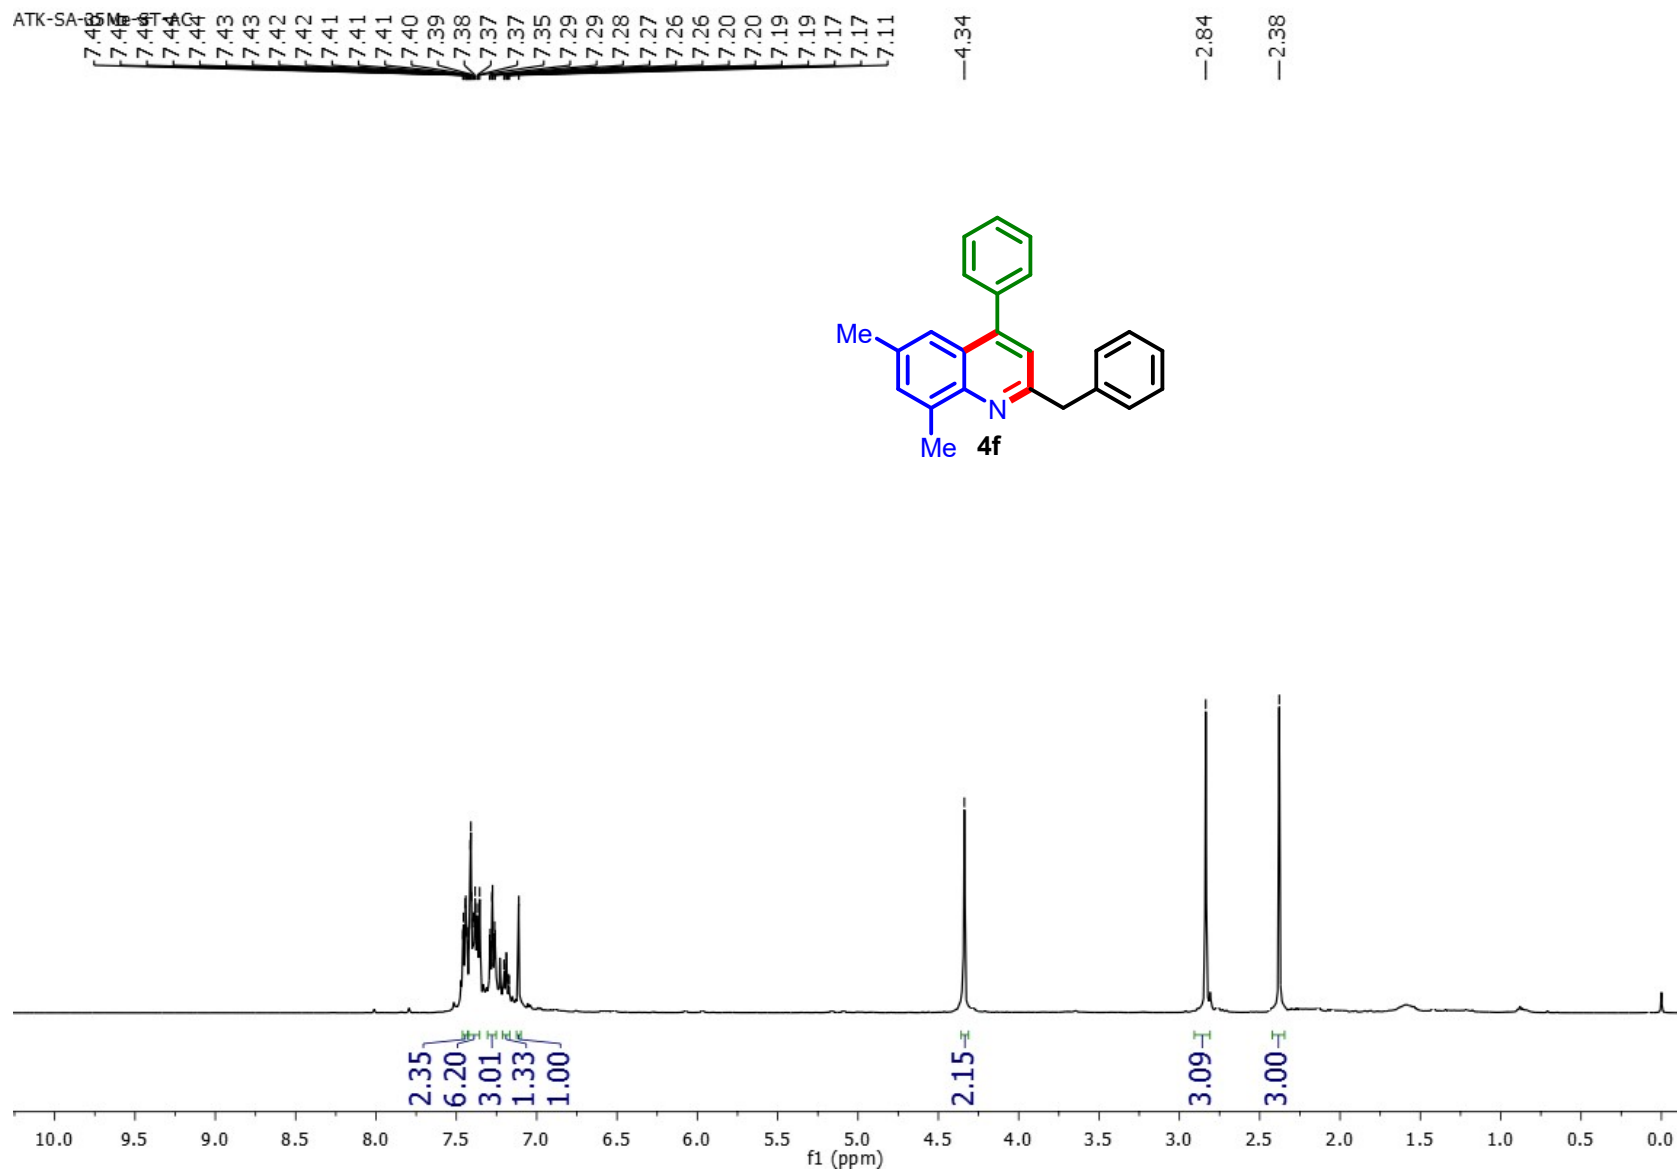

<sup>13</sup>C NMR spectrum of compound: 4f

ATK-SA-24Me-ST-AC

158.56  
148.36  
146.22  
140.01  
139.18  
137.13  
135.36  
131.86  
129.78  
129.47  
128.68  
128.55  
128.16  
126.47  
125.41  
122.53  
121.65

77.48  
77.23  
76.98

45.87

21.92  
18.51

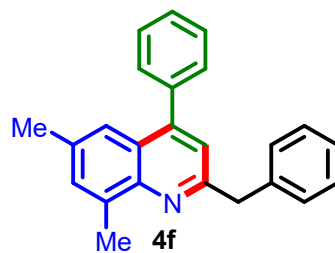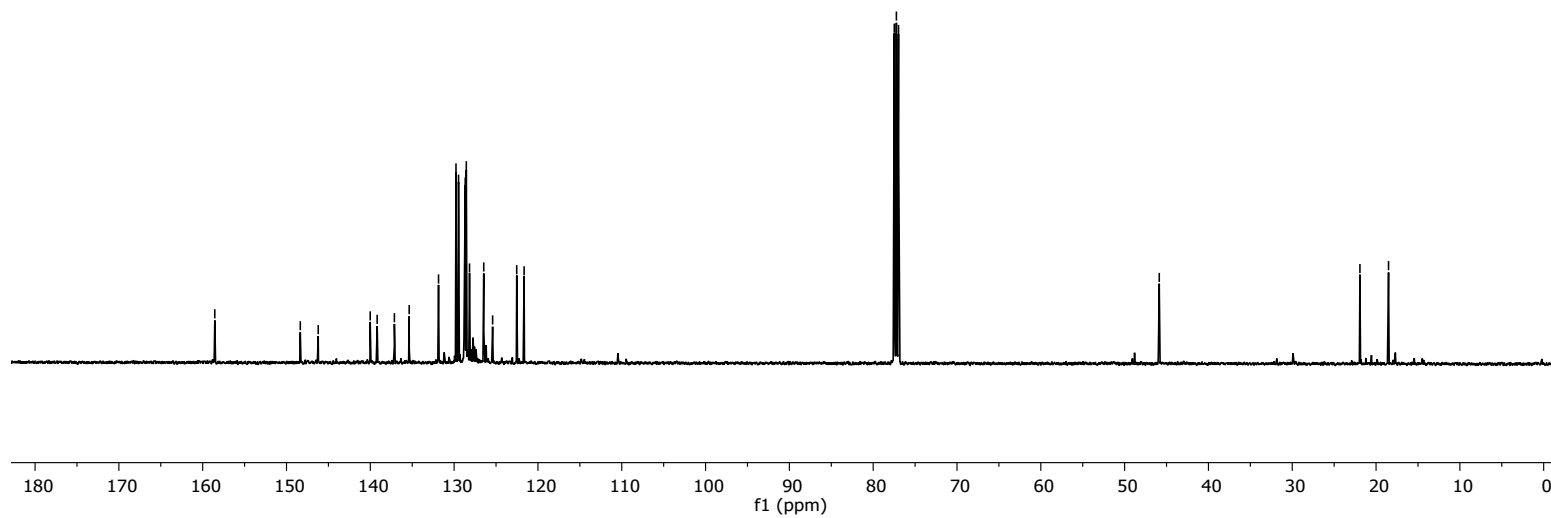

# HRMS spectrum of compound: 4f

Sample Name  
Inj Vol  
Data Filename

Position  
InjPosition  
ACQ Method

Instrument Name  
SampleType  
Comment

User Name  
IRM Calibration Status  
Acquired Time

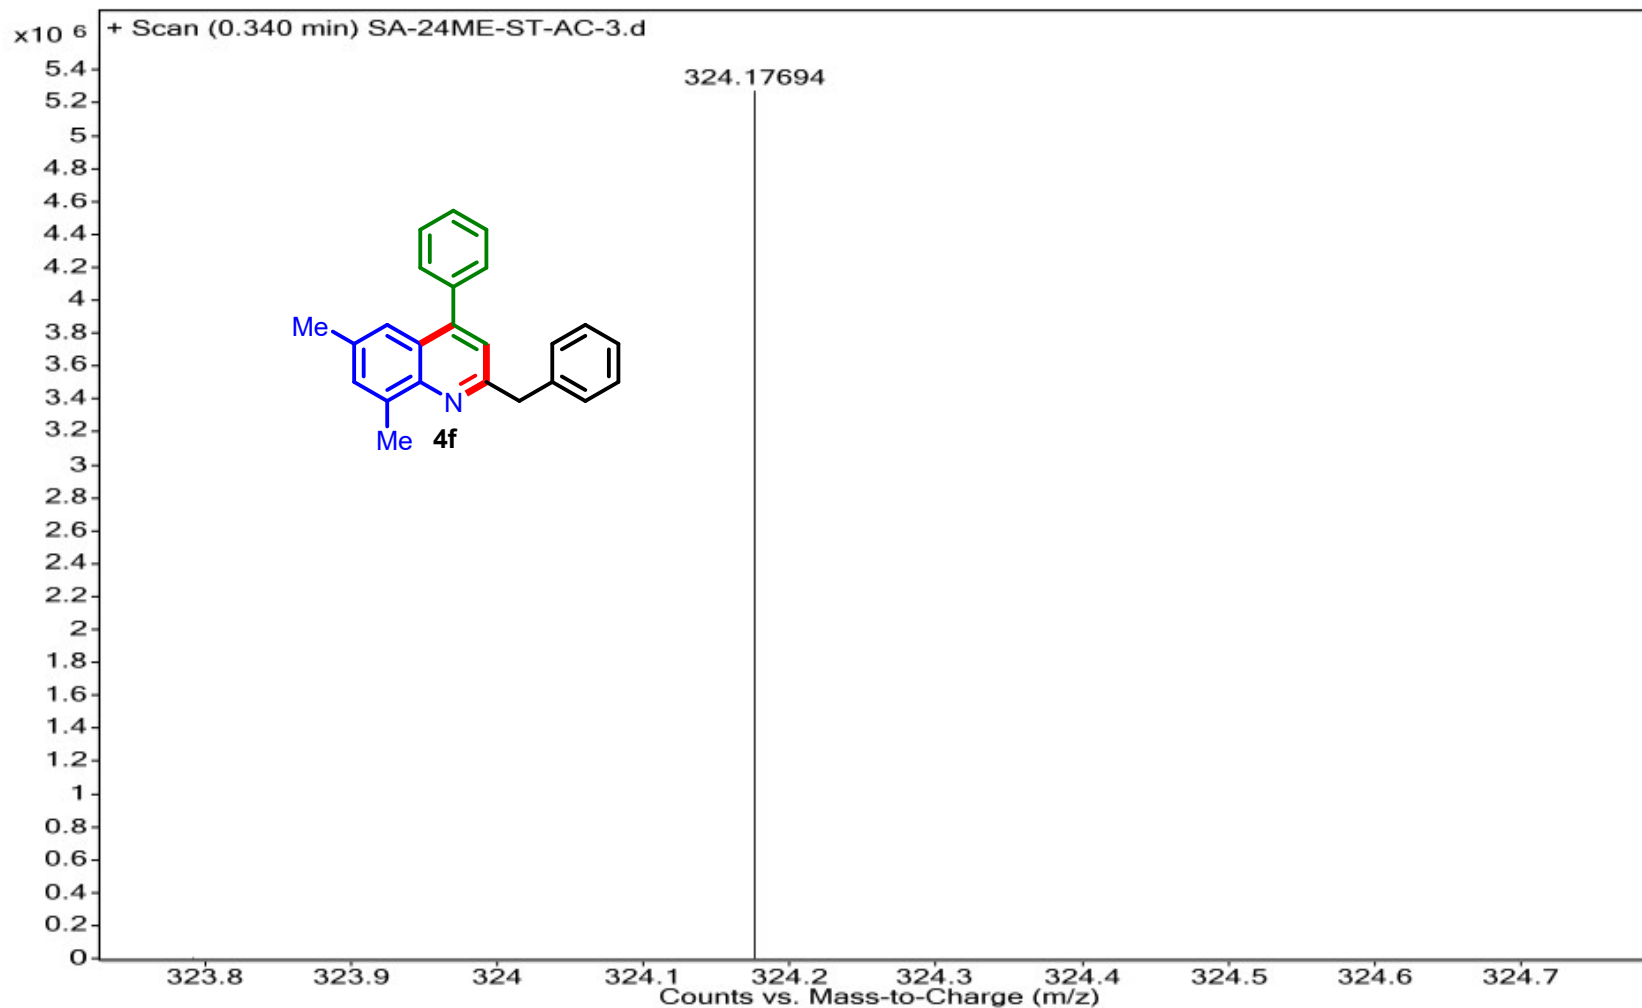

<sup>1</sup>H NMR spectrum of compound: 4g

ATK-SA-35Me-ST-AC

7.83  
7.38  
7.38  
7.37  
7.37  
7.32  
7.31  
7.29  
7.27  
7.26  
7.25  
7.24  
7.08  
6.98  
-4.30  
-2.49  
-1.94

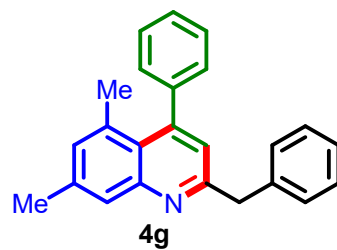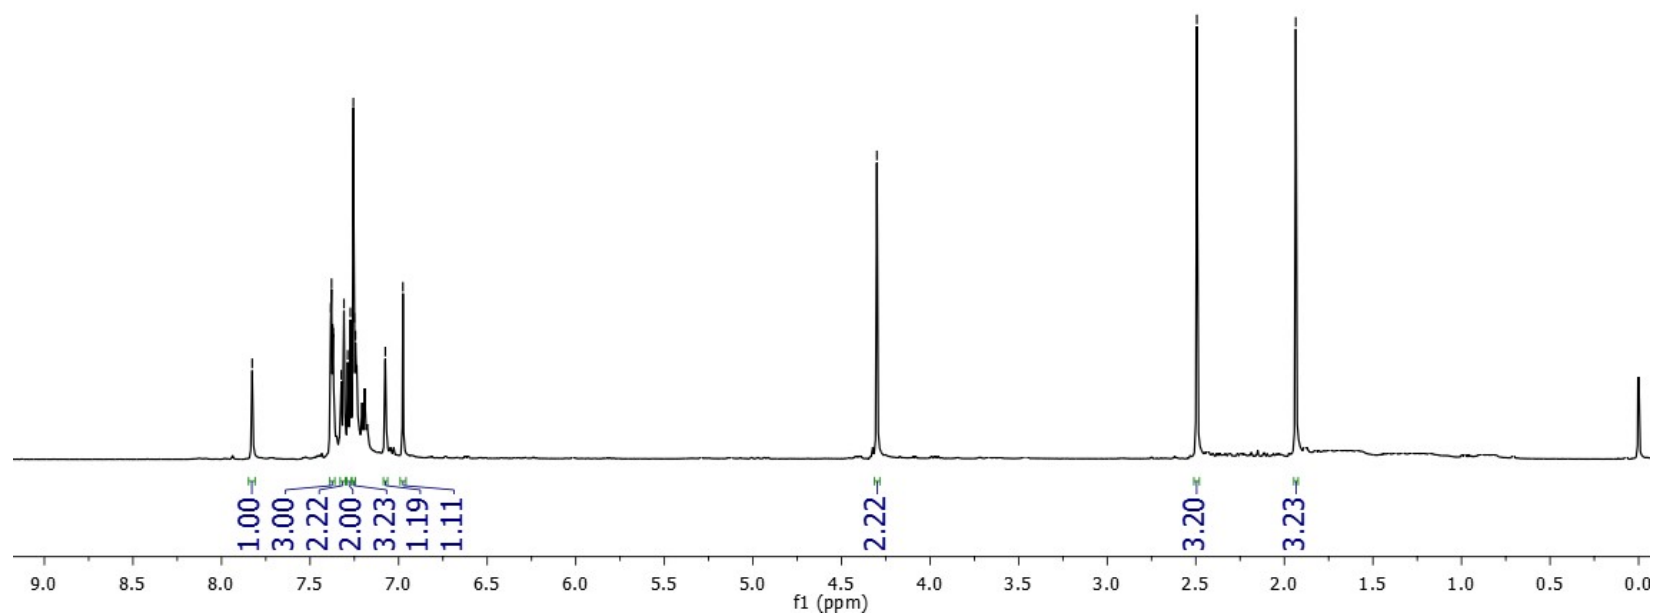

<sup>13</sup>C NMR spectrum of compound: 4g

ATK-SA-35Me-ST-AC

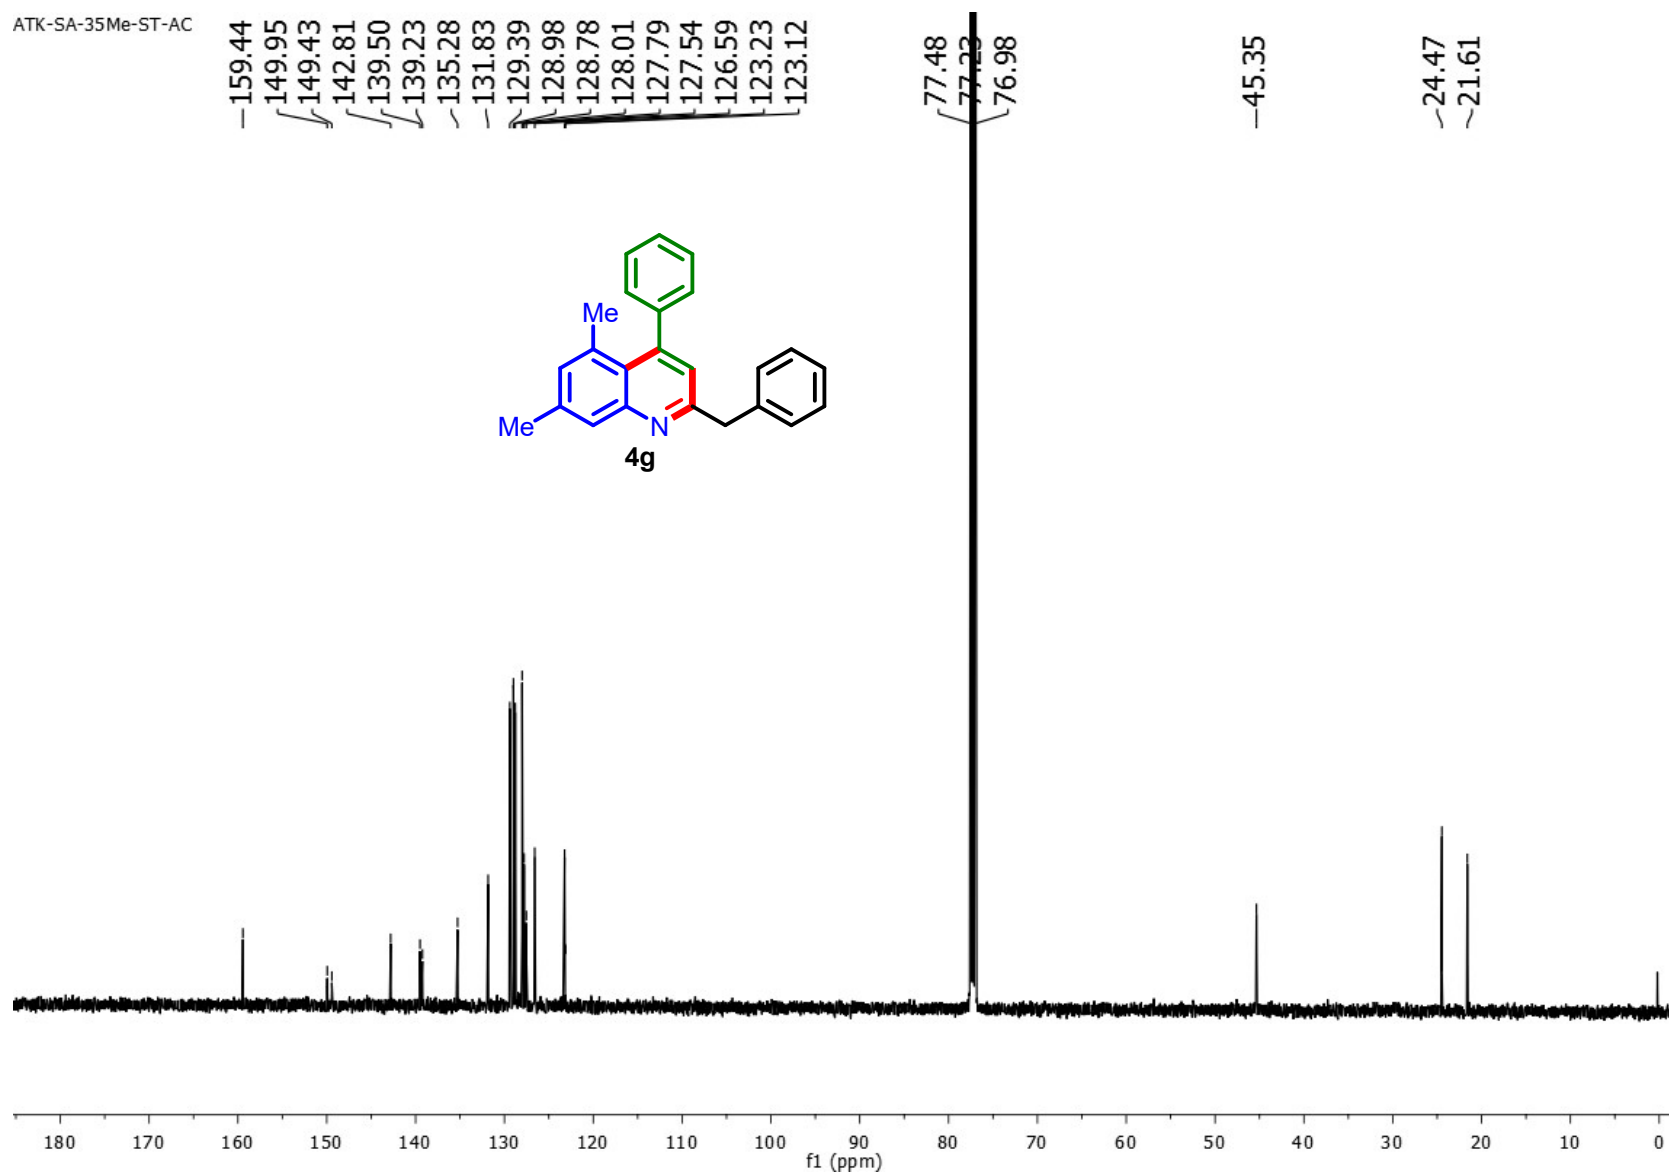

# HRMS spectrum of compound: 4g

Sample Name  
Inj Vol  
Data Filename

Position  
InjPosition  
ACQ Method

Instrument Name  
SampleType  
Comment

User Name  
IRM Calibration Status  
Acquired Time

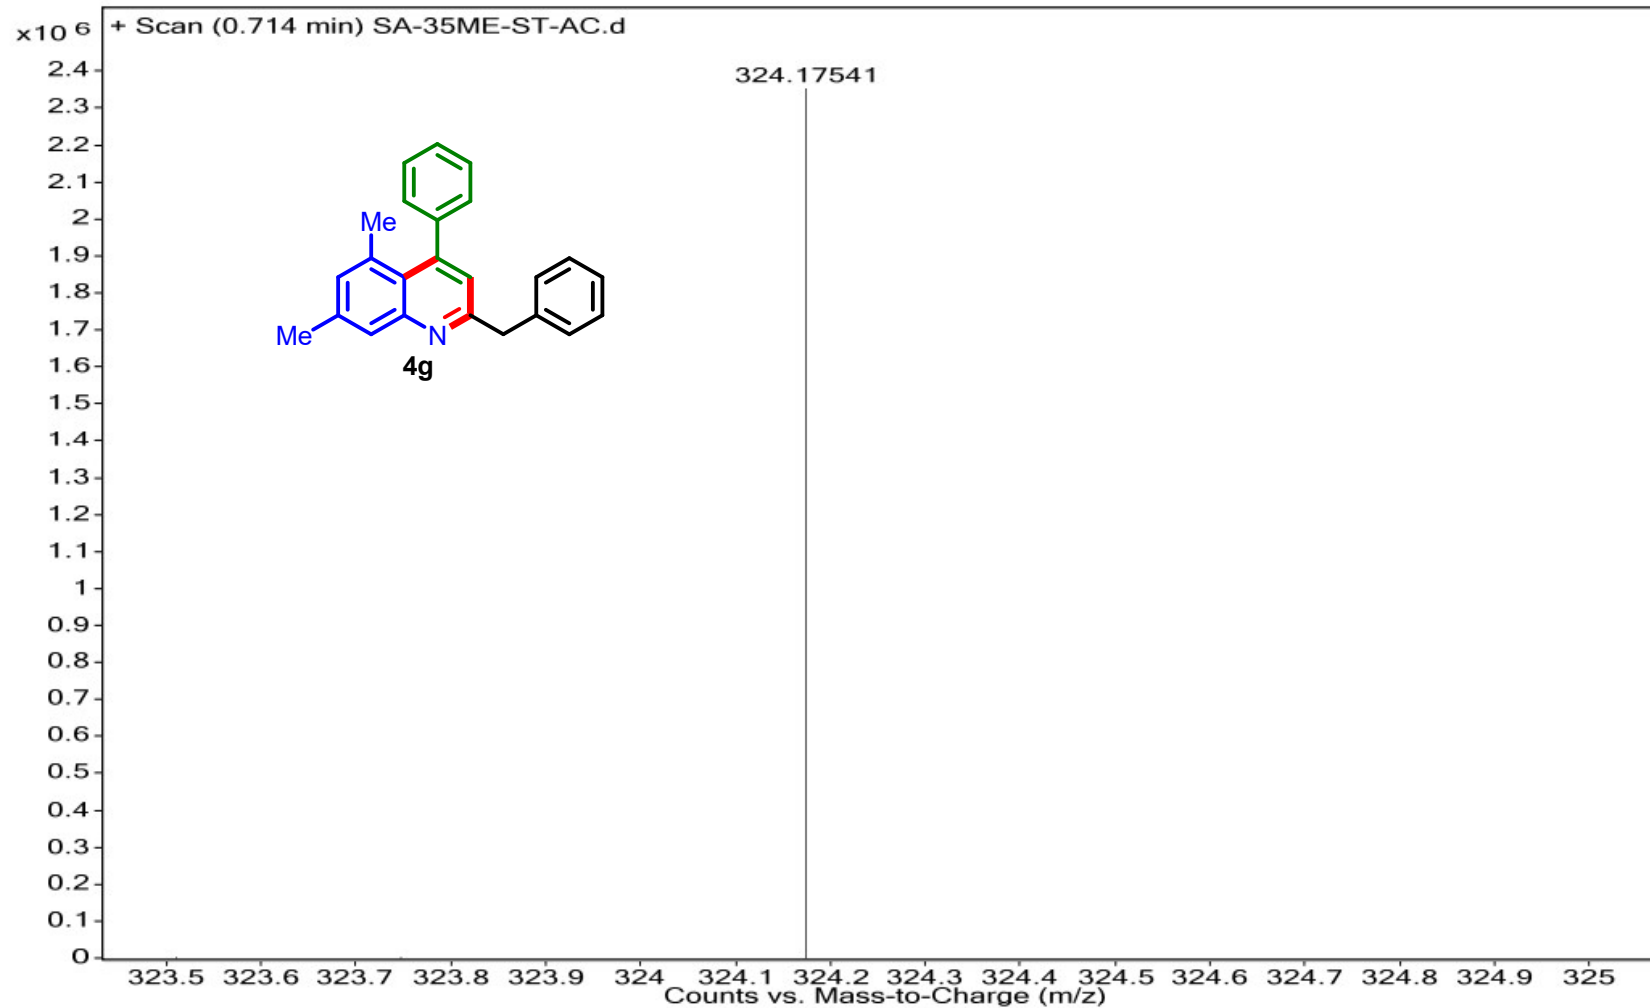



**<sup>1</sup>H NMR spectrum of compound: 4h**

SA-5IND-ST-AC

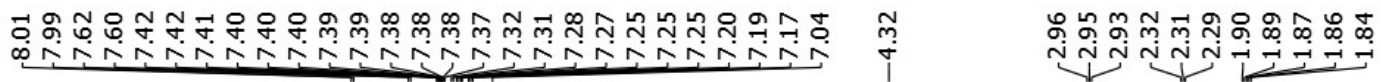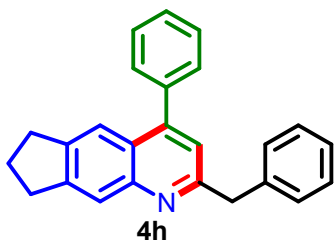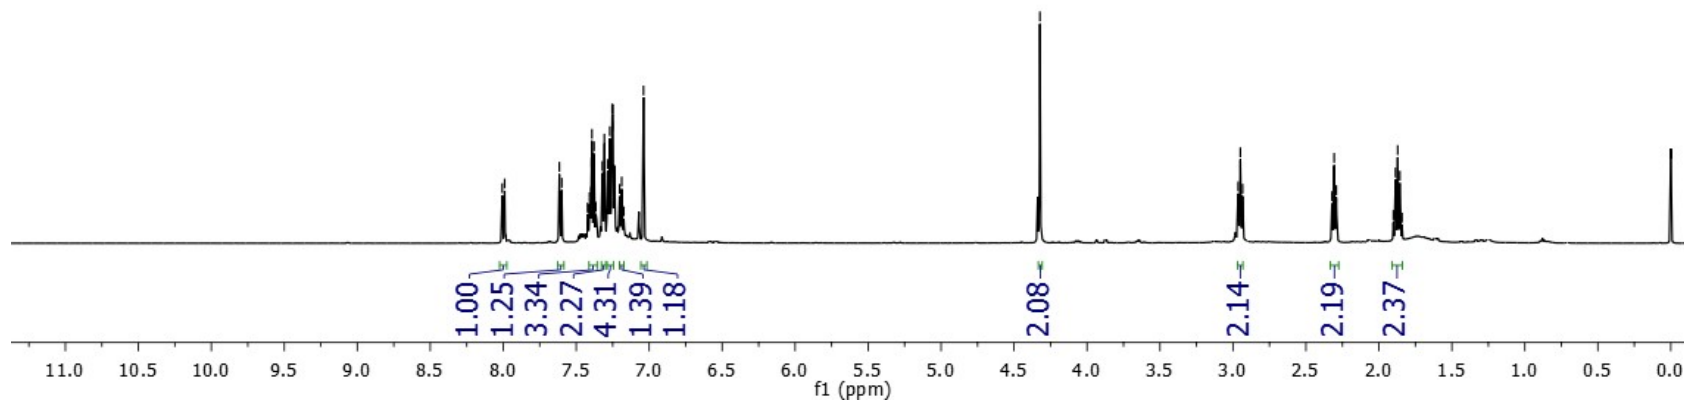

<sup>13</sup>C NMR spectrum of compound: 4h

SA-5IND-ST-AC

158.87  
148.72  
148.44  
143.14  
141.58  
139.67  
139.59  
129.73  
129.41  
129.29  
128.78  
128.56  
127.96  
127.87  
126.96  
126.59  
123.15

77.48  
77.23  
76.98

45.46

35.29  
33.39  
25.87

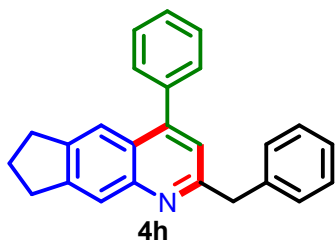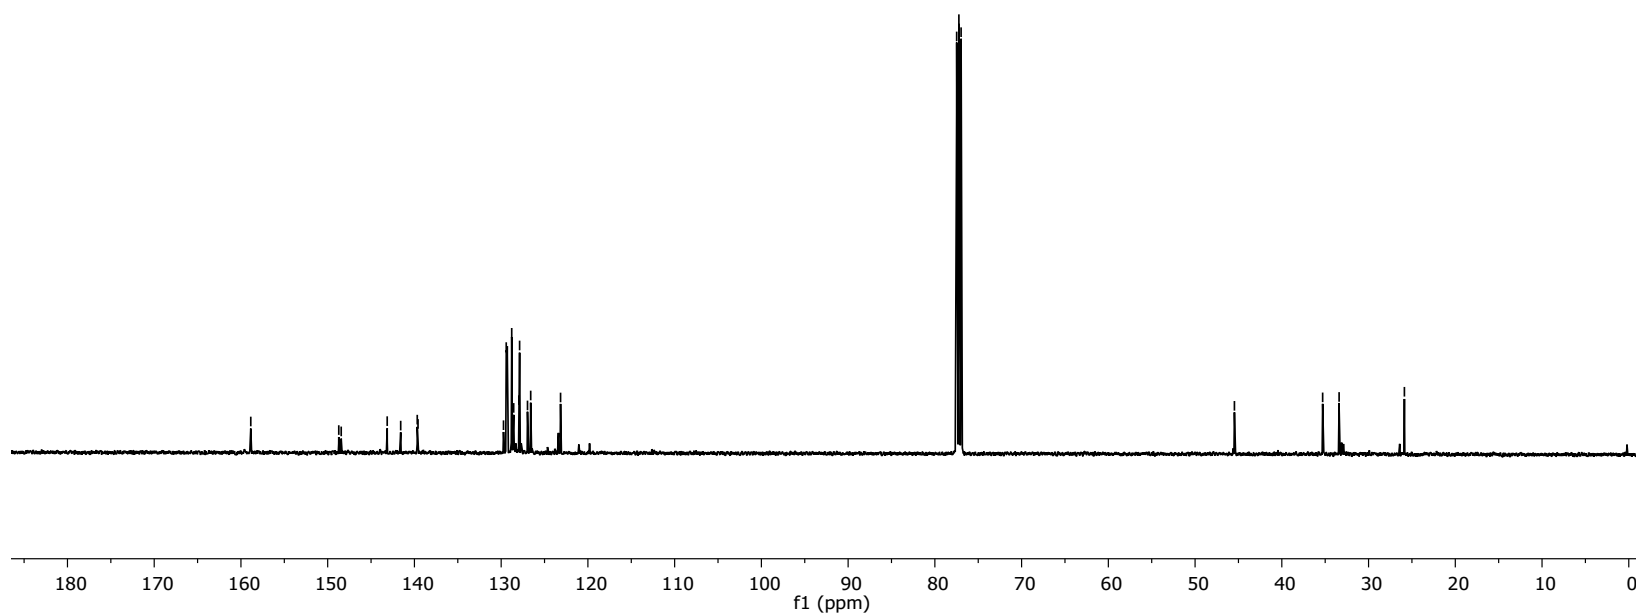

**HRMS spectrum of compound: 4h**

Sample Name  
Inj Vol  
Data Filename

Position  
InjPosition  
ACQ Method

Instrument Name  
SampleType  
Comment

User Name  
IRM Calibration Status  
Acquired Time

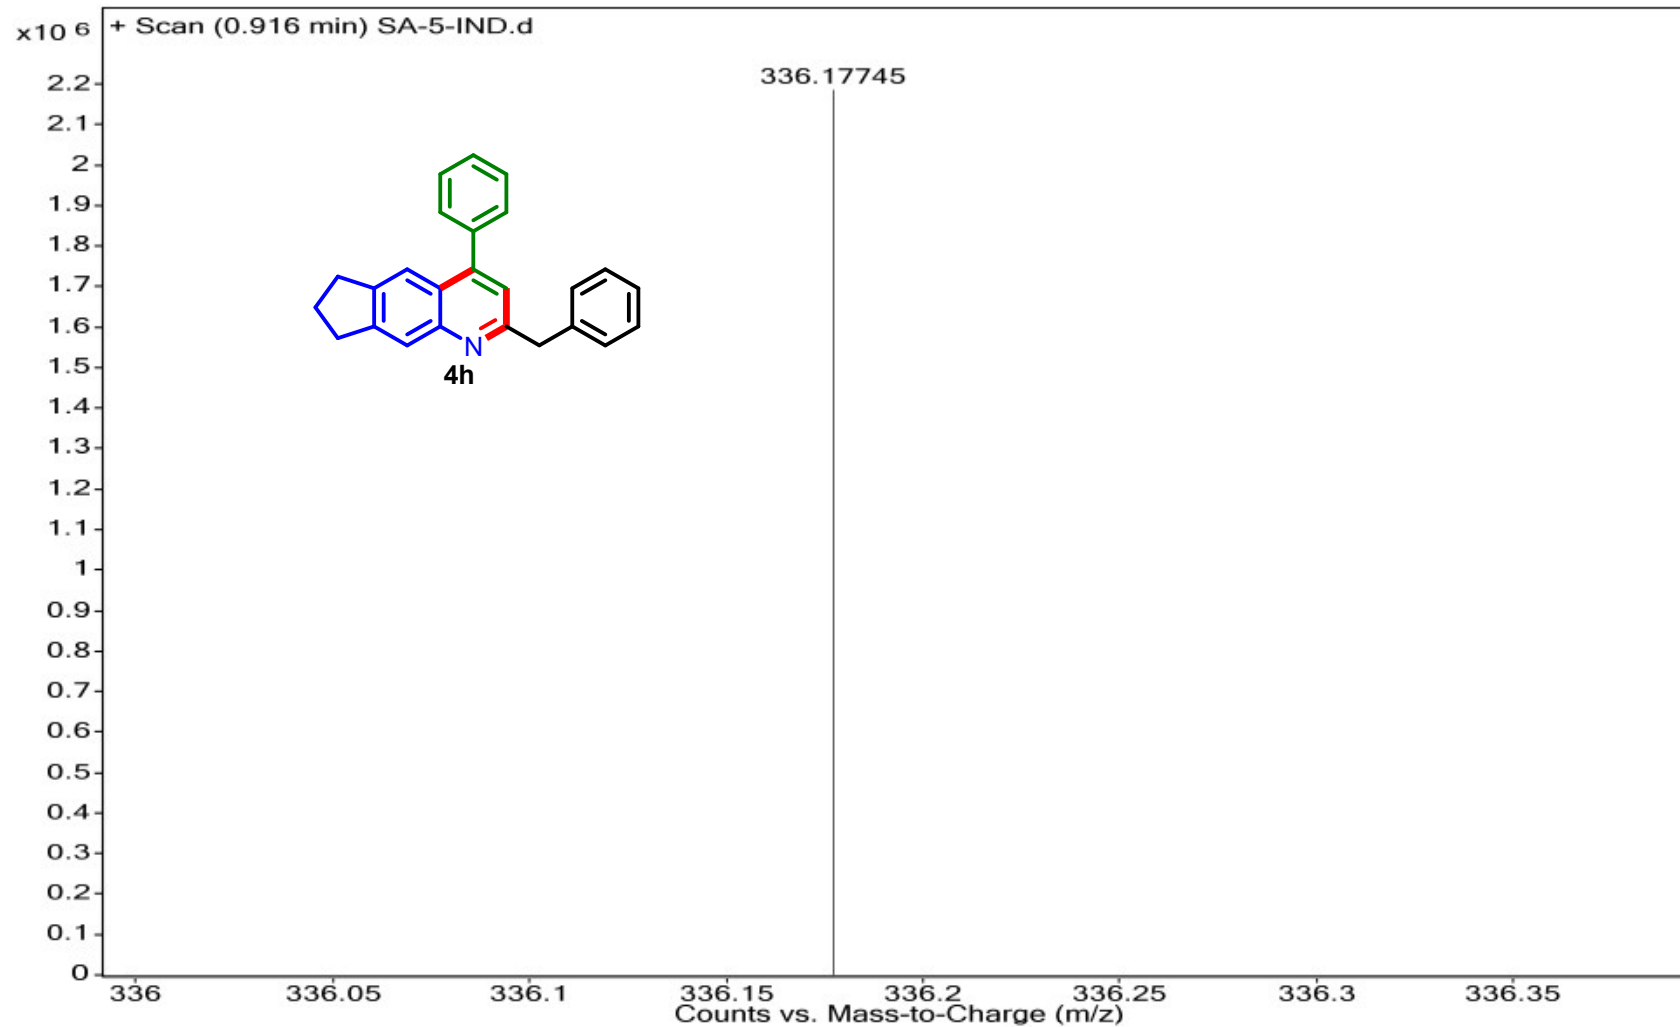

<sup>1</sup>H NMR spectrum of compound: 4i

SA-2FLR-ST-AC-B

8.27  
8.17  
7.77  
7.76  
7.75  
7.58  
7.57  
7.56  
7.54  
7.54  
7.52  
7.52  
7.50  
7.50  
7.38  
7.36  
7.35  
7.34  
7.34  
7.33  
7.33  
7.31  
7.24  
7.22  
7.20  
7.17  
4.39  
4.15

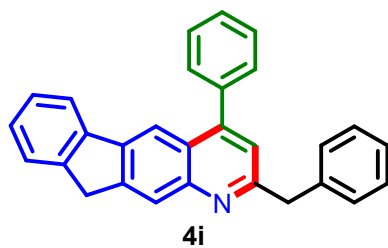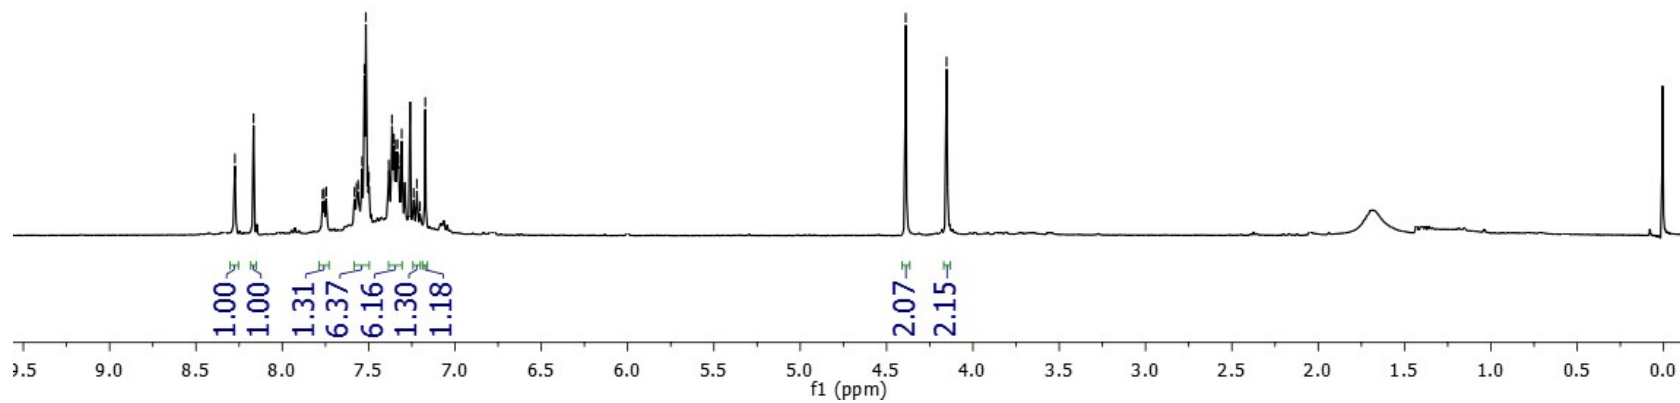

<sup>13</sup>C NMR spectrum of compound: 4i

SA-2FLR-ST-AC-B

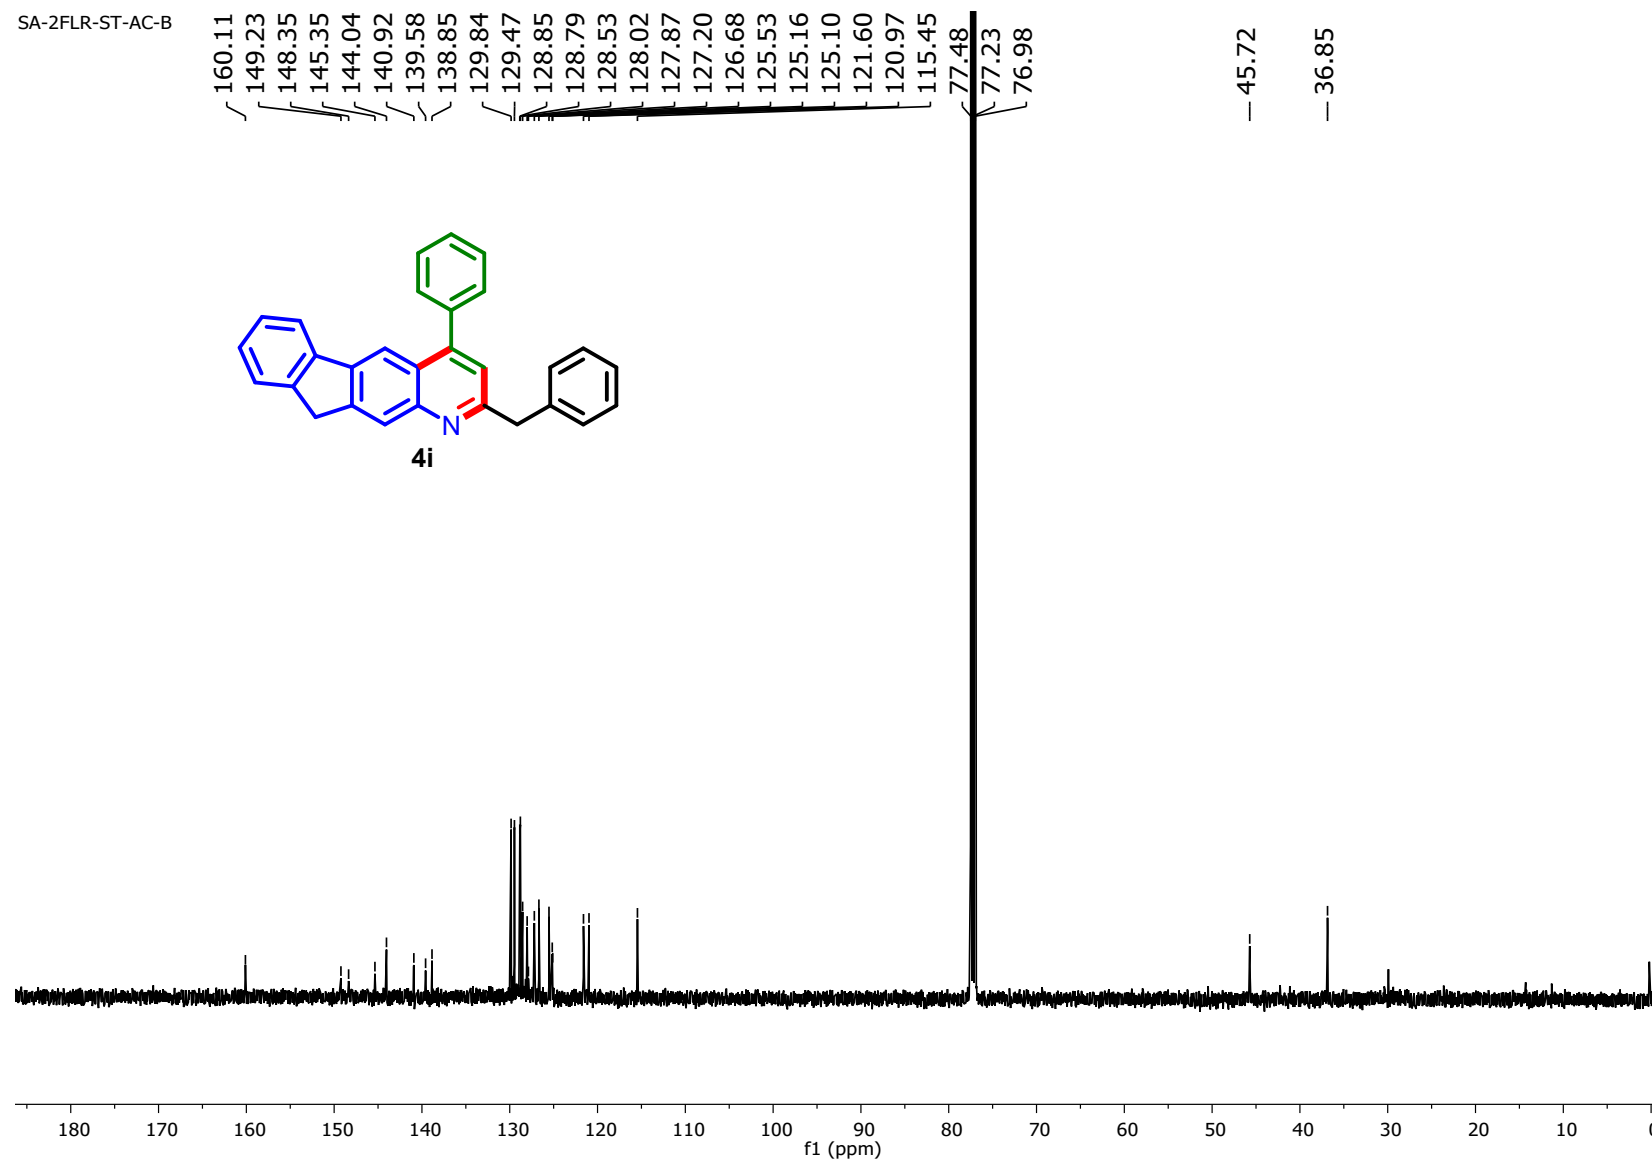

## HRMS spectrum of compound: 4i

|                    |                    |                               |         |                        |                                 |
|--------------------|--------------------|-------------------------------|---------|------------------------|---------------------------------|
| <b>Sample Name</b> | SA-2FLR            | <b>Position</b>               | P1-C2   | <b>Instrument Name</b> | Instrument 1                    |
| <b>User Name</b>   |                    | <b>Inj Vol</b>                | 5       | <b>InjPosition</b>     |                                 |
| <b>Sample Type</b> | Sample             | <b>IRM Calibration Status</b> | Success | <b>Data Filename</b>   | SA-2FLR.d                       |
| <b>ACQ Method</b>  | ESI ALS 100-1000.m | <b>Comment</b>                |         | <b>Acquired Time</b>   | 28-07-2021 14:54:15 (UTC+05:30) |

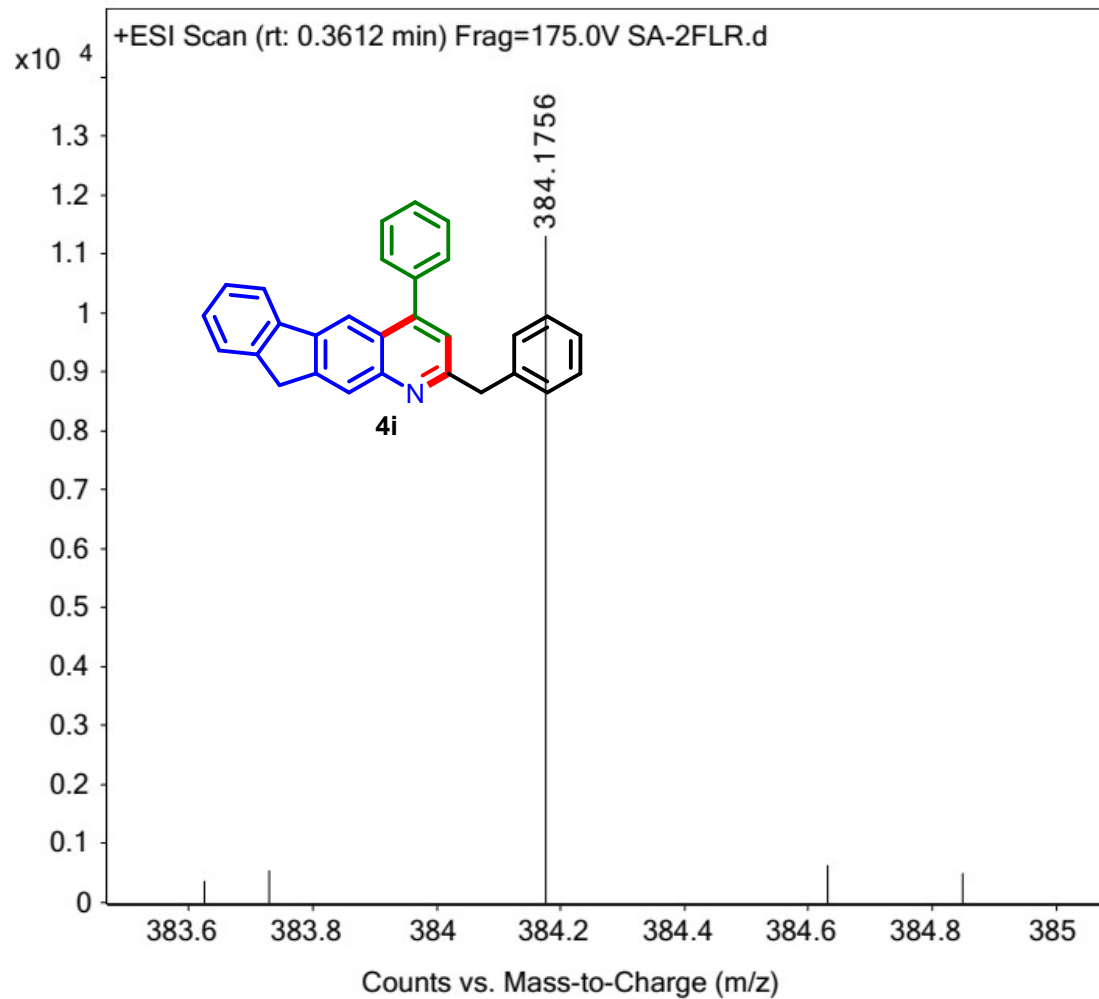

<sup>1</sup>H NMR spectrum of compound: 4j

SA-4F-ST-AC-A

8.16  
8.15  
8.14  
8.13  
7.50  
7.50  
7.49  
7.49  
7.48  
7.48  
7.48  
7.47  
7.47  
7.46  
7.46  
7.45  
7.45  
7.44  
7.44  
7.41  
7.41  
7.40  
7.40  
7.40  
7.34  
7.34  
7.33  
7.32  
7.31  
7.29  
7.29  
7.28  
7.23  
7.21  
7.20  
4.35

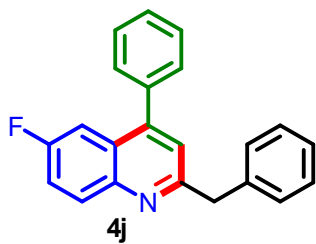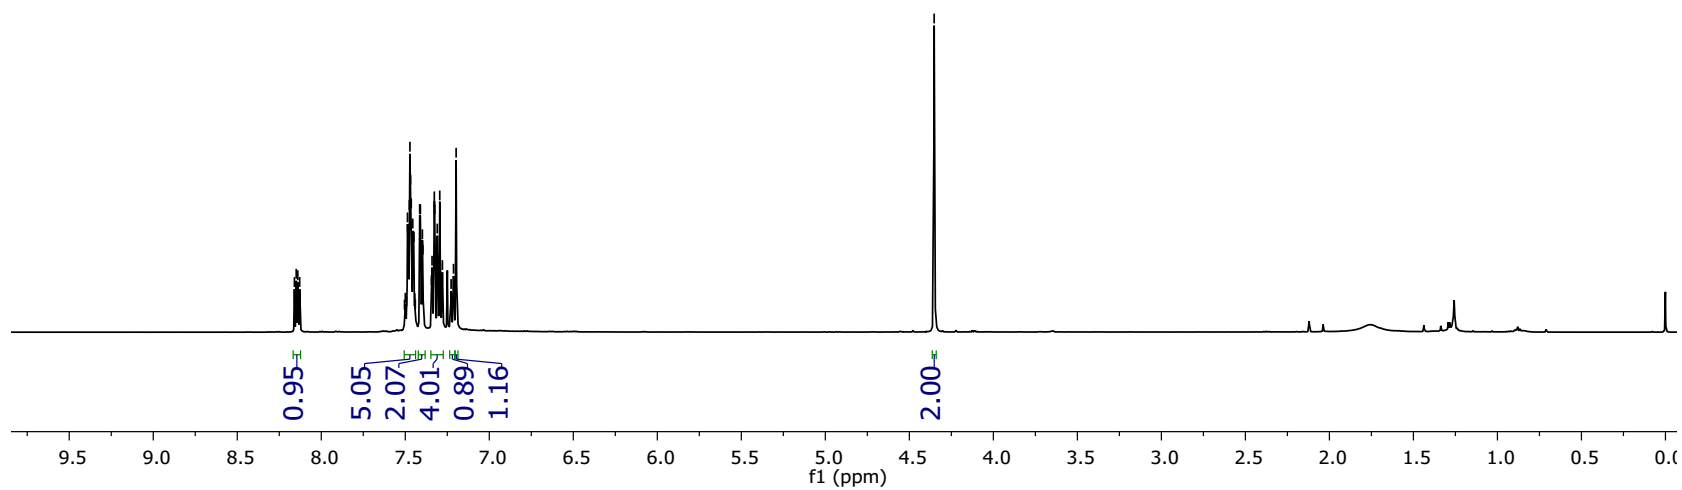



<sup>13</sup>C NMR spectrum of compound: 4j

SA-4F-ST-AC-A

161.63  
160.34  
160.32  
159.67  
148.67  
148.63  
145.66  
139.28  
137.91  
132.03  
131.96  
129.53  
129.41  
128.89  
128.77  
126.78  
126.42  
126.35  
122.49  
119.71  
119.51  
109.40  
109.21  
77.48  
77.23  
76.98  
— 45.64

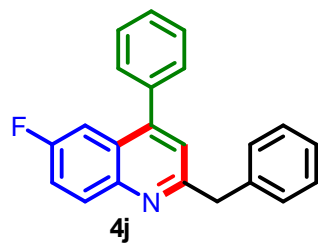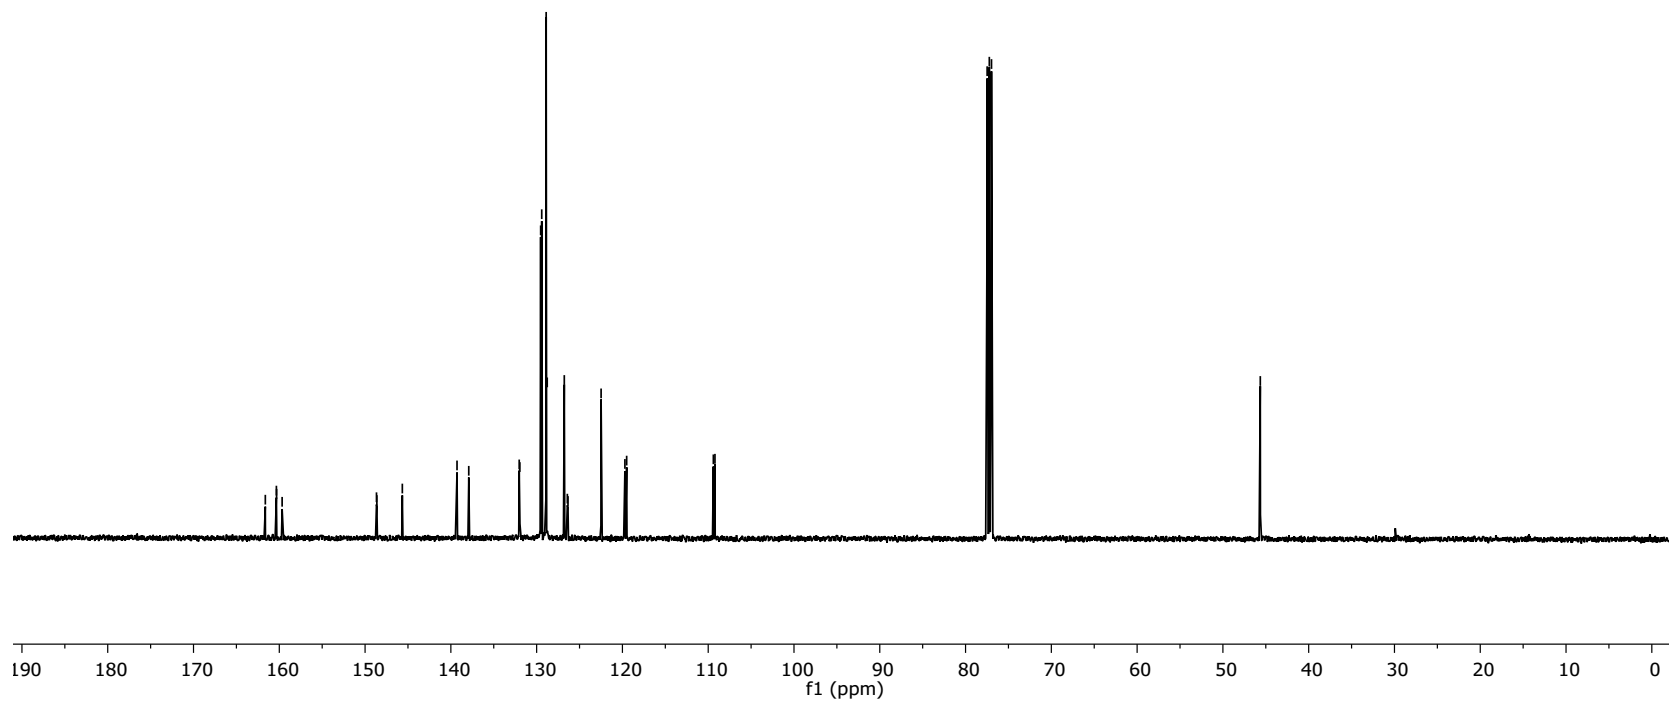

### HRMS spectrum of compound: 4j

|               |         |             |                    |                 |              |                        |                      |
|---------------|---------|-------------|--------------------|-----------------|--------------|------------------------|----------------------|
| Sample Name   | SA-4F   | Position    | P1-B5              | Instrument Name | Instrument 1 | User Name              |                      |
| Inj Vol       | 5       | InjPosition |                    | SampleType      | Sample       | IRM Calibration Status | Success              |
| Data Filename | SA-4F.d | ACQ Method  | ESI ALS 100-1000.m | Comment         |              | Acquired Time          | 7/28/2021 1:57:16 PM |

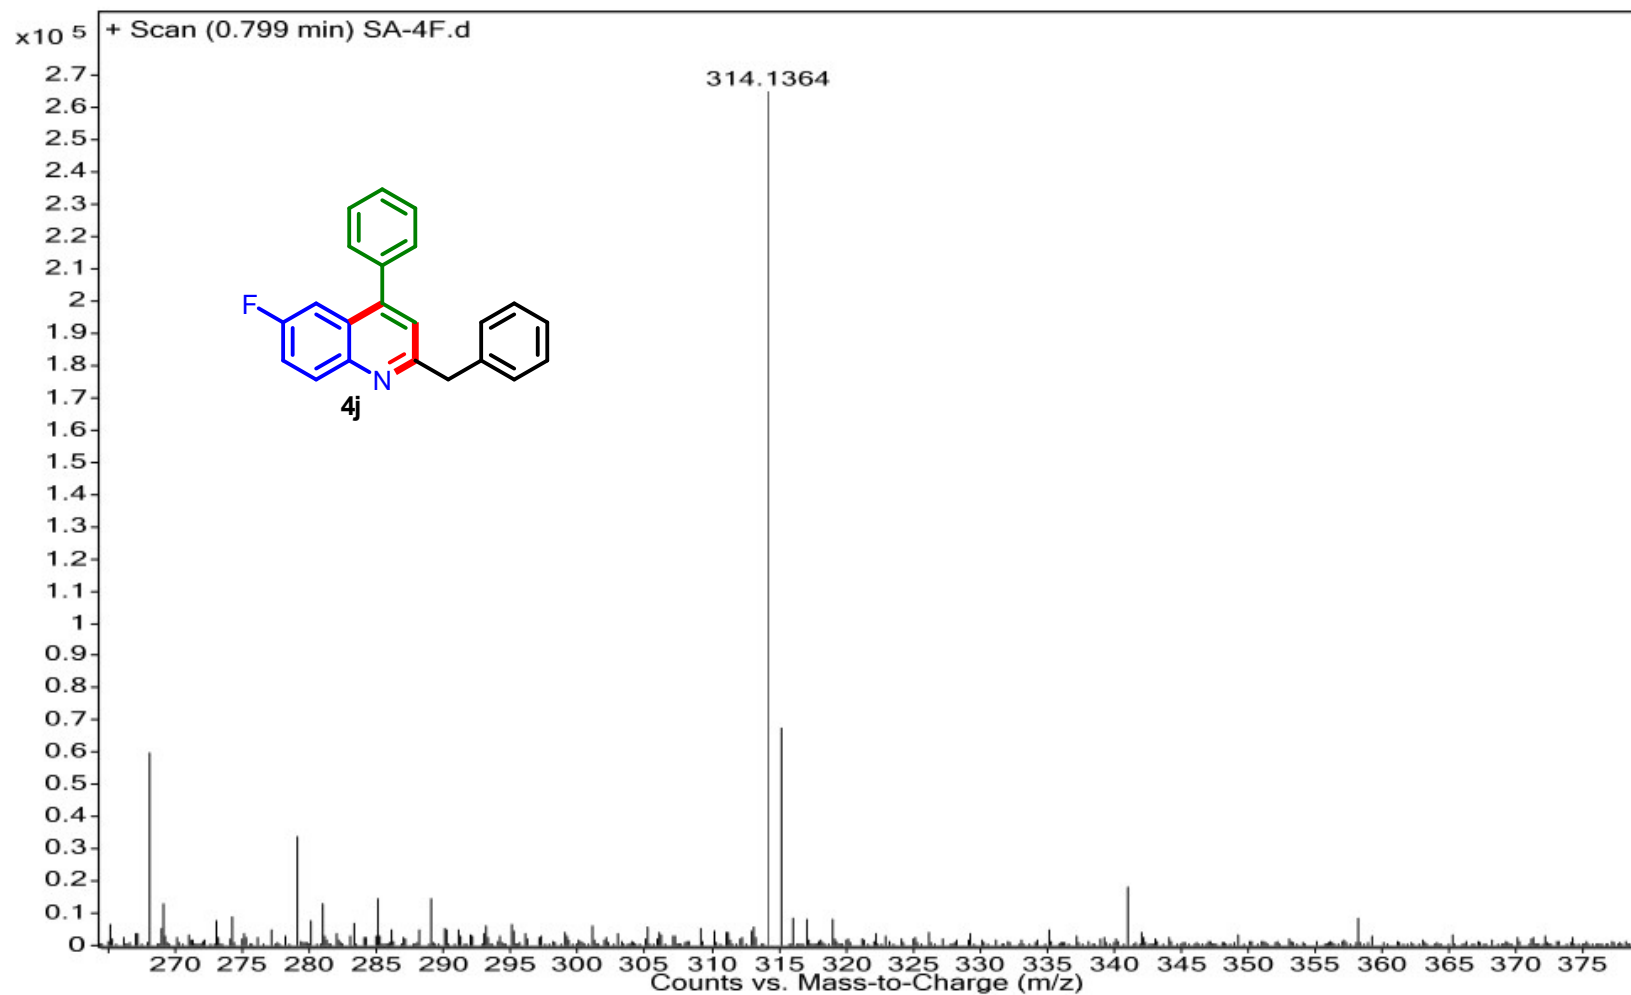

**<sup>1</sup>H NMR spectrum of compound: 4k**

SA-4Cl-ST-AC  
8.10  
8.08  
7.82  
7.81  
7.65  
7.65  
7.64  
7.63  
7.52  
7.51  
7.50  
7.50  
7.50  
7.49  
7.49  
7.48  
7.48  
7.47  
7.42  
7.41  
7.40  
7.34  
7.33  
7.33  
7.32  
7.31  
7.30  
7.30  
7.29  
7.24  
7.22  
7.21  
7.20  
4.36

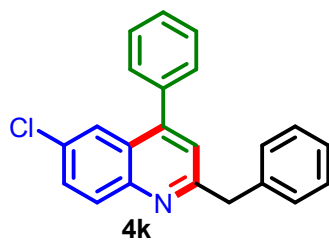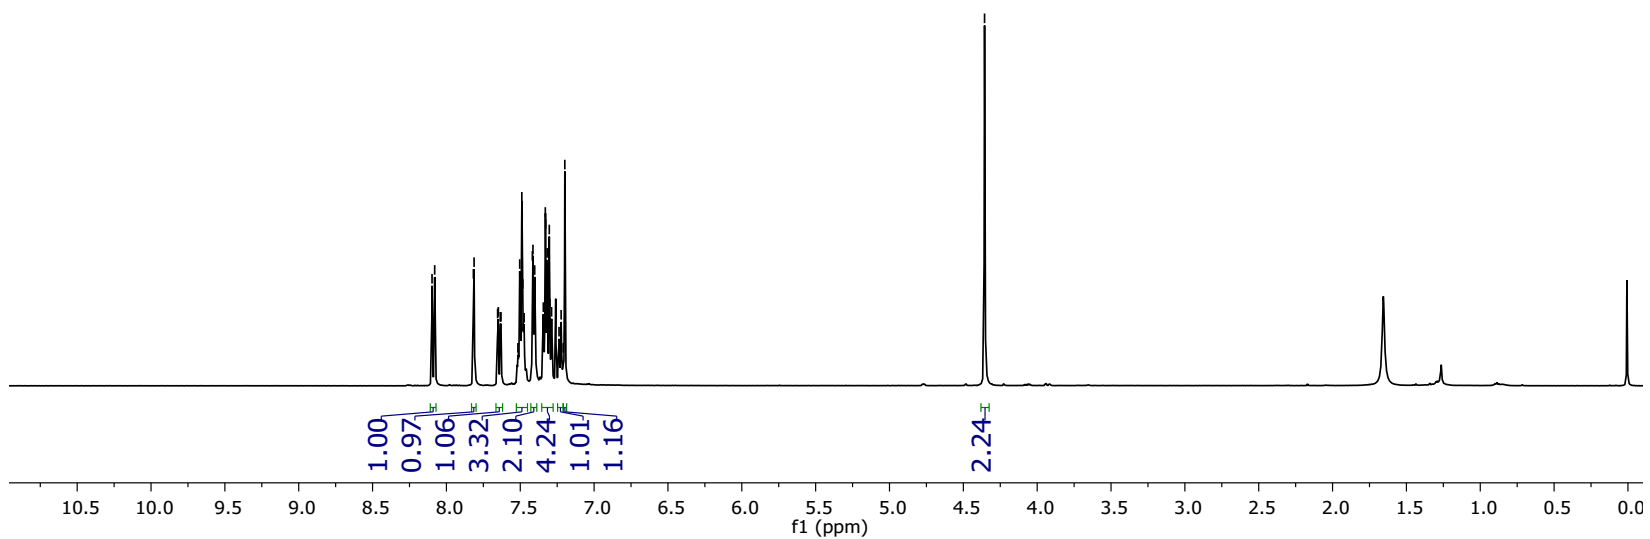

<sup>13</sup>C NMR spectrum of compound: 4k

SA-4Cl-ST-AC

— 161.31

148.38

147.01

139.14

137.71

132.19

131.28

130.45

129.62

129.43

128.92

128.83

126.82

126.40

124.73

122.66

77.48

77.23

76.98

— 45.75

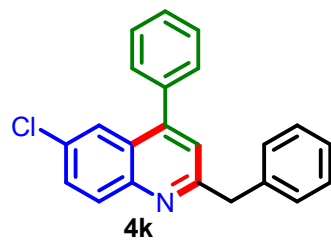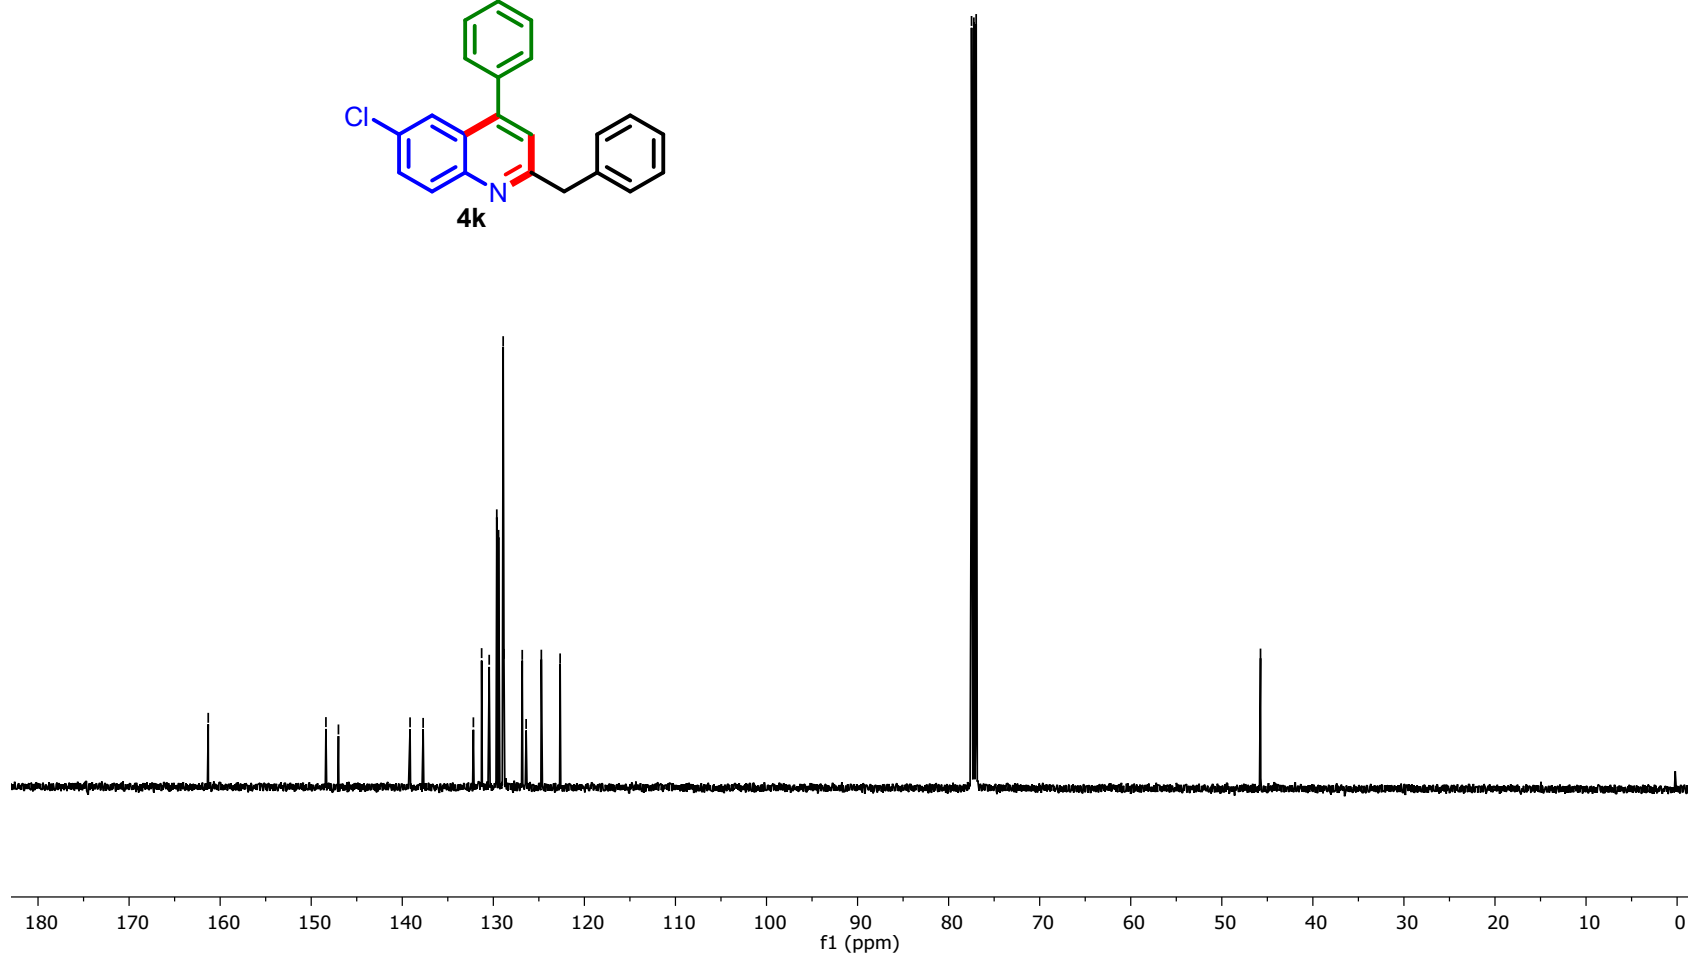

# HRMS spectrum of compound: 4k

|                    |                    |                               |         |                        |                                 |
|--------------------|--------------------|-------------------------------|---------|------------------------|---------------------------------|
| <b>Sample Name</b> | SA-4BR             | <b>Position</b>               | P1-B7   | <b>Instrument Name</b> | Instrument 1                    |
| <b>User Name</b>   |                    | <b>Inj Vol</b>                | 5       | <b>InjPosition</b>     |                                 |
| <b>Sample Type</b> | Sample             | <b>IRM Calibration Status</b> | Success | <b>Data Filename</b>   | SA-4BR.d                        |
| <b>ACQ Method</b>  | ESI ALS 100-1000.m | <b>Comment</b>                |         | <b>Acquired Time</b>   | 28-07-2021 14:11:55 (UTC+05:30) |

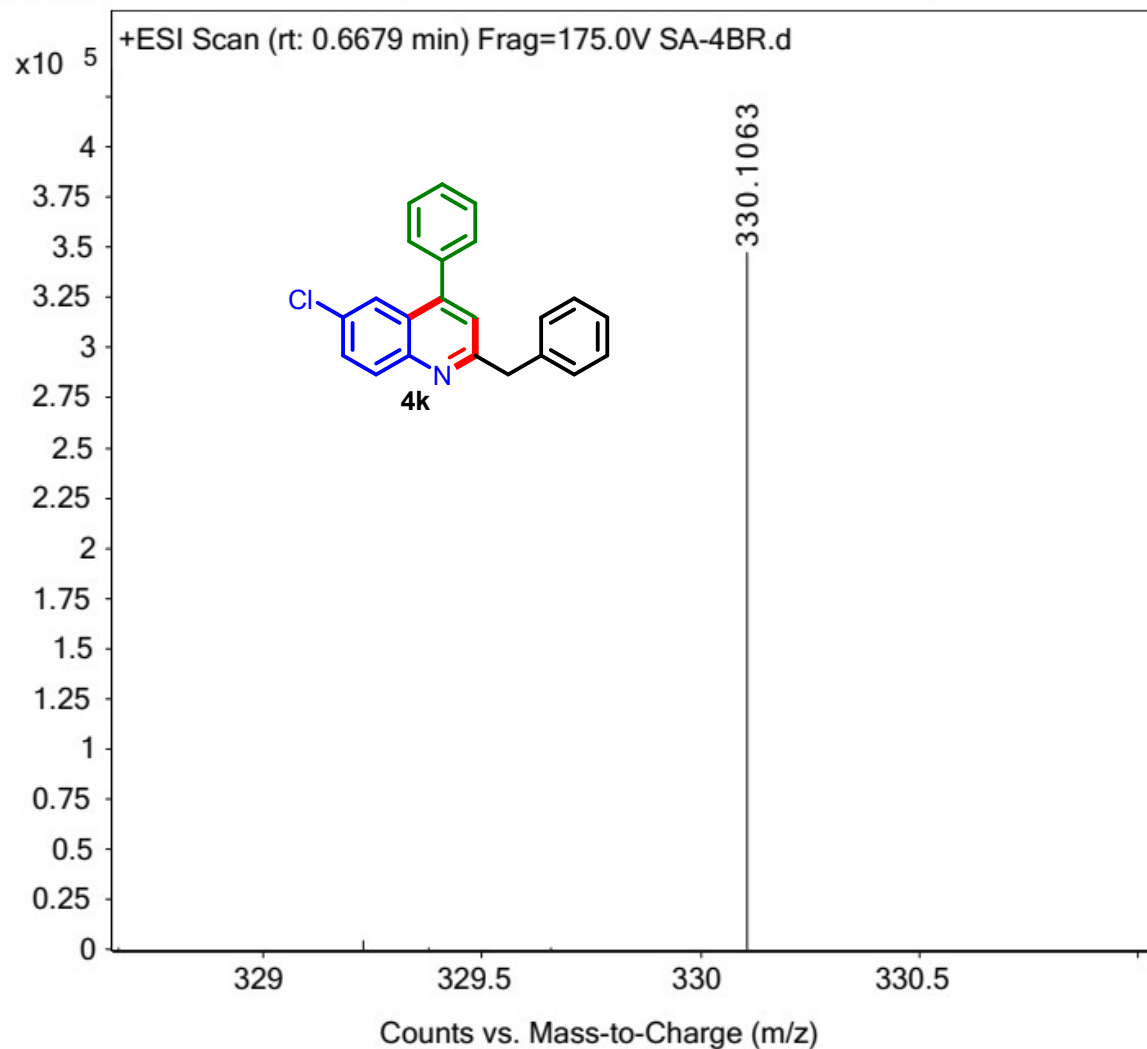

<sup>1</sup>H NMR spectrum of compound: 4l

SA-4Br  
8.17  
8.16  
7.86  
7.85  
7.73  
7.71  
7.69  
7.50  
7.50  
7.49  
7.48  
7.47  
7.47  
7.46  
7.45  
7.45  
7.44  
7.44  
7.44  
7.43  
7.42  
7.36  
7.34  
7.31  
7.30  
7.28  
7.23  
7.22  
7.20  
7.18  
4.38

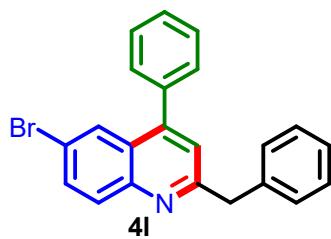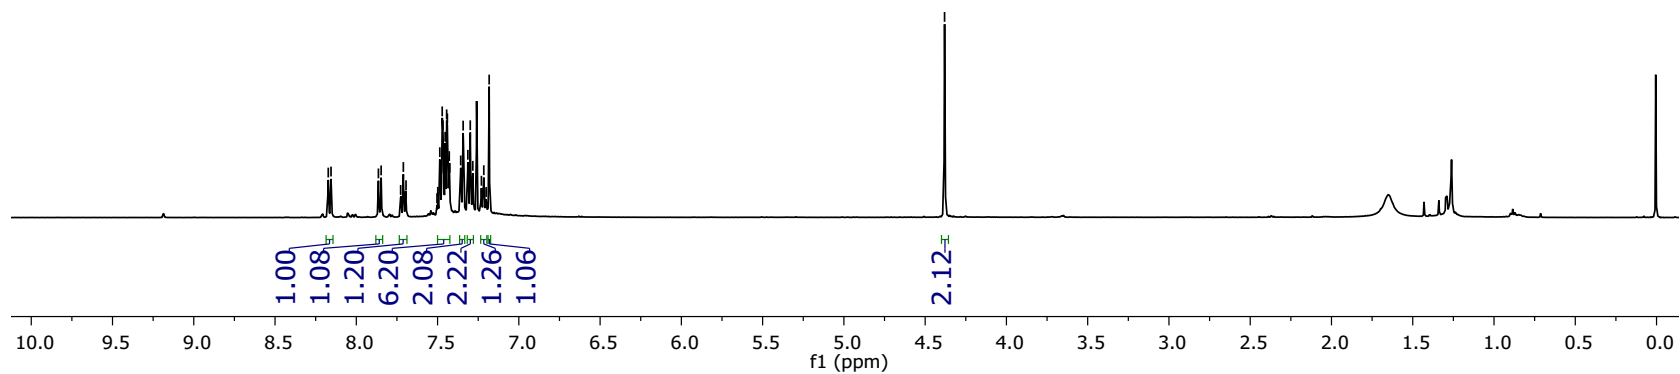

<sup>13</sup>C NMR spectrum of compound: 4l

SA-4Br-ST-AC

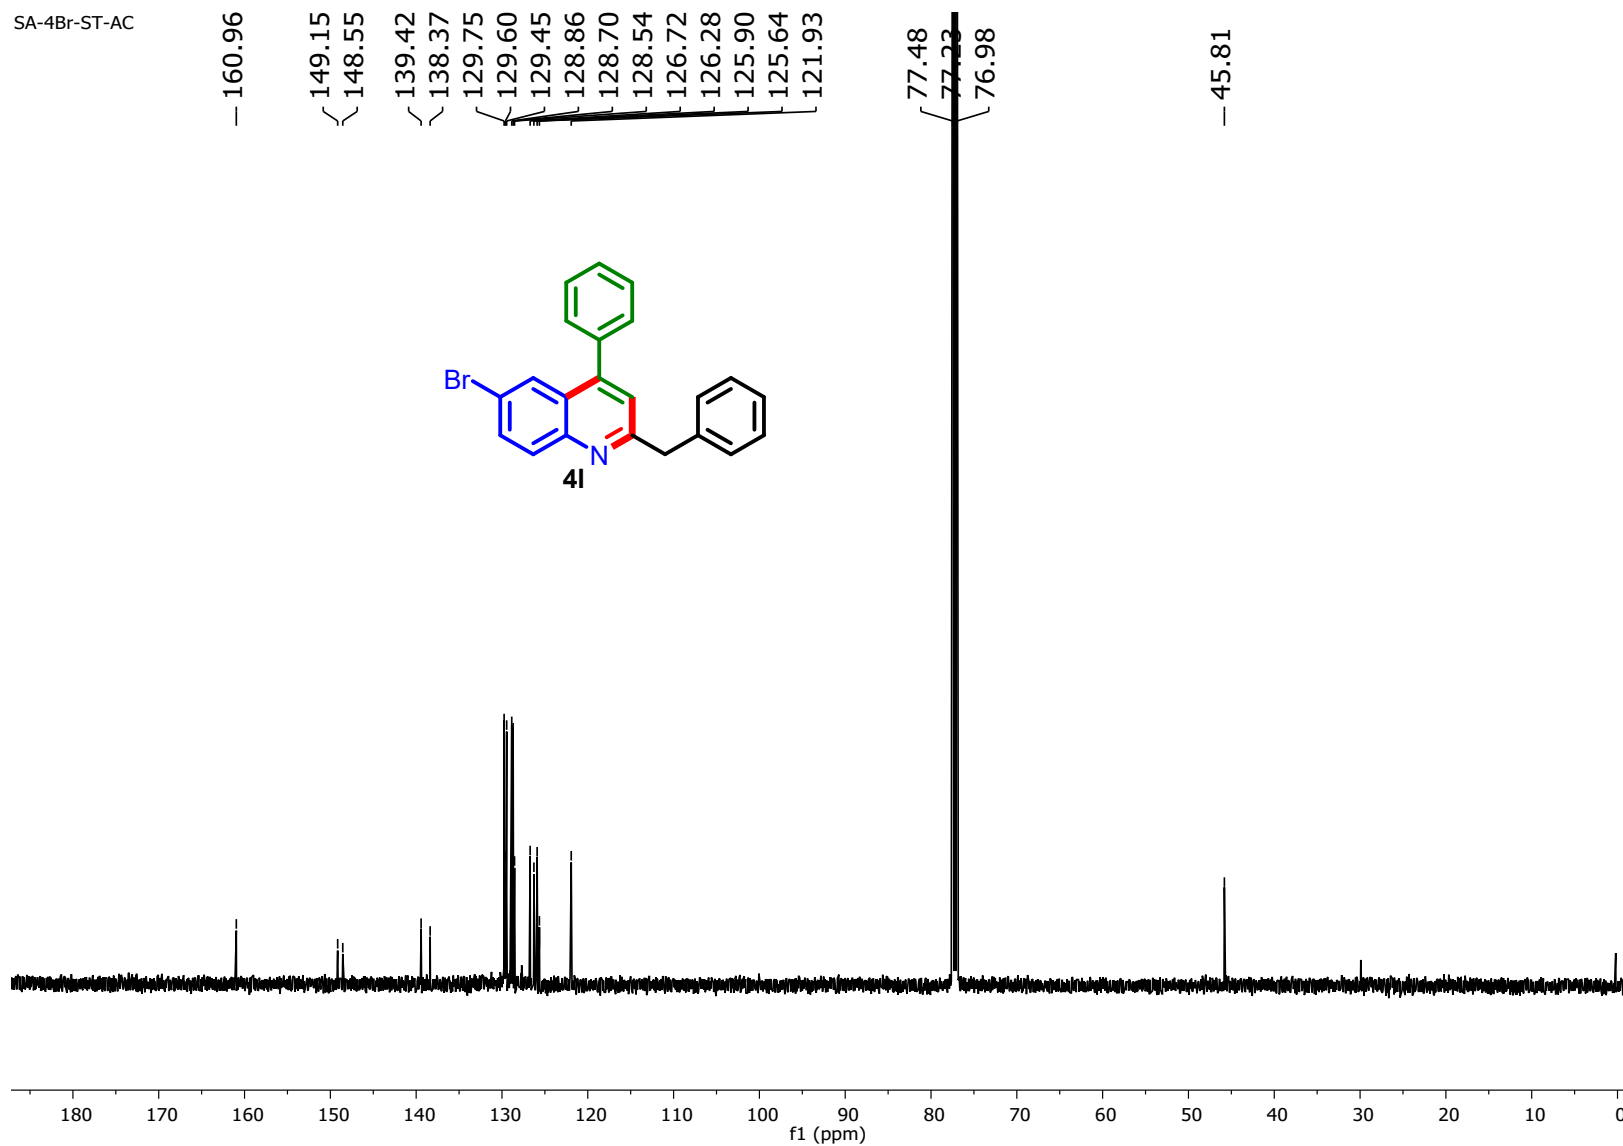

## HRMS spectrum of compound: 4l

|                    |                    |                               |         |                        |                                 |
|--------------------|--------------------|-------------------------------|---------|------------------------|---------------------------------|
| <b>Sample Name</b> | SAMPLE             | <b>Position</b>               | P1-C8   | <b>Instrument Name</b> | Instrument 1                    |
| <b>User Name</b>   |                    | <b>Inj Vol</b>                | 20      | <b>InjPosition</b>     |                                 |
| <b>Sample Type</b> | Sample             | <b>IRM Calibration Status</b> | Success | <b>Data Filename</b>   | SA-4BR-3.d                      |
| <b>ACQ Method</b>  | ESI ALS 100-1000.m | <b>Comment</b>                |         | <b>Acquired Time</b>   | 05-08-2021 12:48:11 (UTC+05:30) |

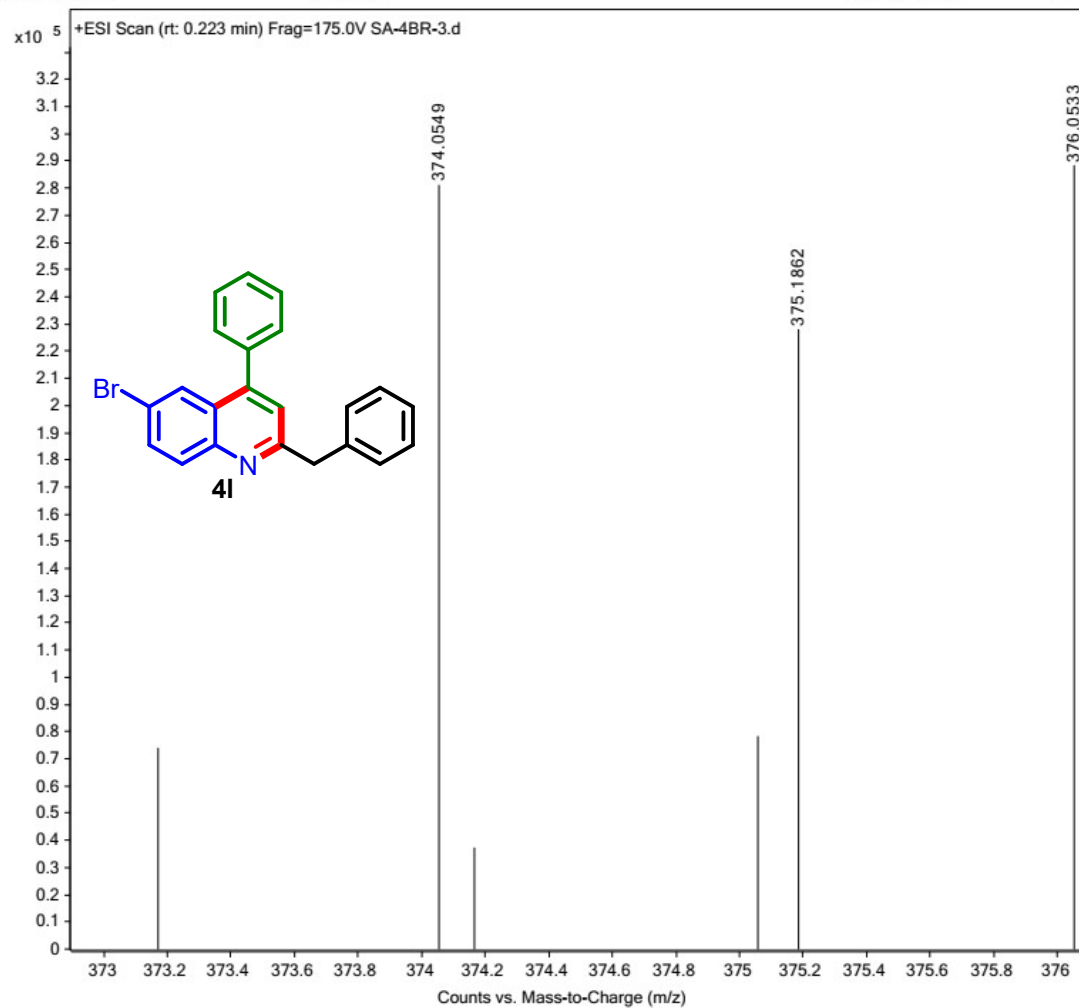



**<sup>1</sup>H NMR spectrum of compound: 5a**

SA-4OMe-4MeST-AC

8.08  
8.06  
7.50  
7.50  
7.49  
7.49  
7.49  
7.48  
7.48  
7.47  
7.46  
7.46  
7.45  
7.45  
7.45  
7.44  
7.44  
7.43  
7.39  
7.38  
7.37  
7.36  
7.24  
7.22  
7.16  
7.15  
7.14  
7.11  
7.10  
— 2.31

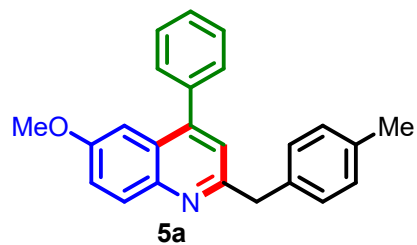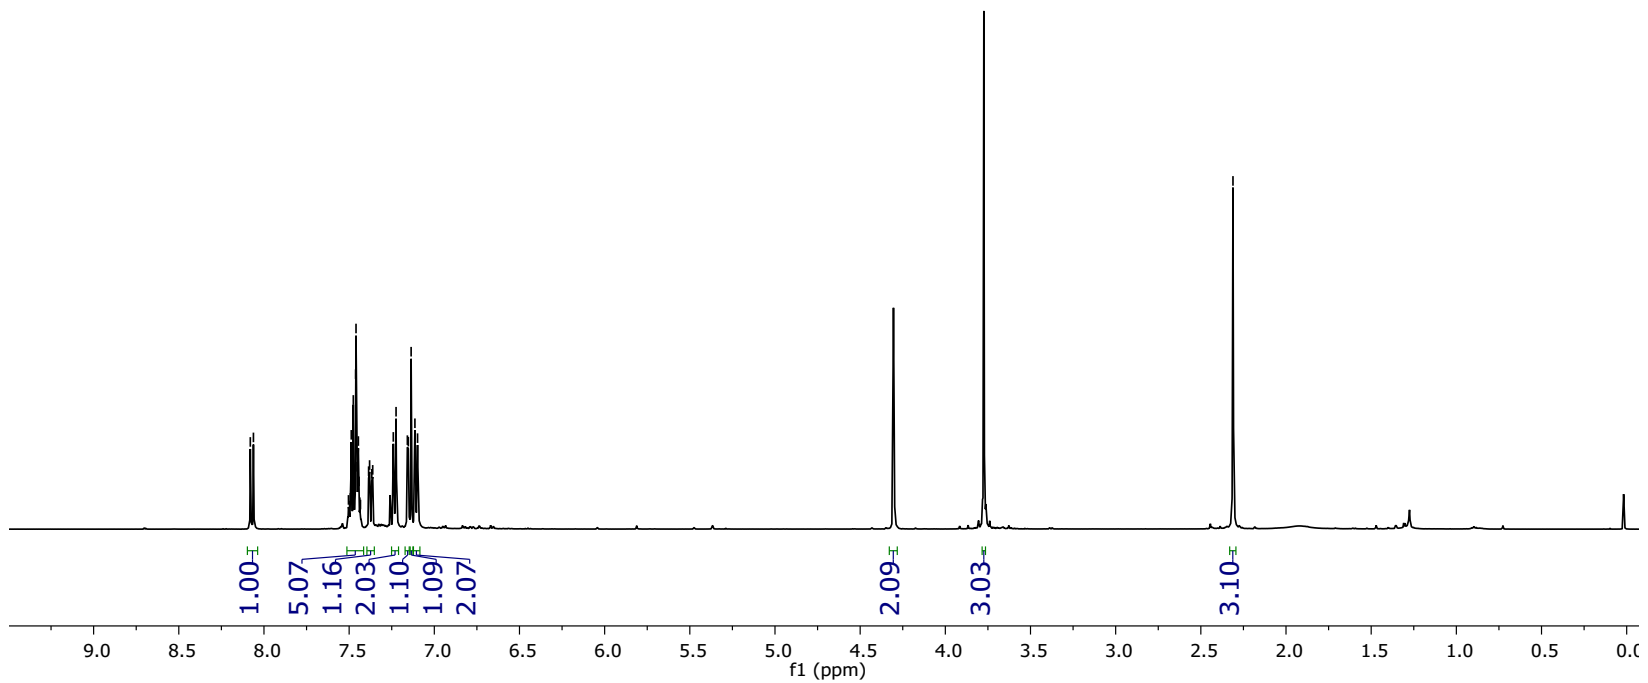

<sup>13</sup>C NMR spectrum of compound: 5a

SA-4OMe-4MeST-AC

158.71  
157.61  
147.77  
144.38  
138.58  
136.50  
136.12  
130.88  
129.49  
129.23  
128.75  
128.42  
126.34  
122.21  
121.66  
103.95  
77.44  
77.23  
77.02  
55.60  
45.03  
21.24

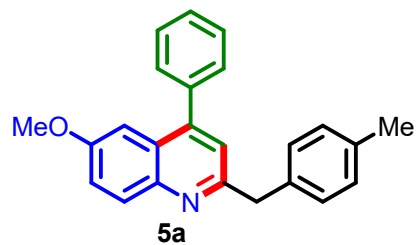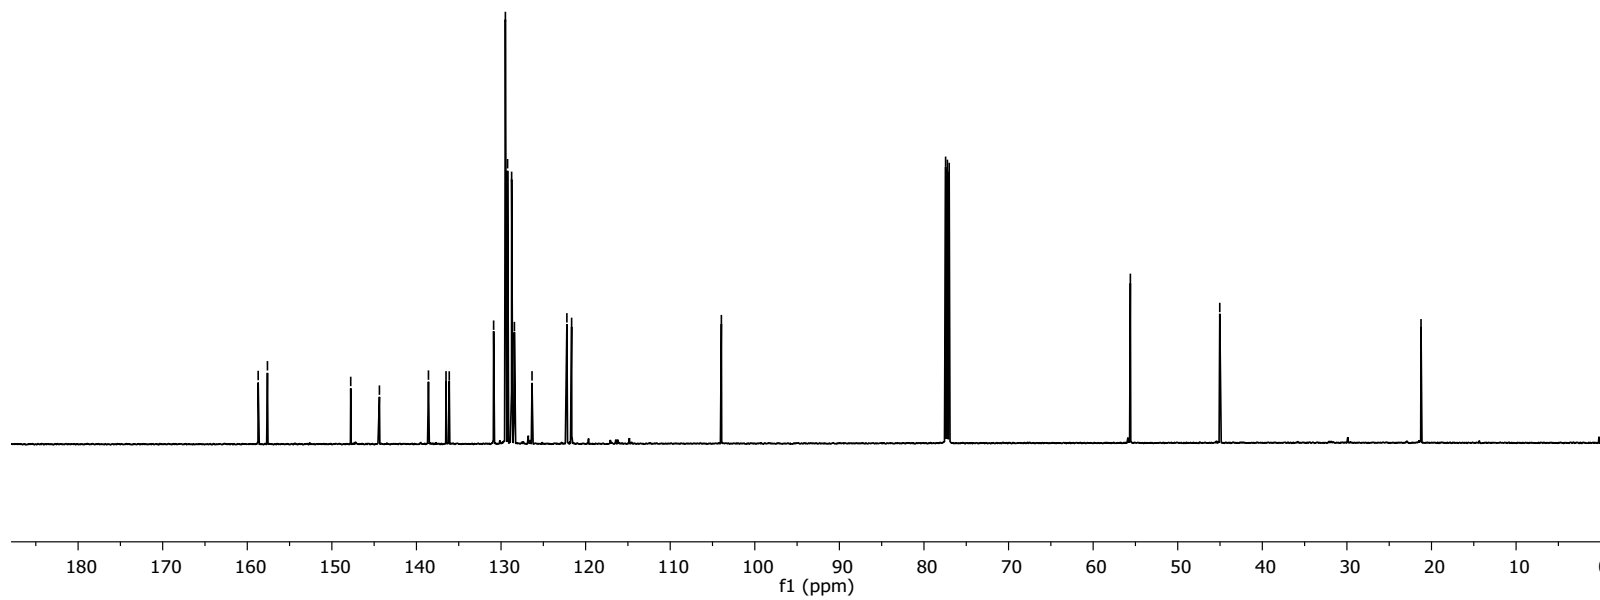

# HRMS spectrum of compound: 5a

Sample Name  
Inj Vol  
Data Filename

Position  
InjPosition  
ACQ Method

Instrument Name  
SampleType  
Comment

User Name  
IRM Calibration Status  
Acquired Time

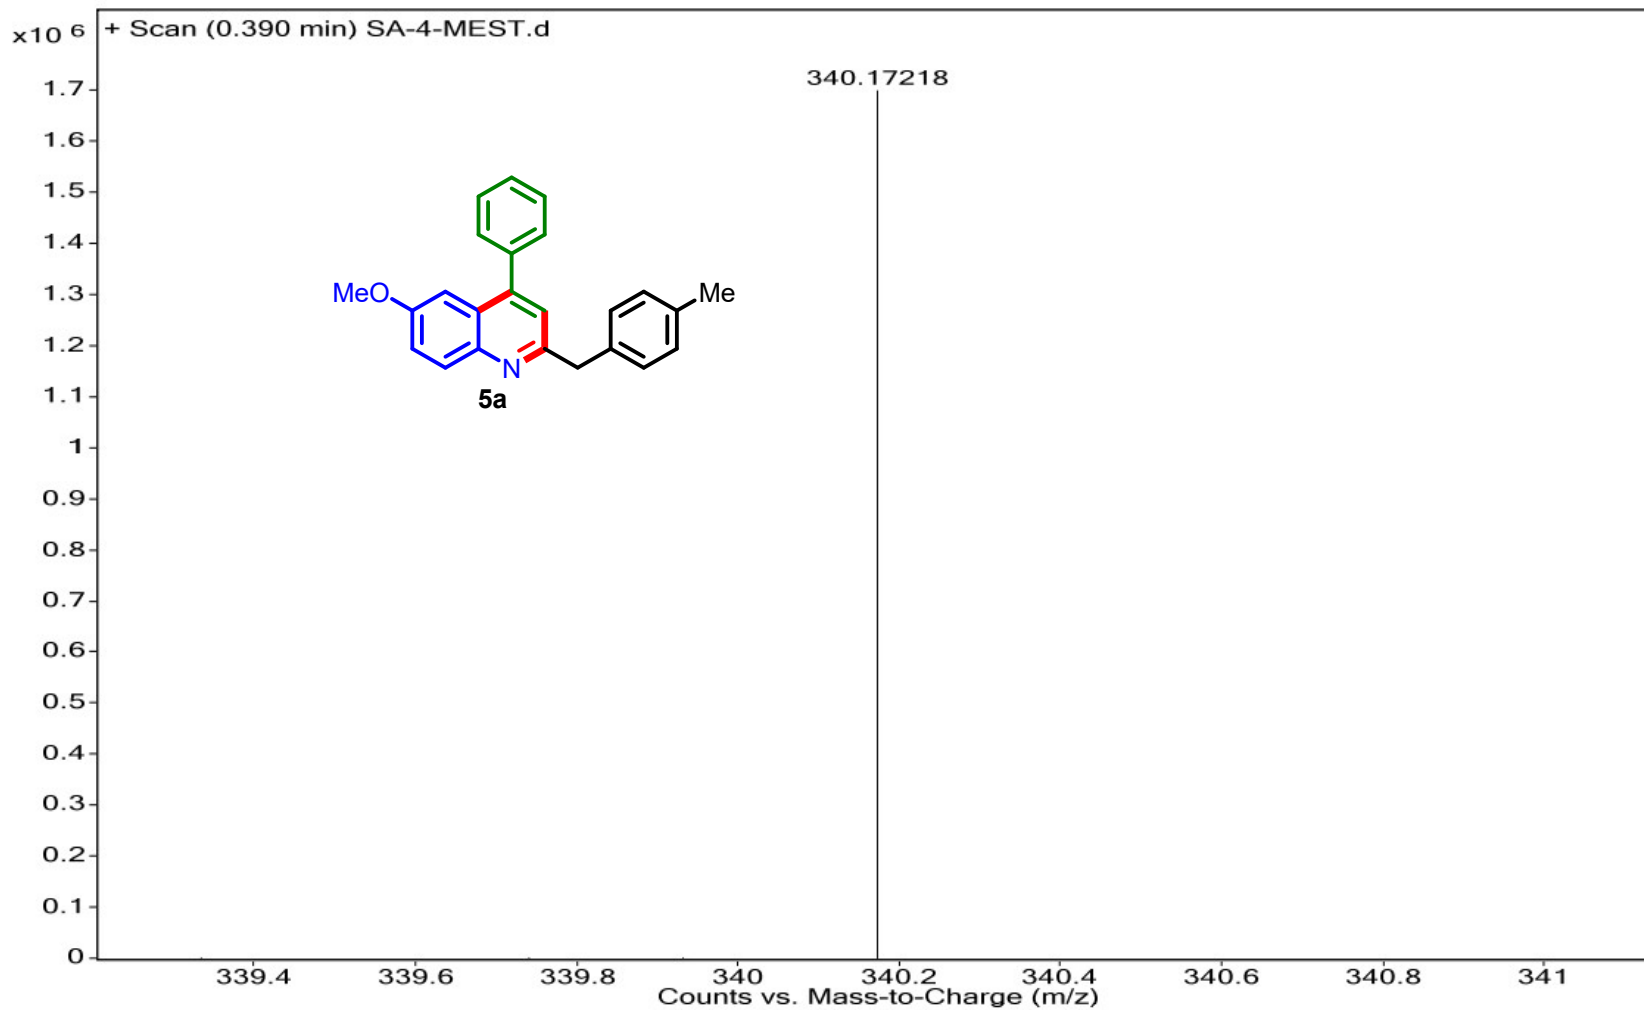

**<sup>1</sup>H NMR spectrum of compound: 5b**

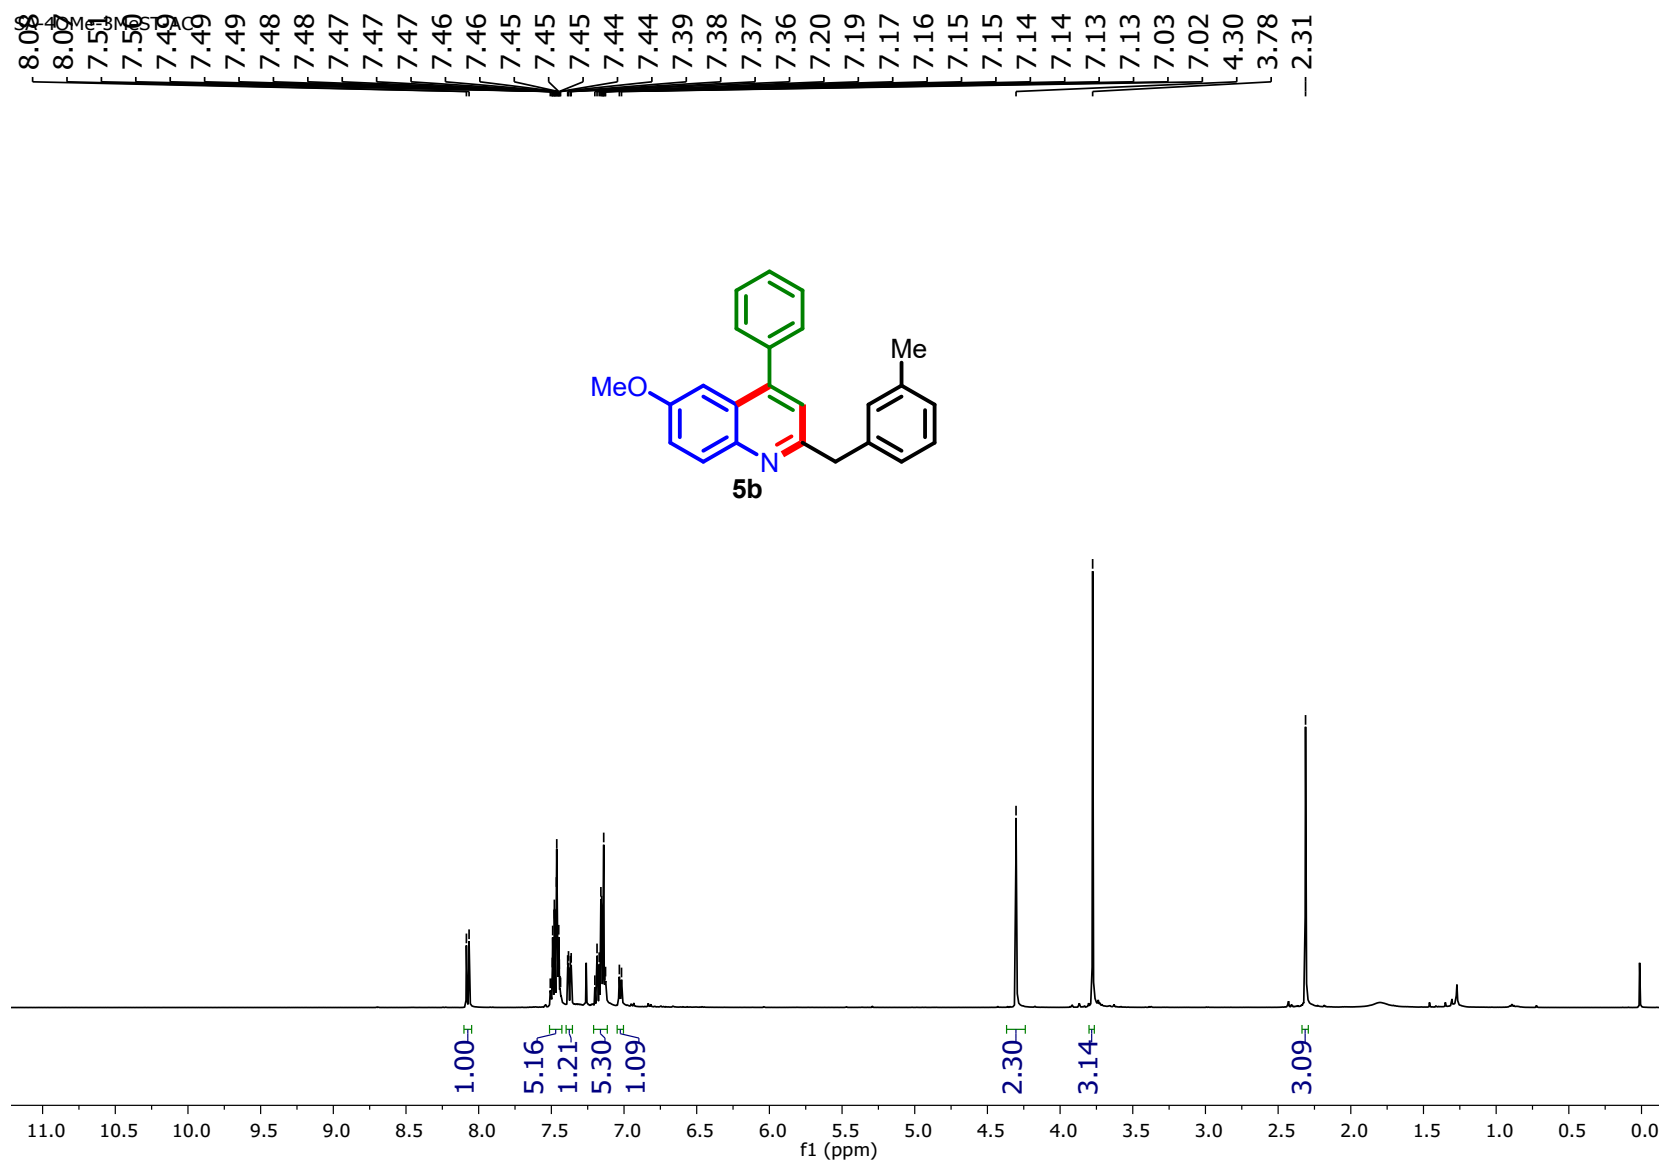

**<sup>13</sup>C NMR spectrum of compound: 5b**

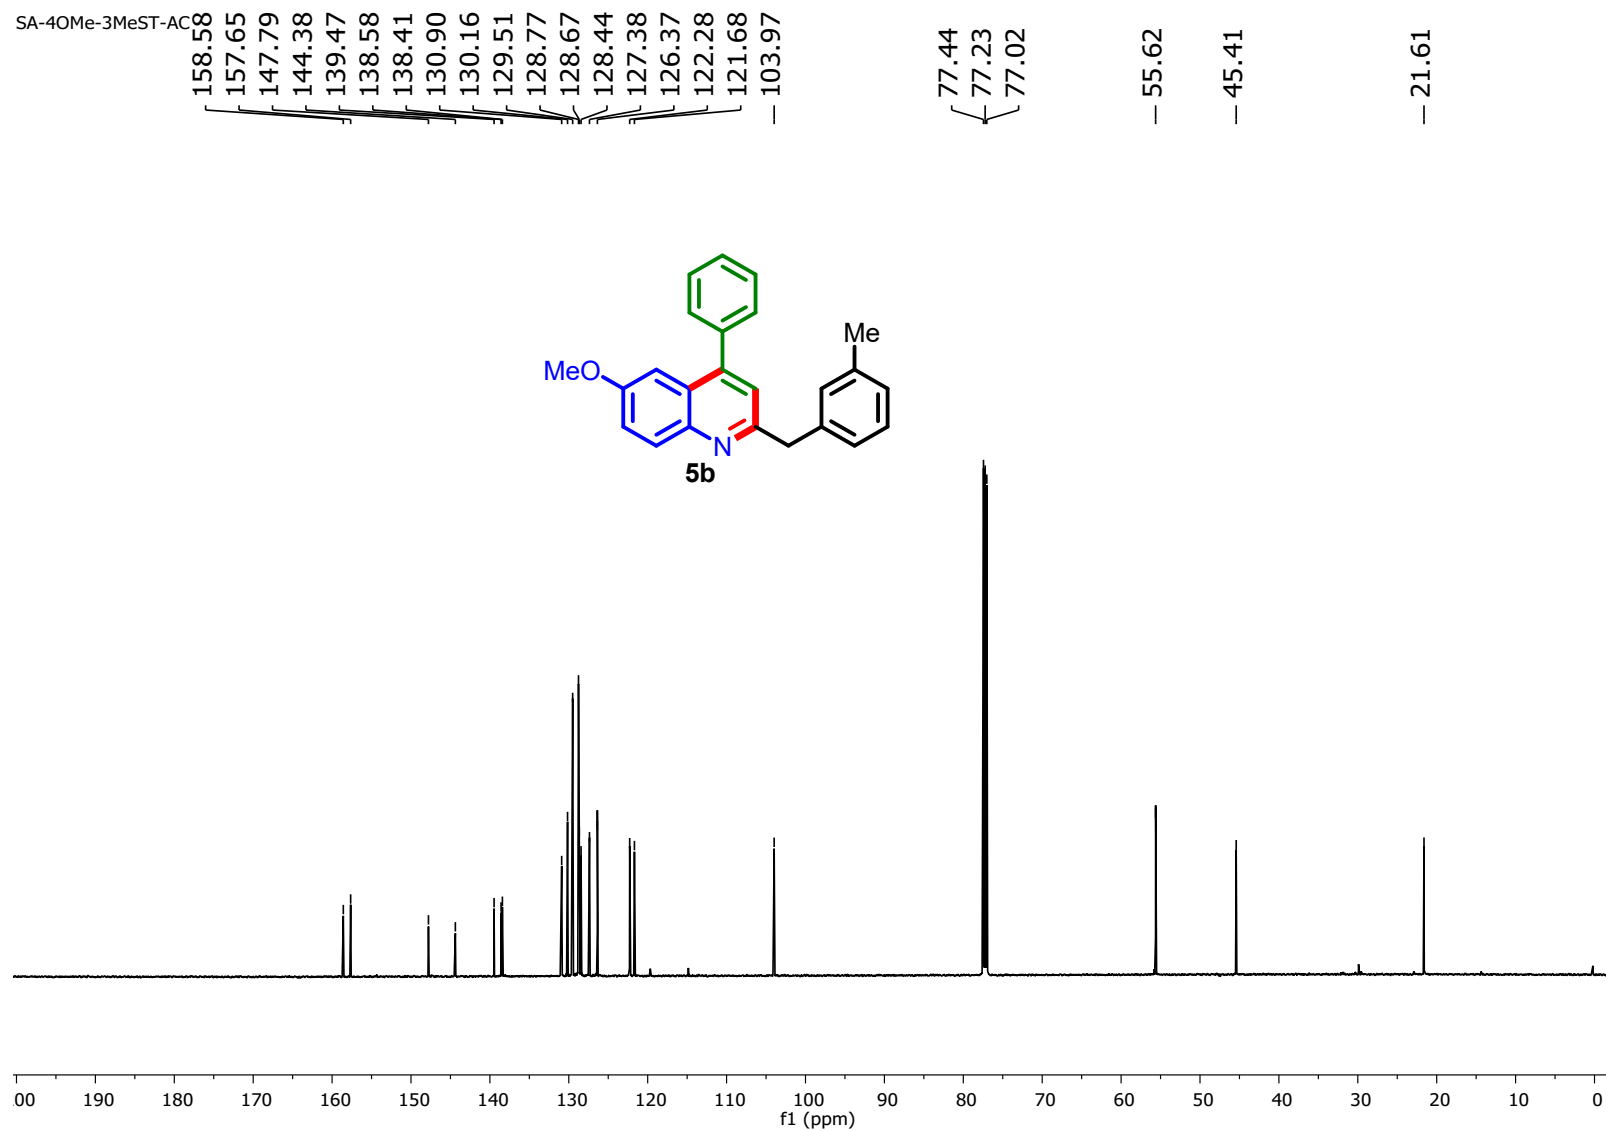

# HRMS spectrum of compound: 5b

Sample Name  
Inj Vol  
Data Filename

Position  
InjPosition  
ACQ Method

Instrument Name  
SampleType  
Comment

User Name  
IRM Calibration Status  
Acquired Time

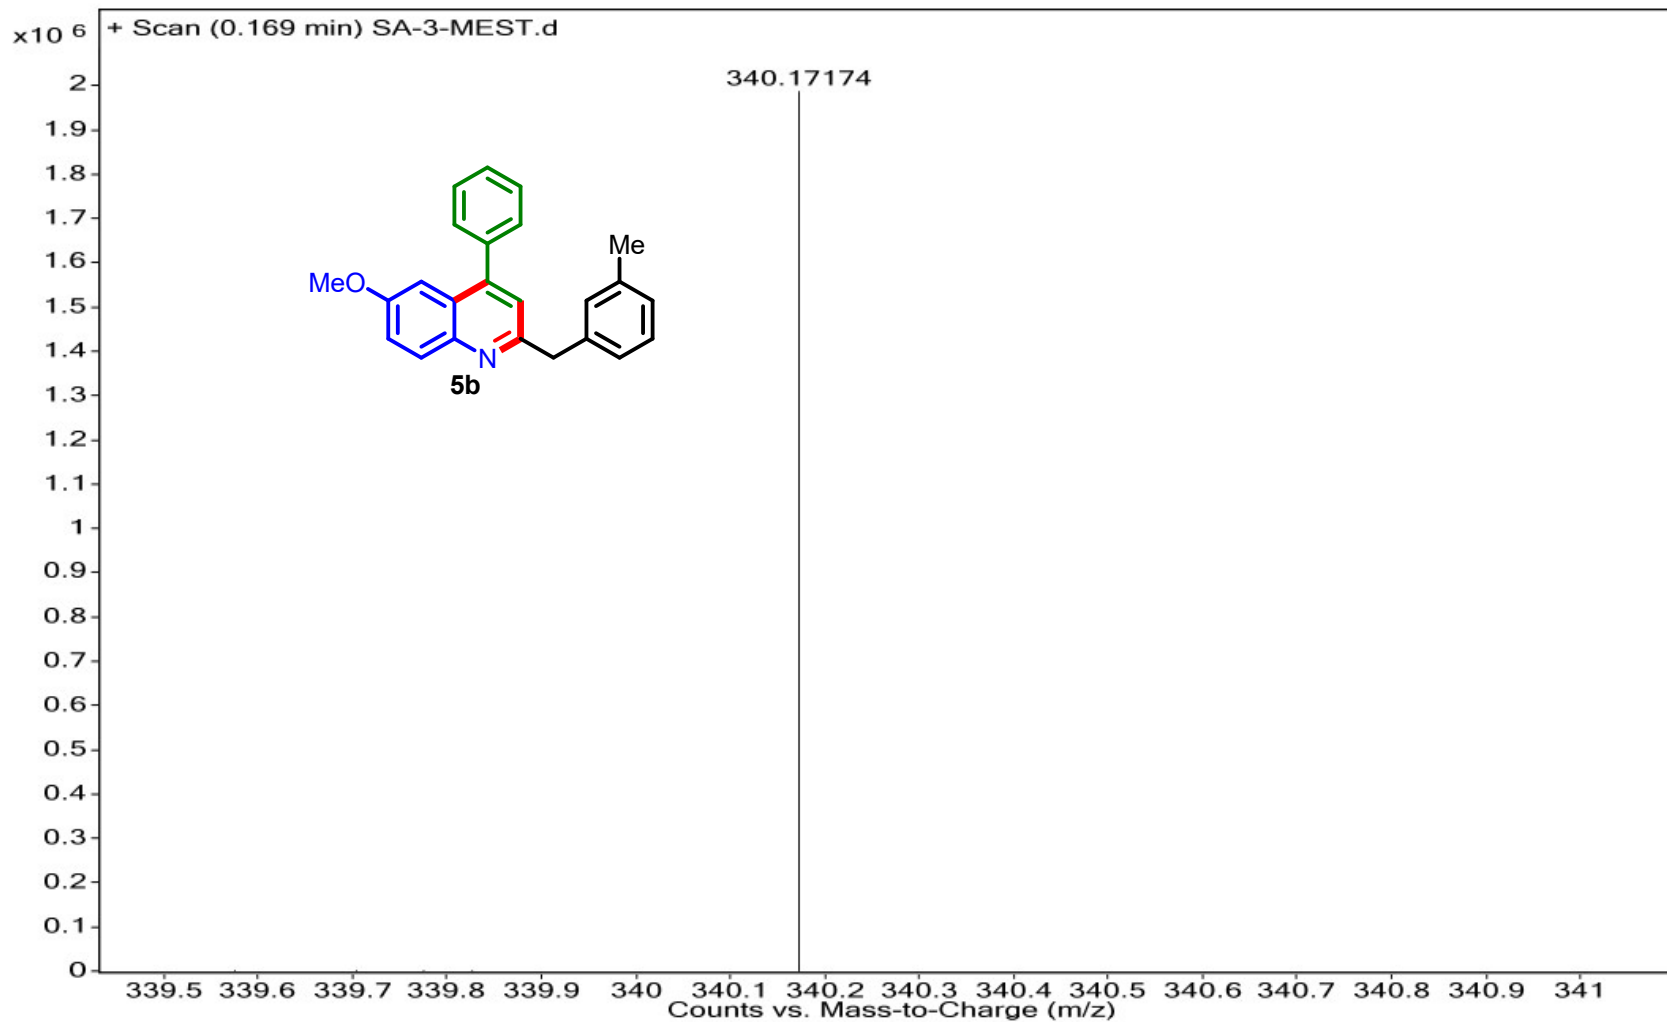

<sup>1</sup>H NMR spectrum of compound: 5c

SA-4OMe-4BrST-AC

8.05  
8.03  
7.50  
7.49  
7.47  
7.46  
7.45  
7.43  
7.40  
7.39  
7.38  
7.36  
7.20  
7.19  
7.15  
7.09

4.26

3.76

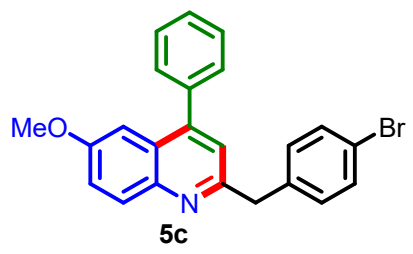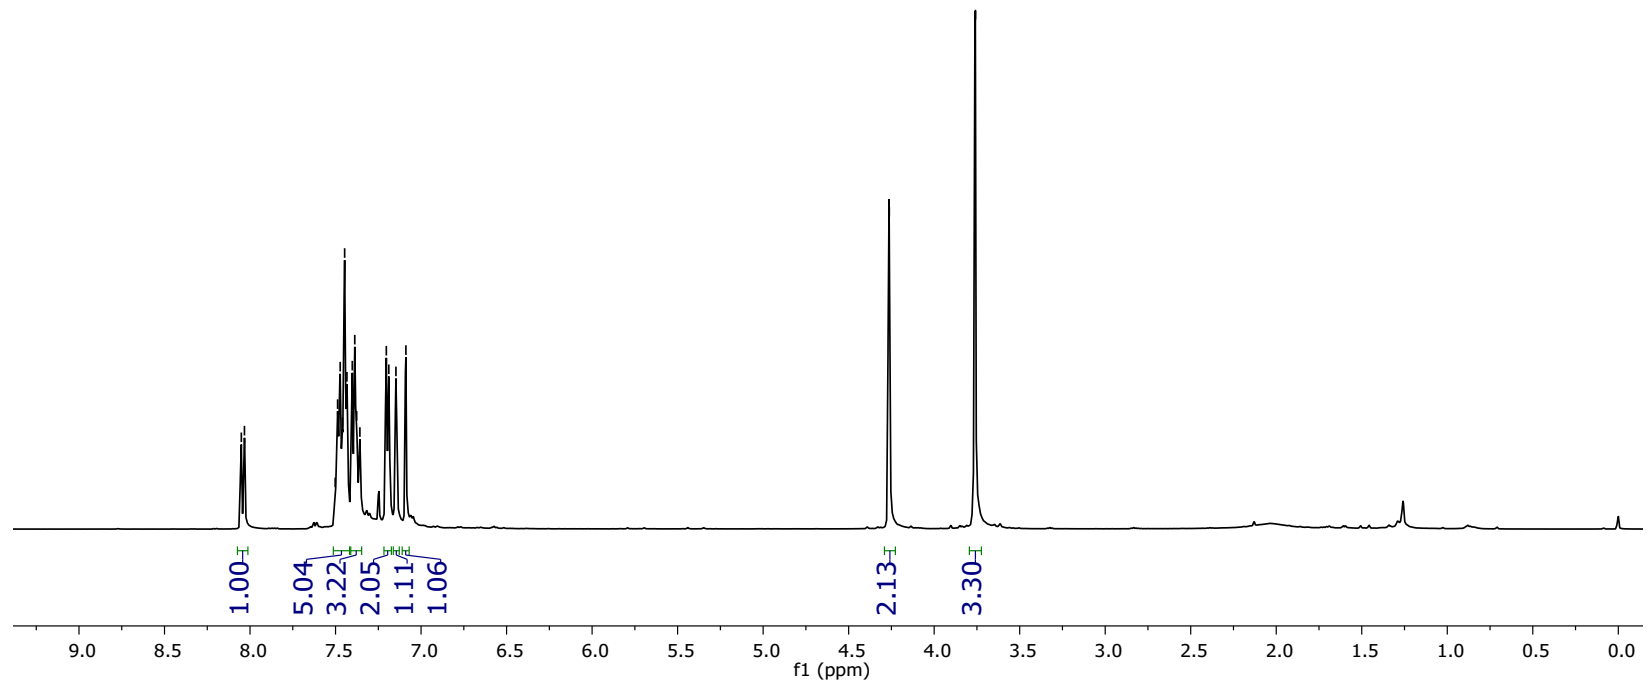

<sup>13</sup>C NMR spectrum of compound: 5c

SA-4OMe-4BrST-AC

157.87  
157.70  
148.06  
144.57  
138.67  
138.54  
131.86  
131.08  
130.98  
129.47  
128.82  
128.54  
126.49  
122.06  
121.84  
120.57  
— 104.14  
  
77.48  
77.23  
76.98  
  
— 55.63  
  
— 44.78

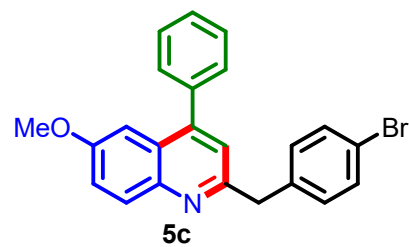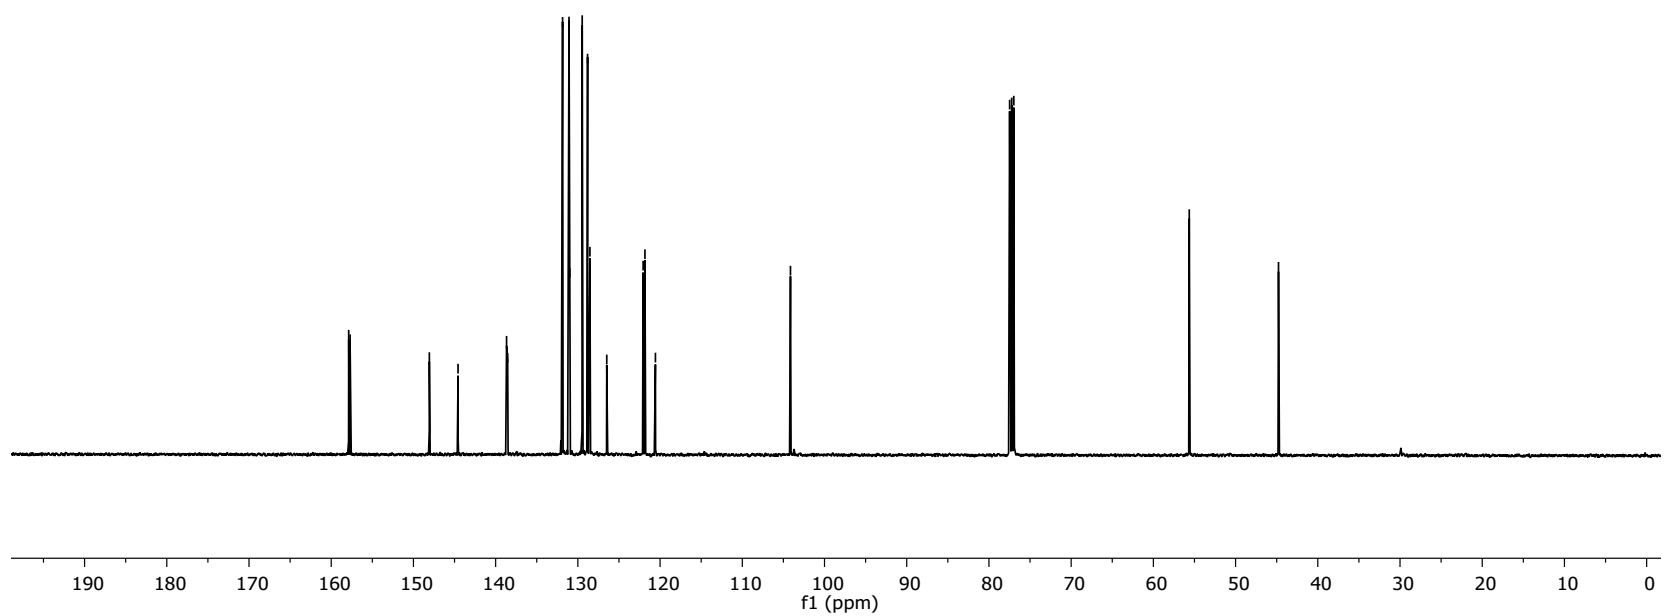



# HRMS spectrum of compound: 5c

|                    |                    |                               |         |                        |                                 |
|--------------------|--------------------|-------------------------------|---------|------------------------|---------------------------------|
| <b>Sample Name</b> | SAMPLE             | <b>Position</b>               | P1-D7   | <b>Instrument Name</b> | Instrument 1                    |
| <b>User Name</b>   |                    | <b>Inj Vol</b>                | 5       | <b>InjPosition</b>     |                                 |
| <b>Sample Type</b> | Sample             | <b>IRM Calibration Status</b> | Success | <b>Data Filename</b>   | SA-4BR-ST.d                     |
| <b>ACQ Method</b>  | ESI ALS 100-1000.m | <b>Comment</b>                |         | <b>Acquired Time</b>   | 26-07-2021 12:56:08 (UTC+05:30) |

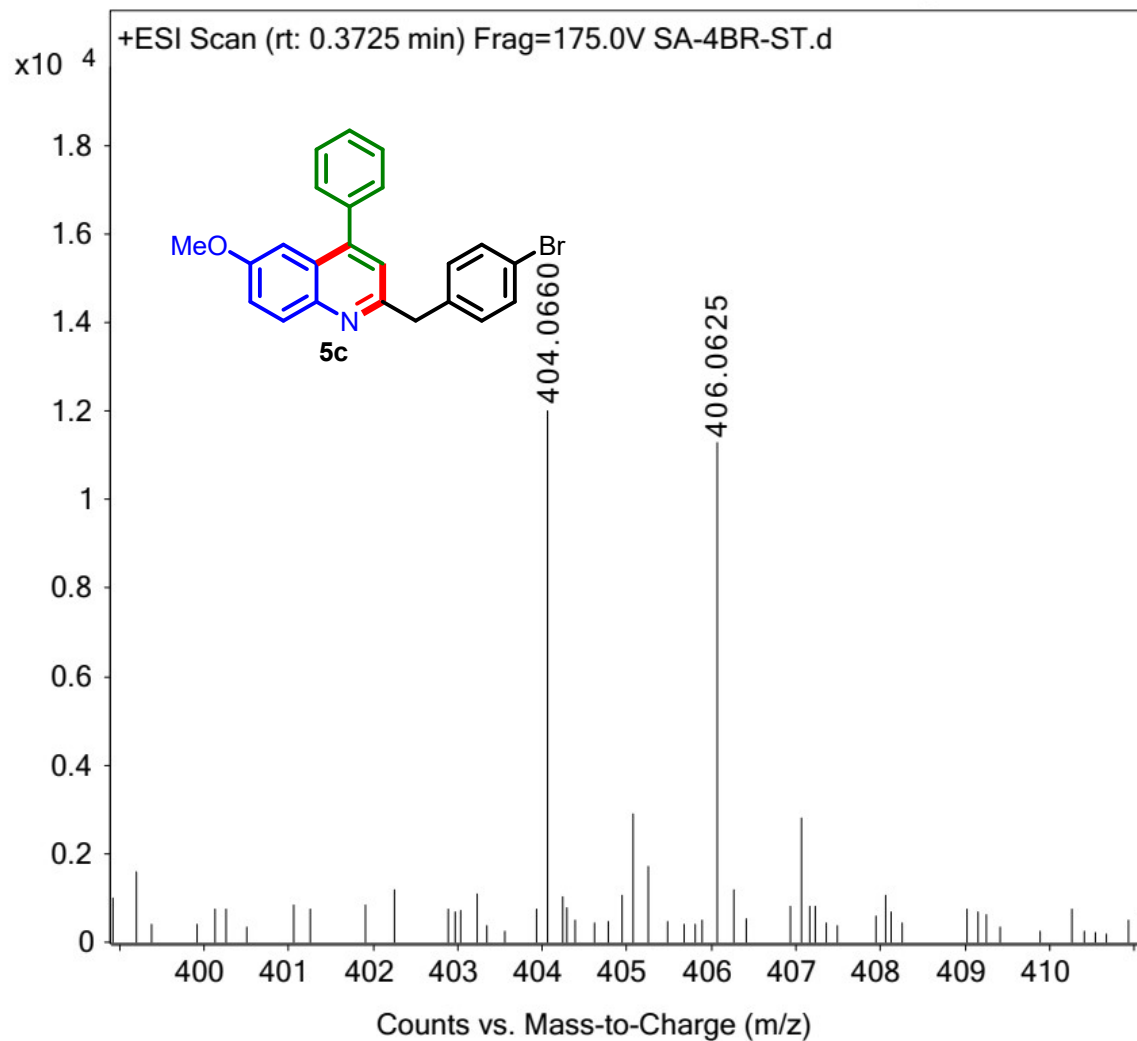

<sup>1</sup>H NMR spectrum of compound: 5d

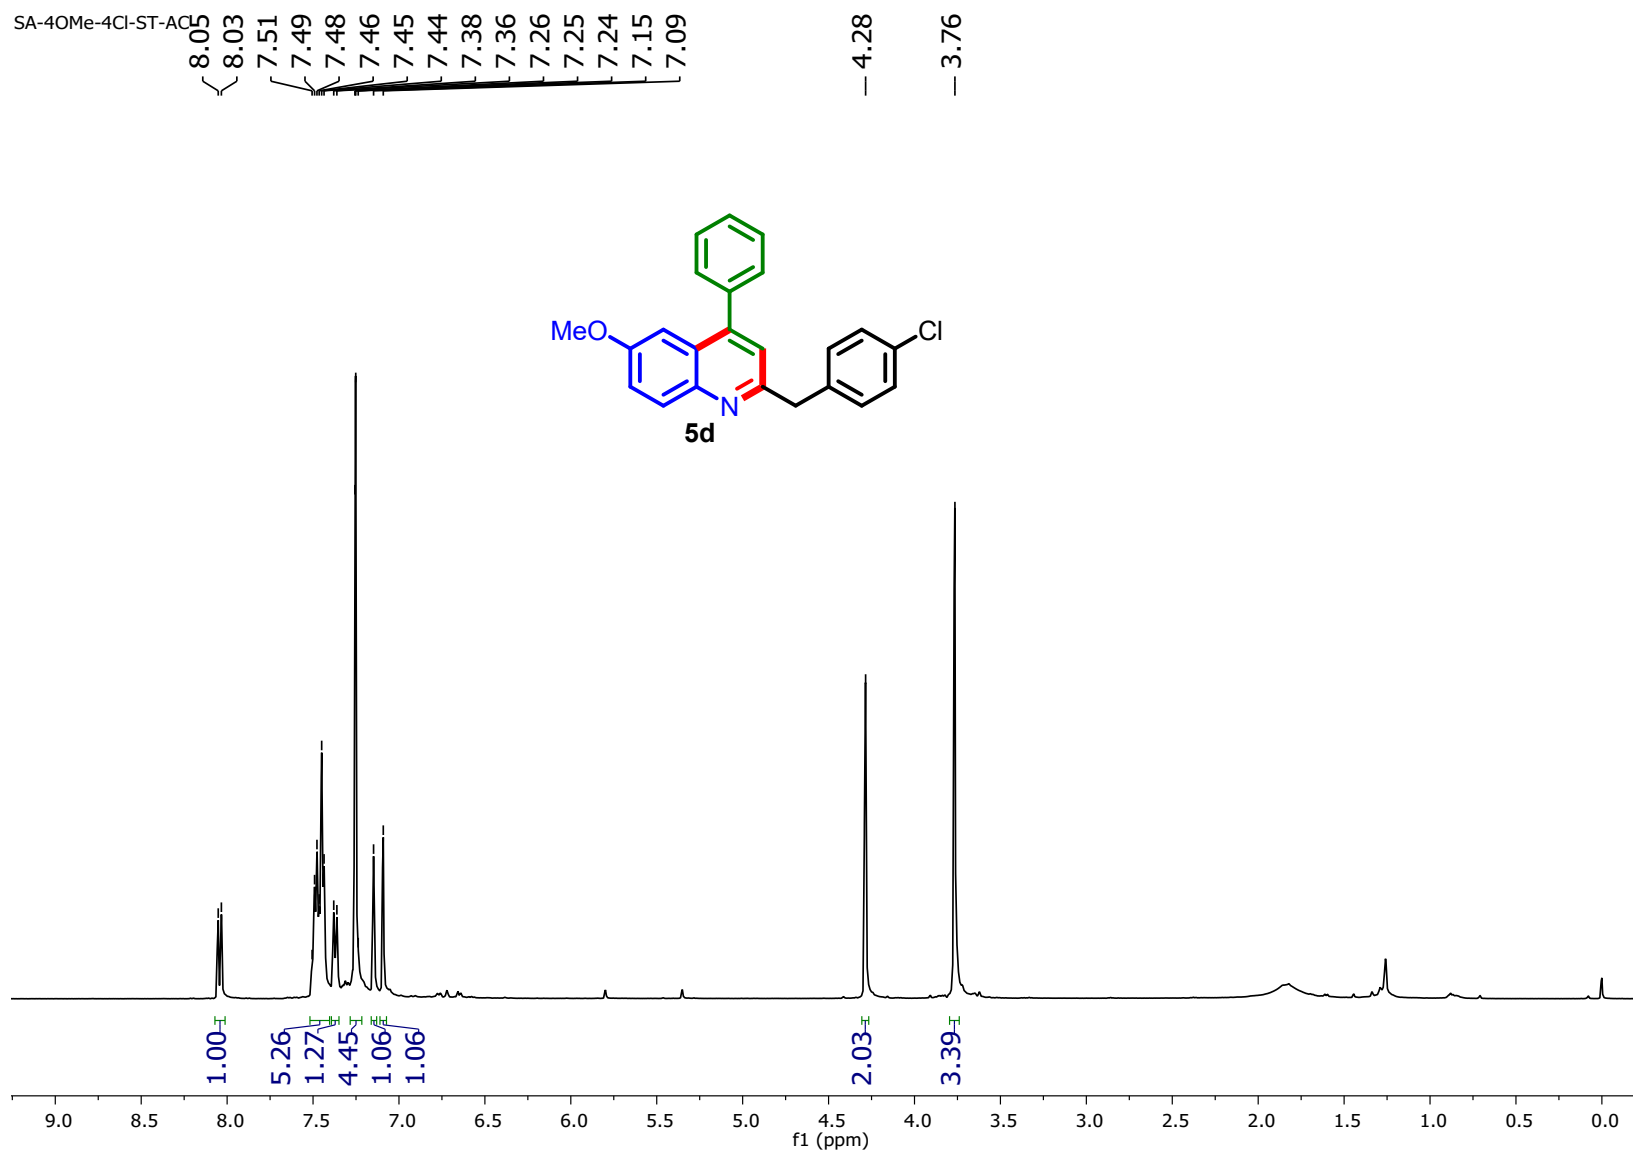

<sup>13</sup>C NMR spectrum of compound: 5d

SA-4OMe-4Cl-ST-AC

157.88  
157.83  
148.06  
144.59  
138.57  
138.17  
132.51  
131.00  
130.69  
129.49  
128.92  
128.83  
128.54  
126.49  
122.08  
121.84  
— 104.15

77.48  
77.23  
76.98

— 55.65

— 44.74

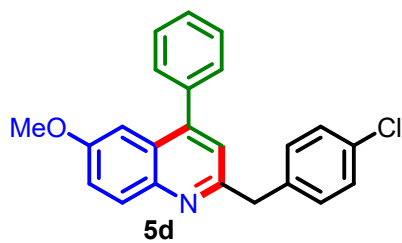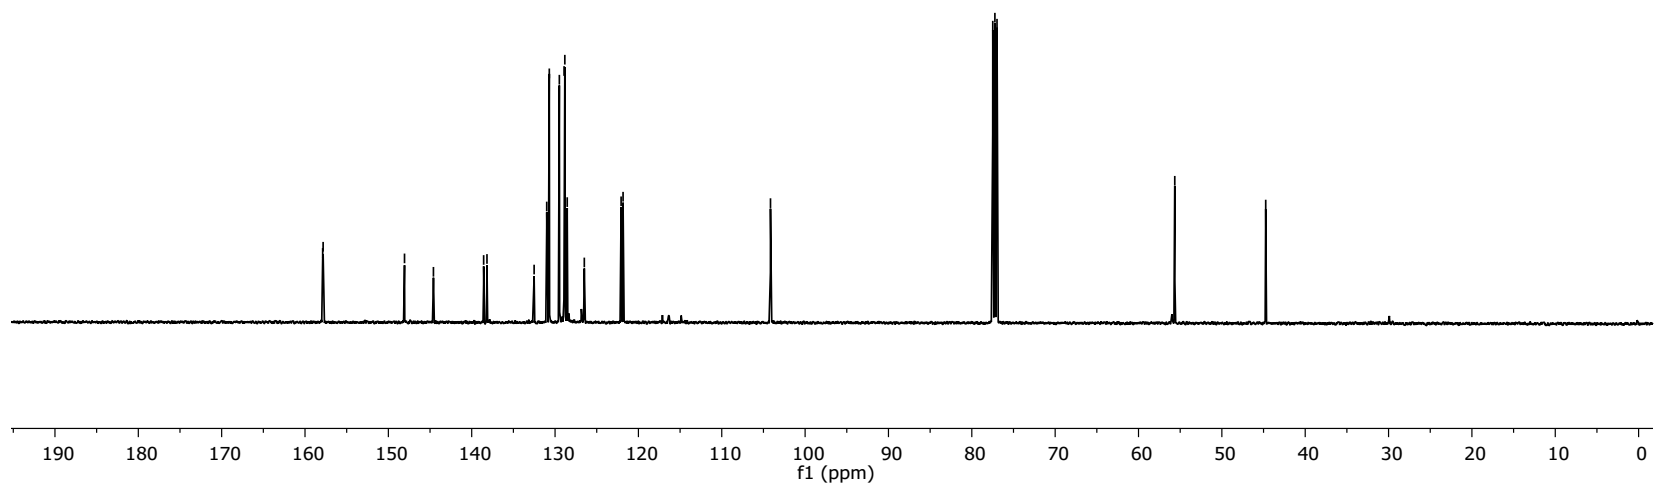

# HRMS spectrum of compound: 5d

Sample Name  
Inj Vol  
Data Filename

Position  
InjPosition  
ACQ Method

Instrument Name  
SampleType  
Comment

User Name  
IRM Calibration Status  
Acquired Time

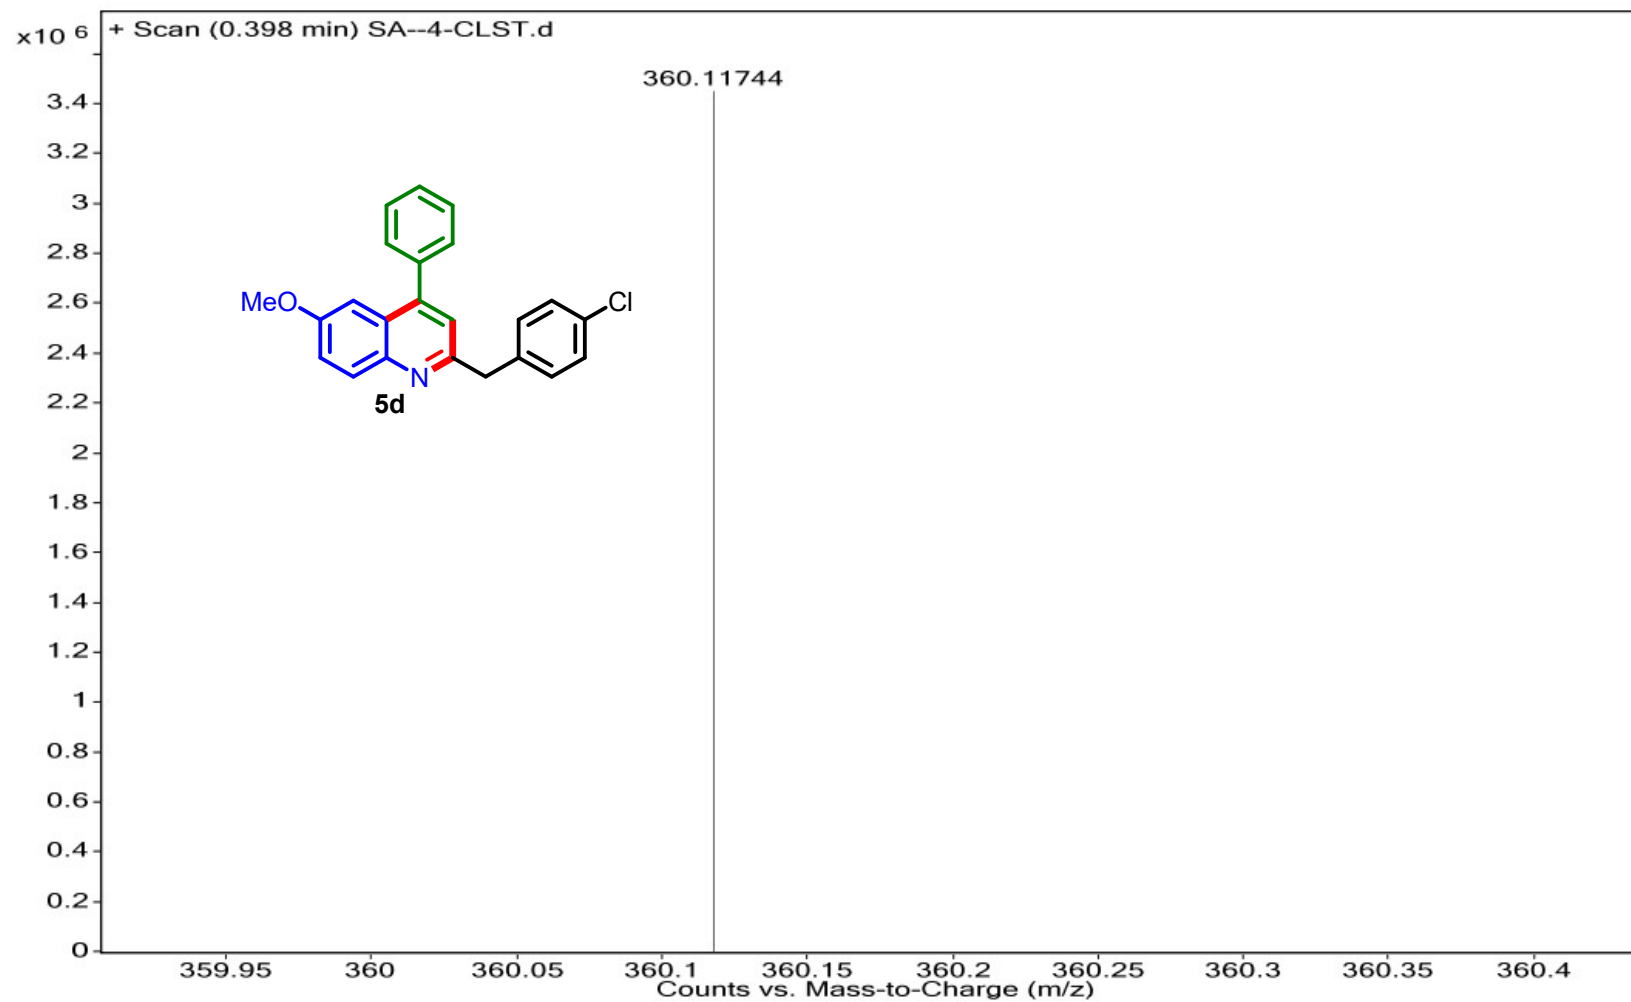

**<sup>1</sup>H NMR spectrum of compound: 5e**

SA-4OMe-ST-4OMe

8.08  
8.07  
8.06  
8.06  
7.40  
7.39  
7.38  
7.38  
7.37  
7.36  
7.35  
7.34  
7.33  
7.31  
7.30  
7.29  
7.22  
7.21  
7.19  
7.19  
7.11  
7.02  
7.01  
4.33  
3.88  
3.79

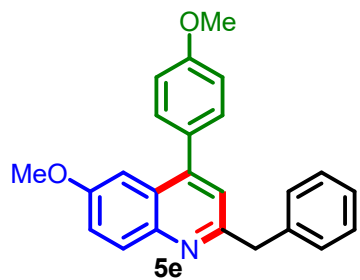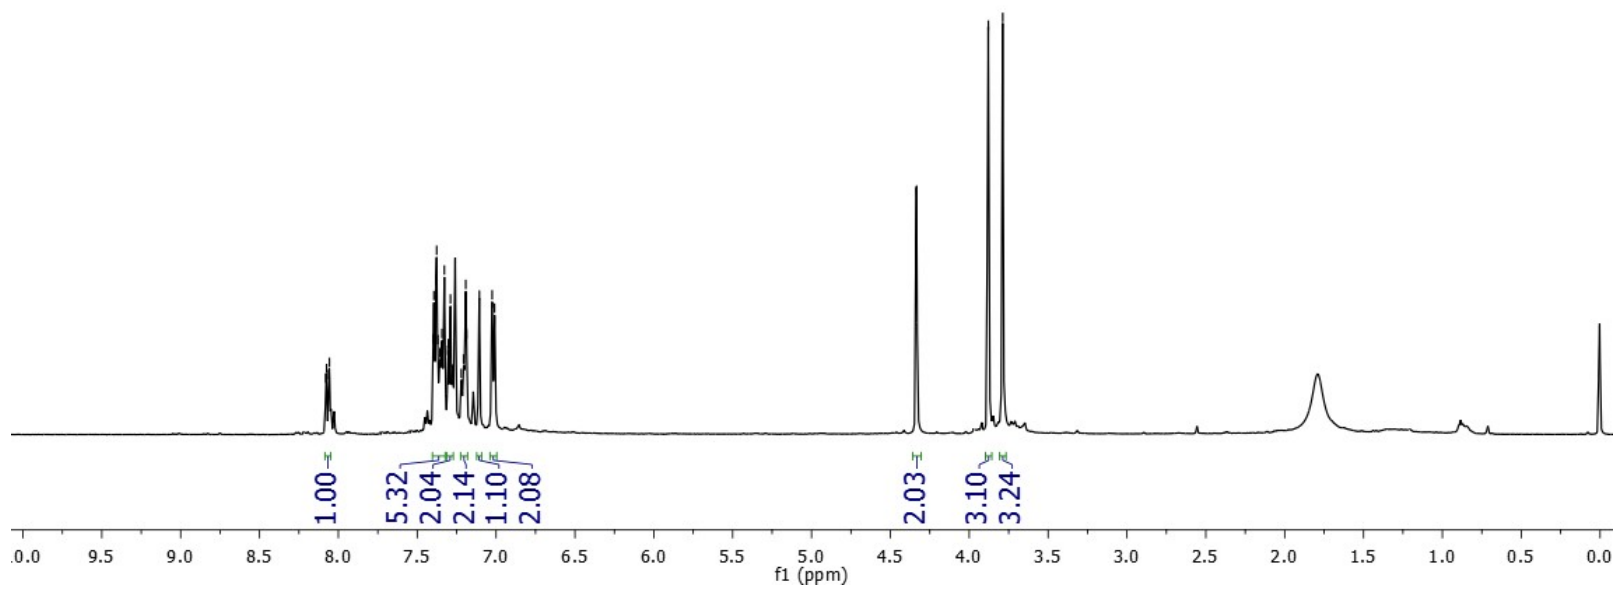

<sup>13</sup>C NMR spectrum of compound: 5e

SA-4OMe-ST-4OMeAC

158.42  
157.76  
147.65  
144.45  
139.68  
132.36  
130.94  
130.89  
130.75  
129.41  
128.81  
127.66  
126.62  
122.20  
121.69  
114.30  
-104.23

77.48  
77.23  
76.98  
55.68  
55.59  
-45.40

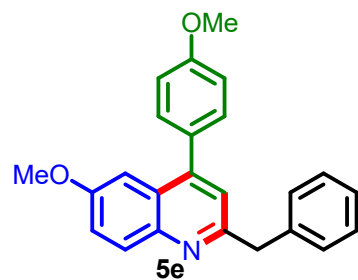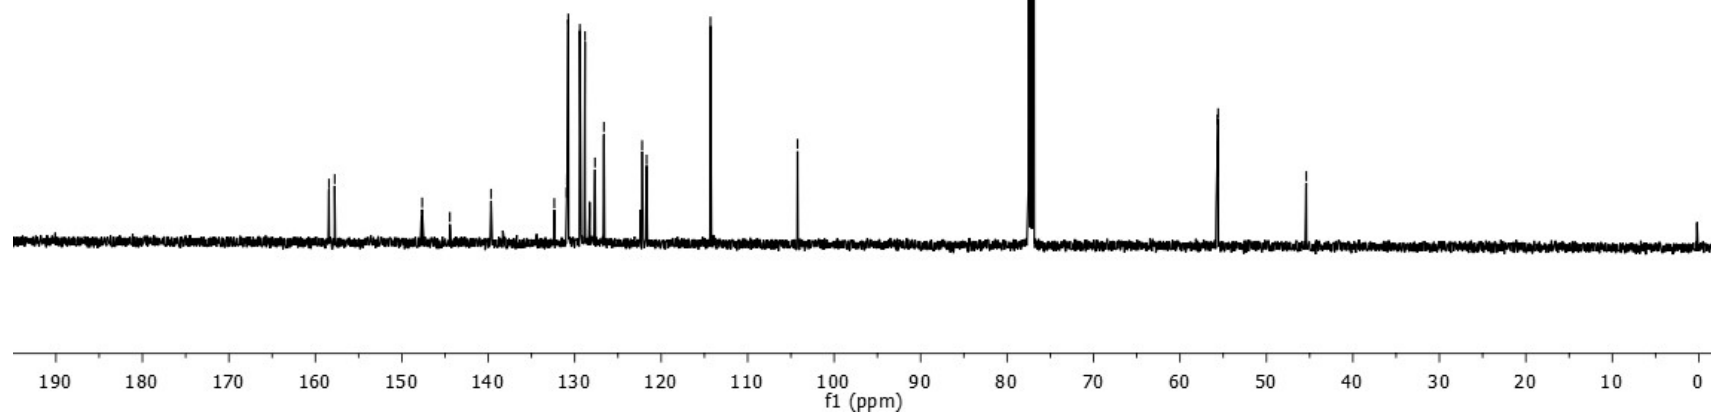

# HRMS spectrum of compound: 5e

Sample Name  
Inj Vol  
Data Filename

Position  
InjPosition  
ACQ Method

Instrument Name  
SampleType  
Comment

User Name  
IRM Calibration Status  
Acquired Time

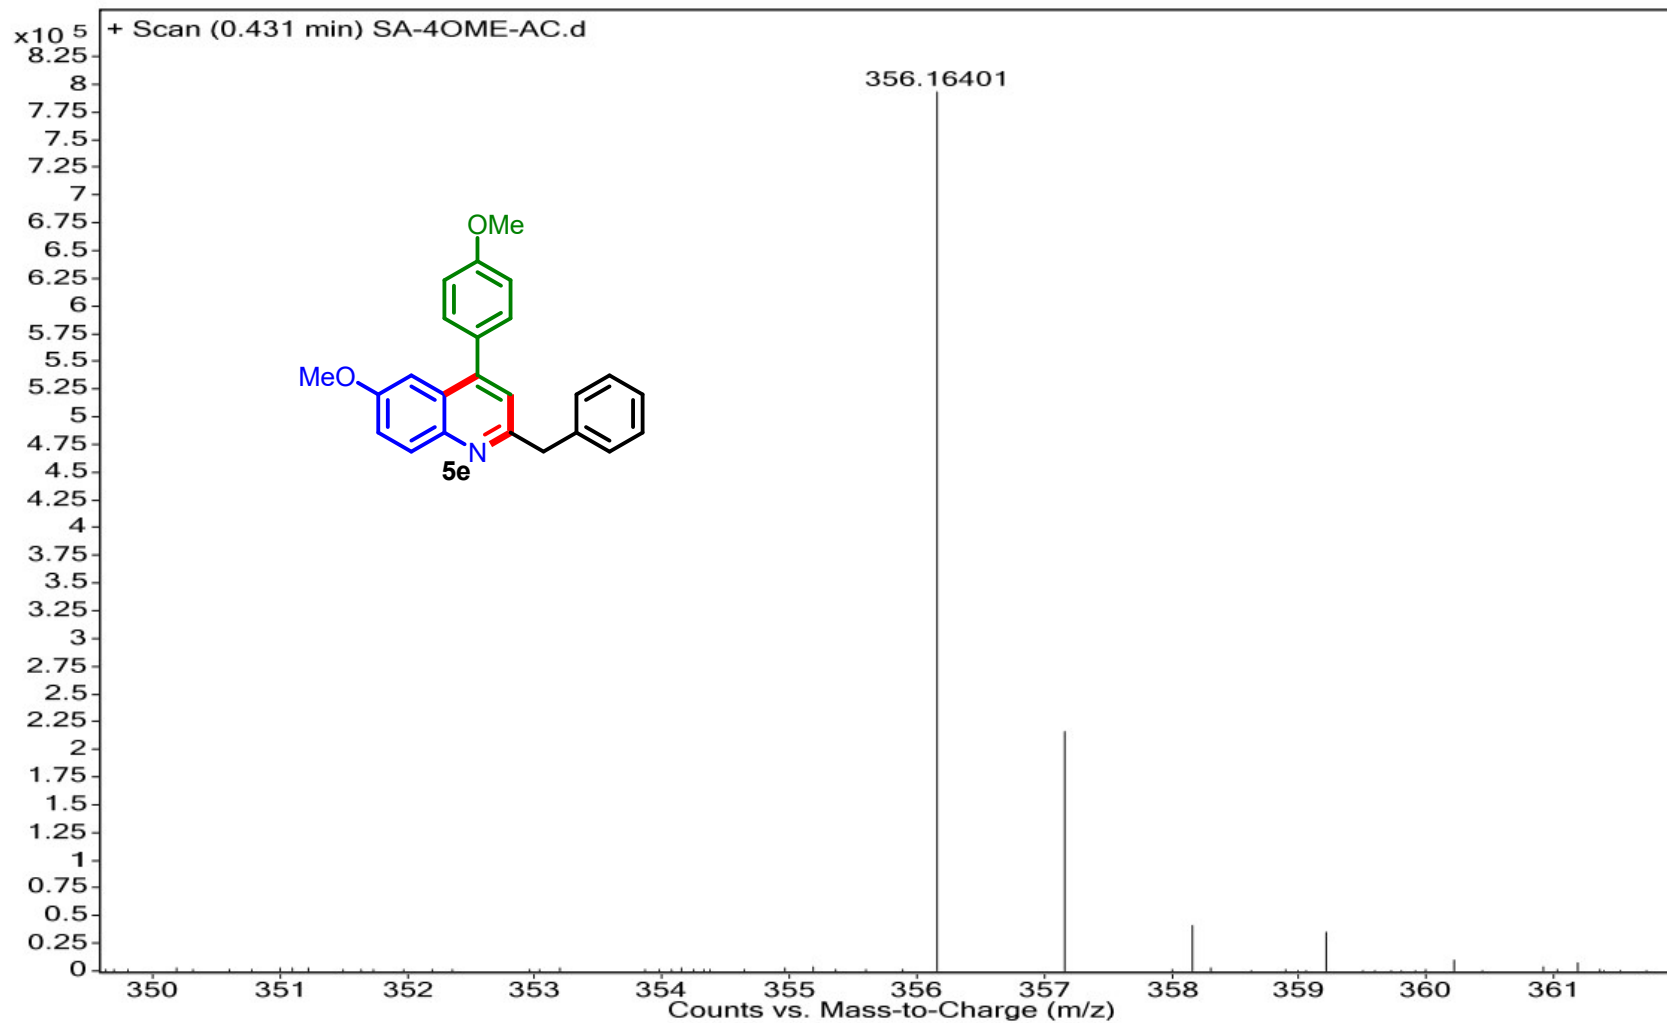

<sup>1</sup>H NMR spectrum of compound: 5f

SA-4OMe-ST-4MeAC-1H

8.06  
8.04  
7.37  
7.35  
7.35  
7.35  
7.34  
7.33  
7.32  
7.30  
7.28  
7.28  
7.27  
7.27  
7.25  
7.18  
7.11  
7.11  
-4.32  
-3.78  
-2.43

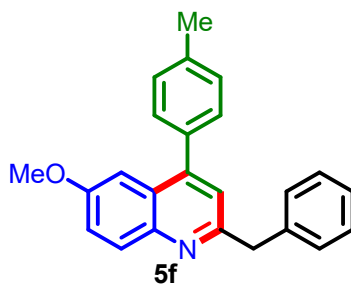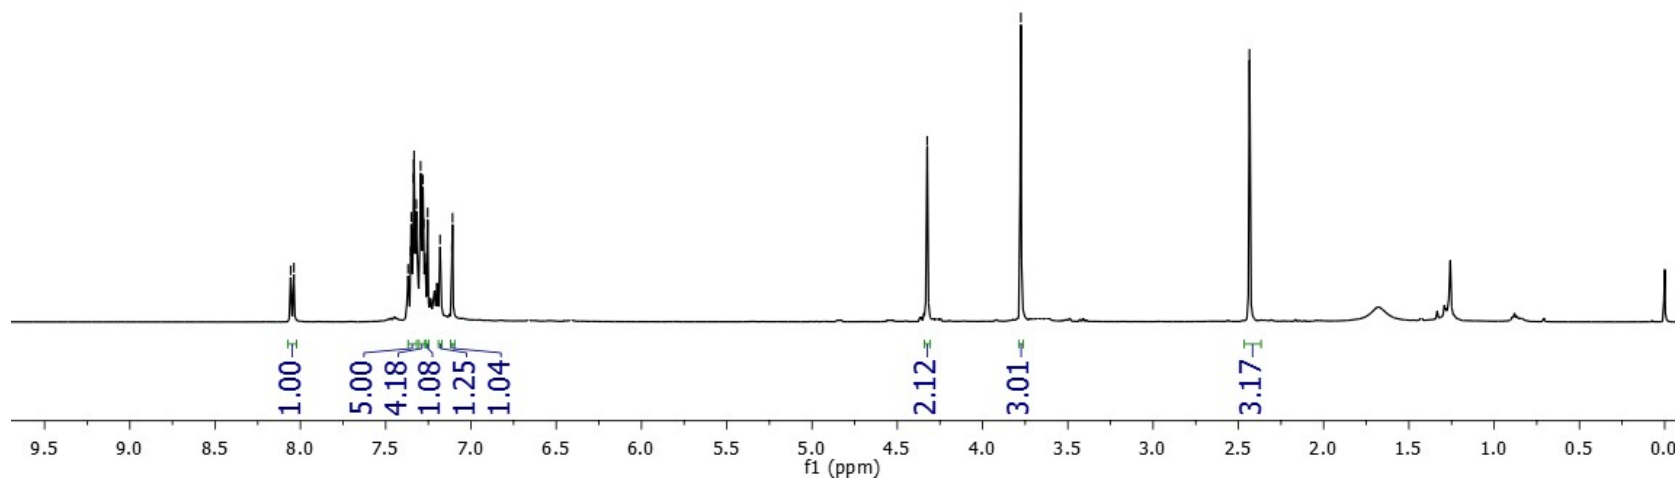



<sup>13</sup>C NMR spectrum of compound: 5f

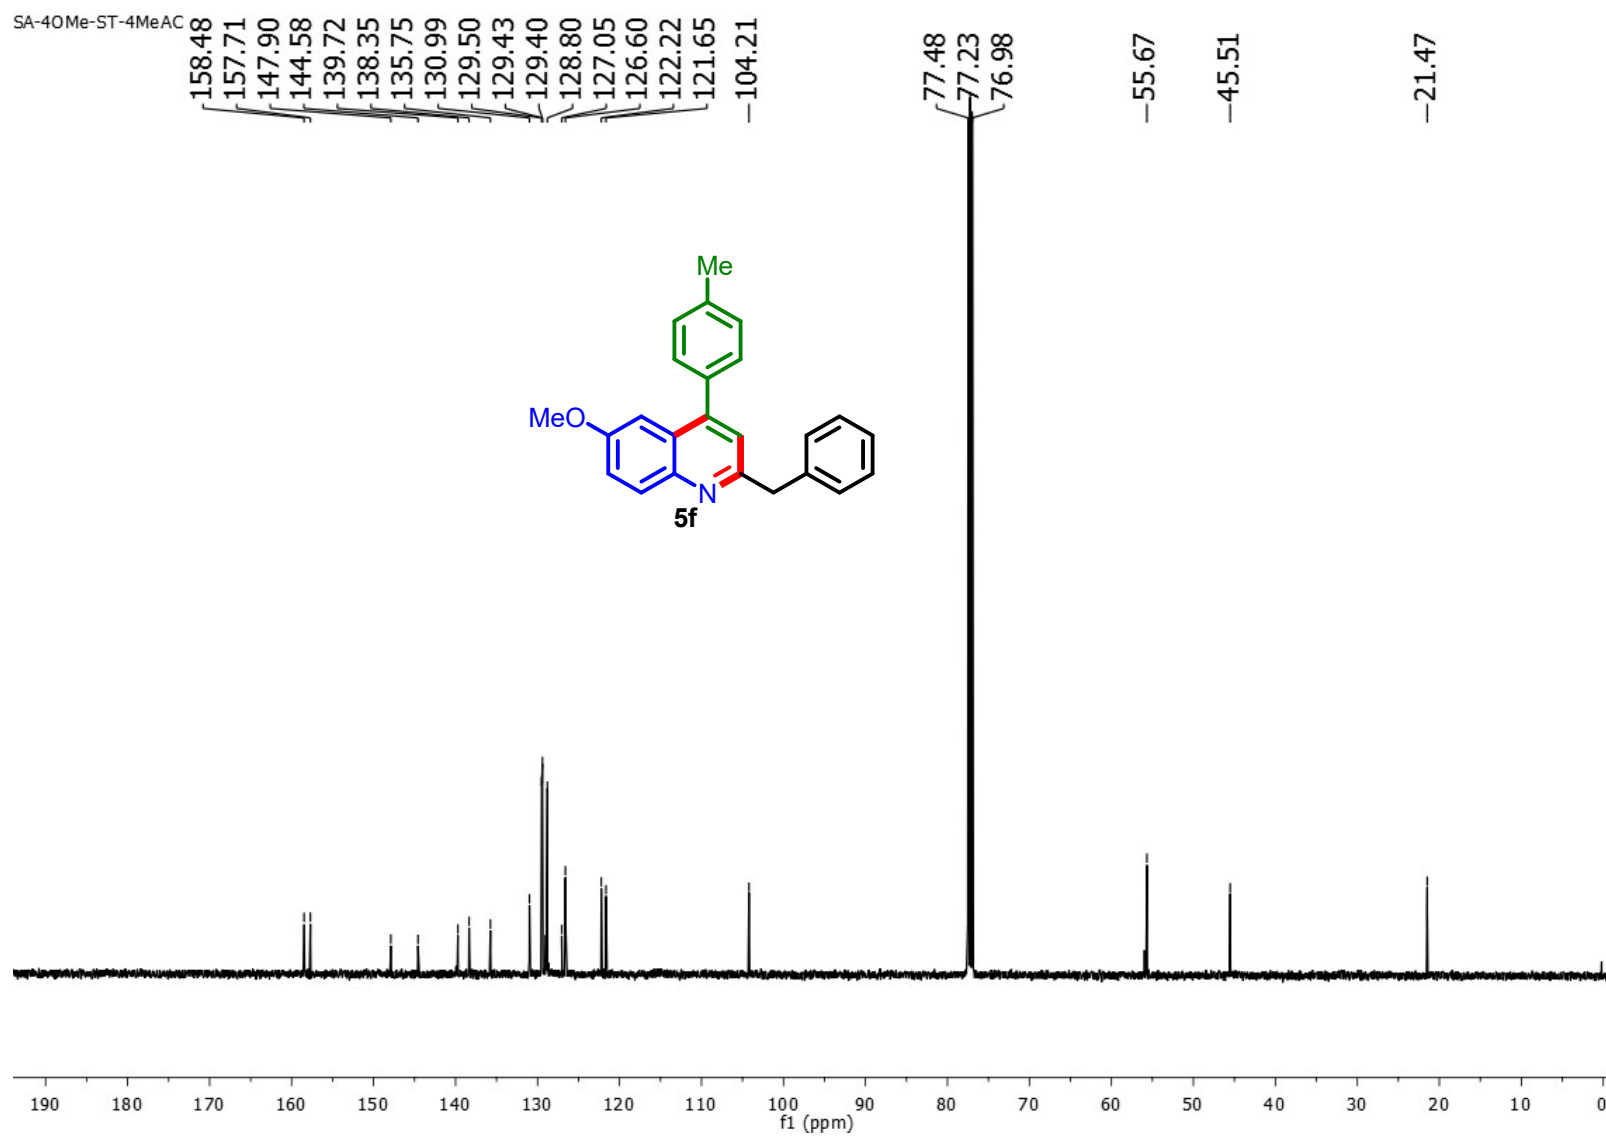

# HRMS spectrum of compound: 5f

Sample Name  
Inj Vol  
Data Filename

Position  
InjPosition  
ACQ Method

Instrument Name  
SampleType  
Comment

User Name  
IRM Calibration Status  
Acquired Time

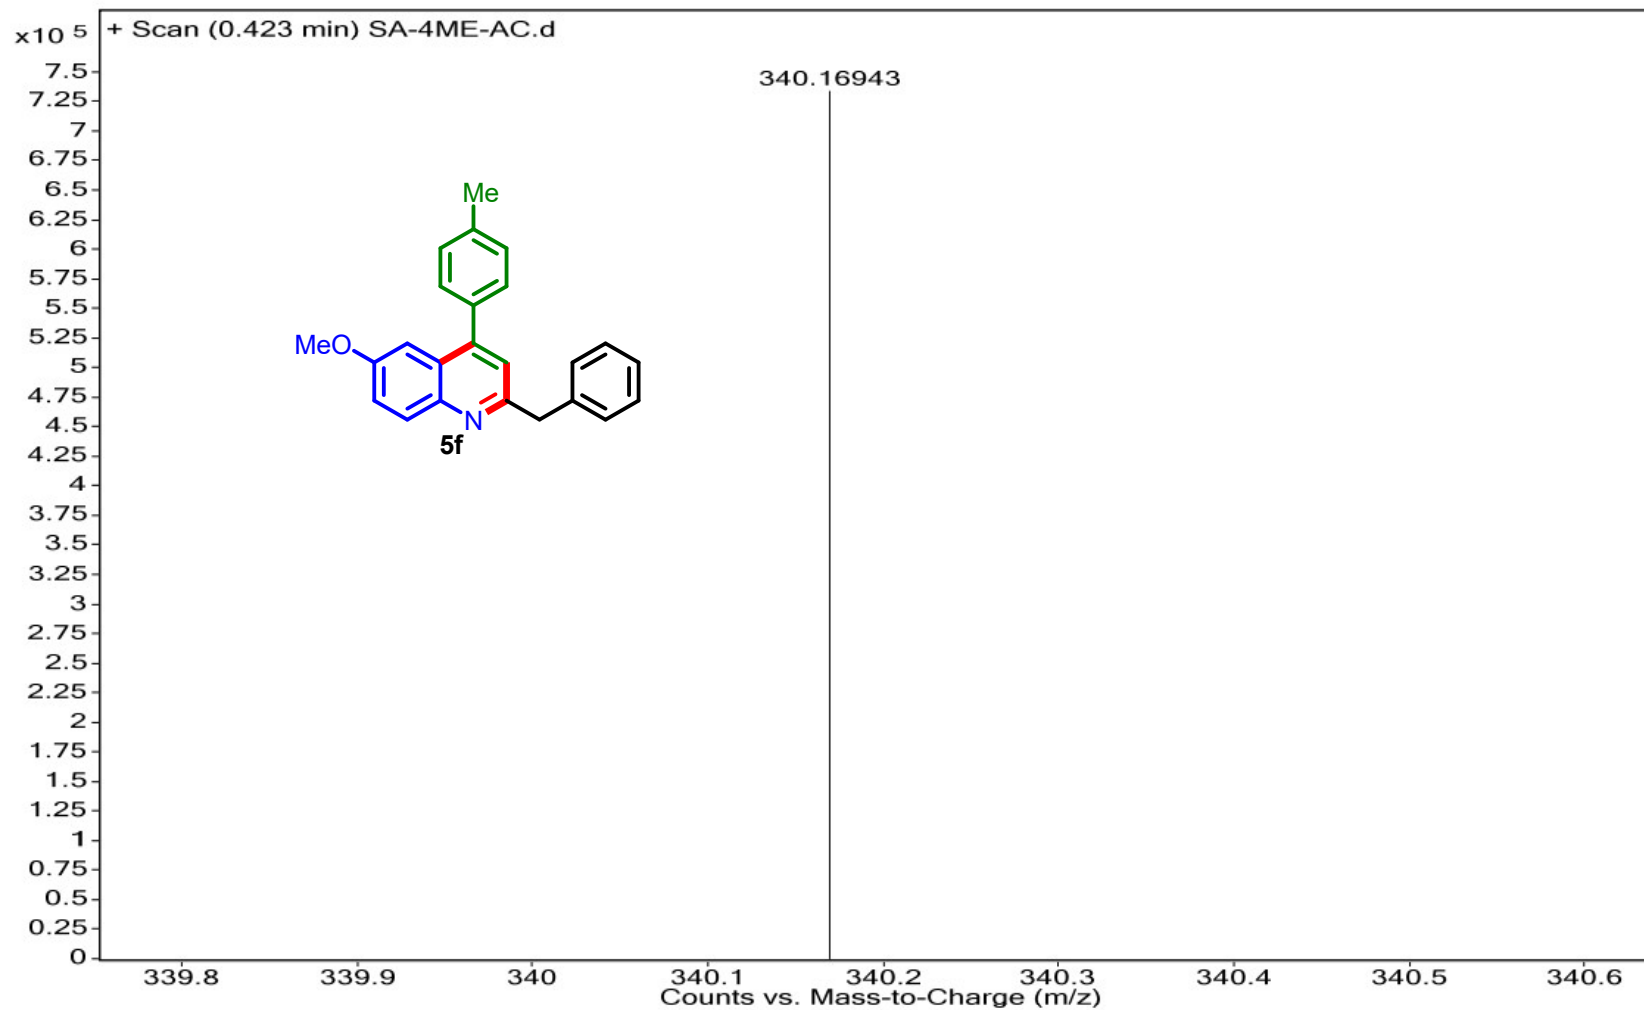

**<sup>1</sup>H NMR spectrum of compound: 5g**

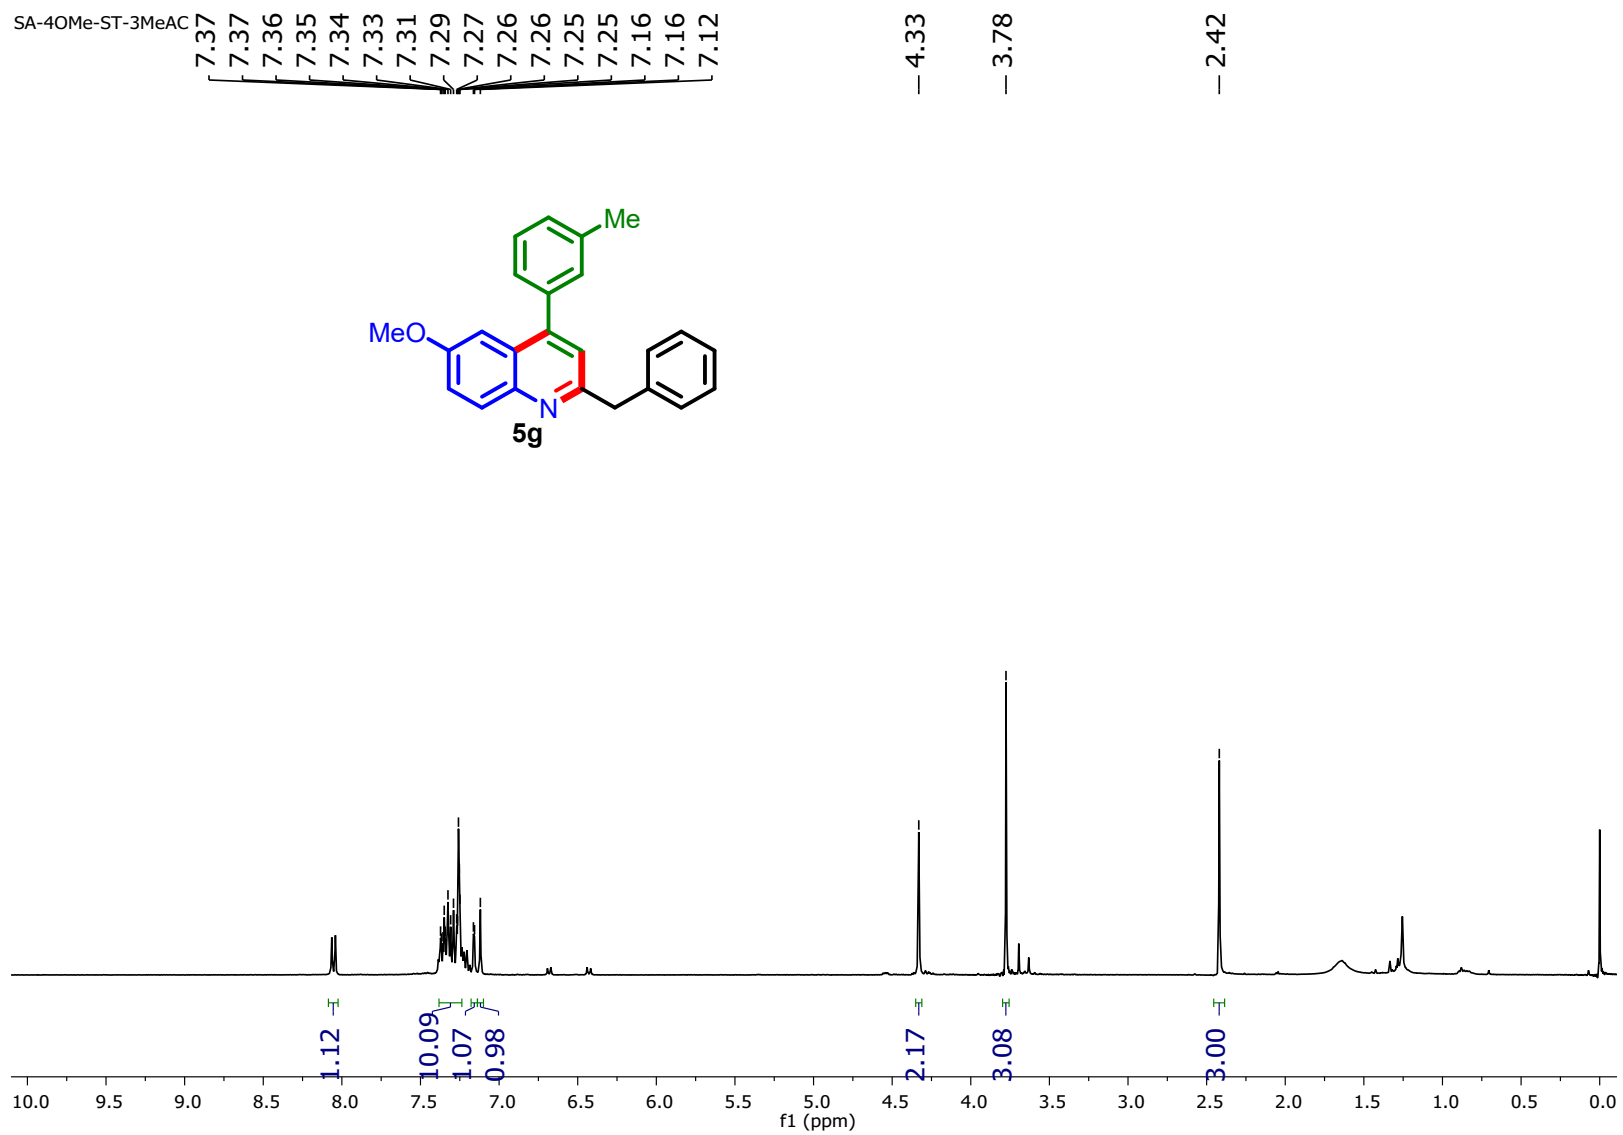

<sup>13</sup>C NMR spectrum of compound: 5g

ATK-SA-4OMe-ST-3M

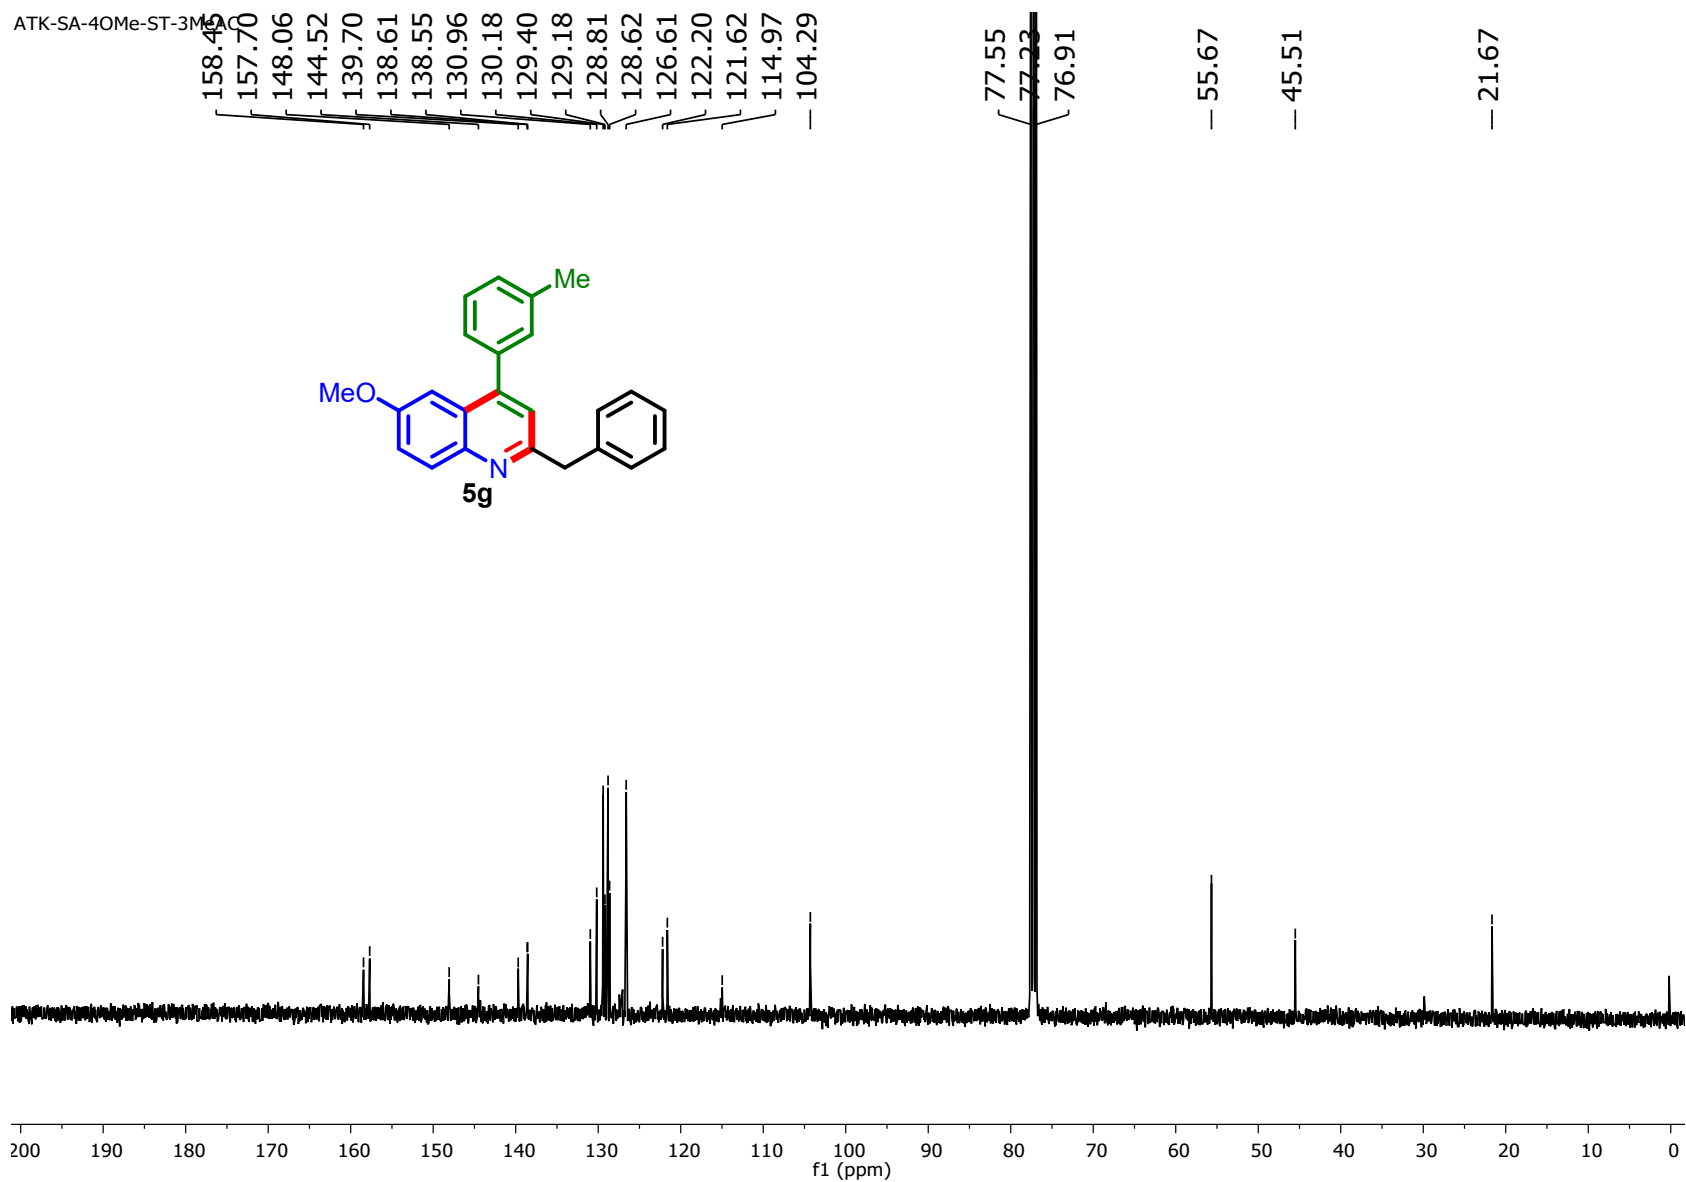

### HRMS spectrum of compound: 5g

|                      |                      |                    |                    |                        |              |                               |                      |
|----------------------|----------------------|--------------------|--------------------|------------------------|--------------|-------------------------------|----------------------|
| <b>Sample Name</b>   | WASH                 | <b>Position</b>    | P1-B2              | <b>Instrument Name</b> | Instrument 1 | <b>User Name</b>              |                      |
| <b>Inj Vol</b>       | 20                   | <b>InjPosition</b> |                    | <b>SampleType</b>      | Sample       | <b>IRM Calibration Status</b> | Success              |
| <b>Data Filename</b> | SA-4-OME-ST-3ME-AC.d | <b>ACQ Method</b>  | ESI ALS 100-1000.m | <b>Comment</b>         |              | <b>Acquired Time</b>          | 3/1/2021 12:58:28 PM |

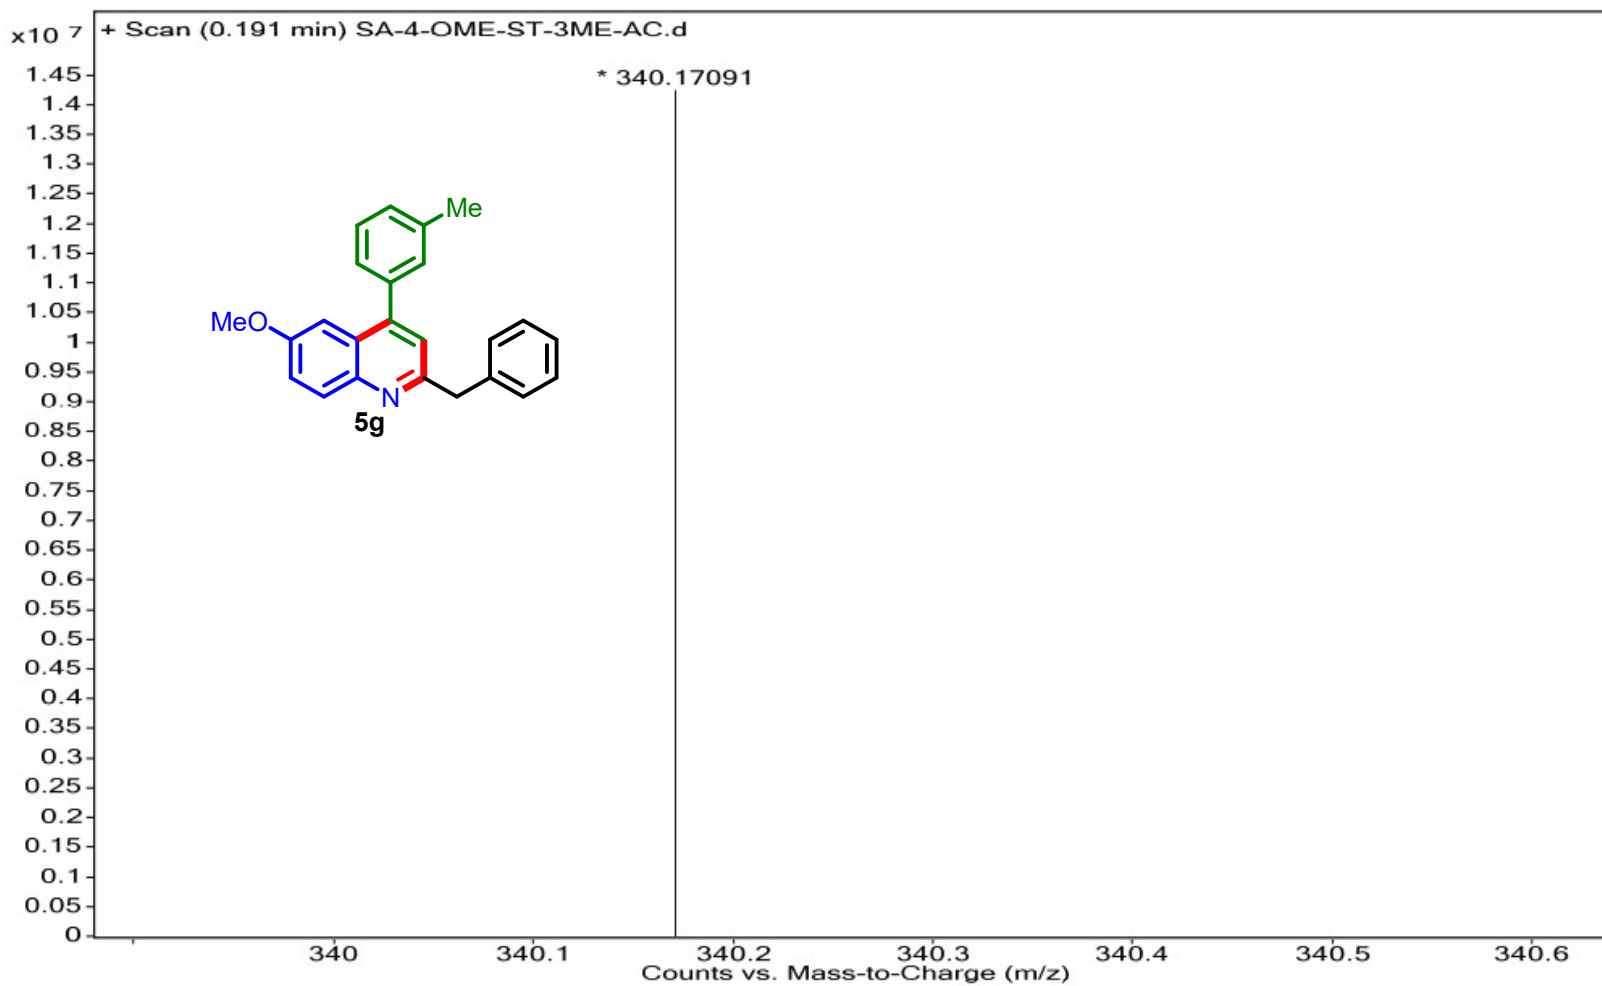

**<sup>1</sup>H NMR spectrum of compound: 5h**

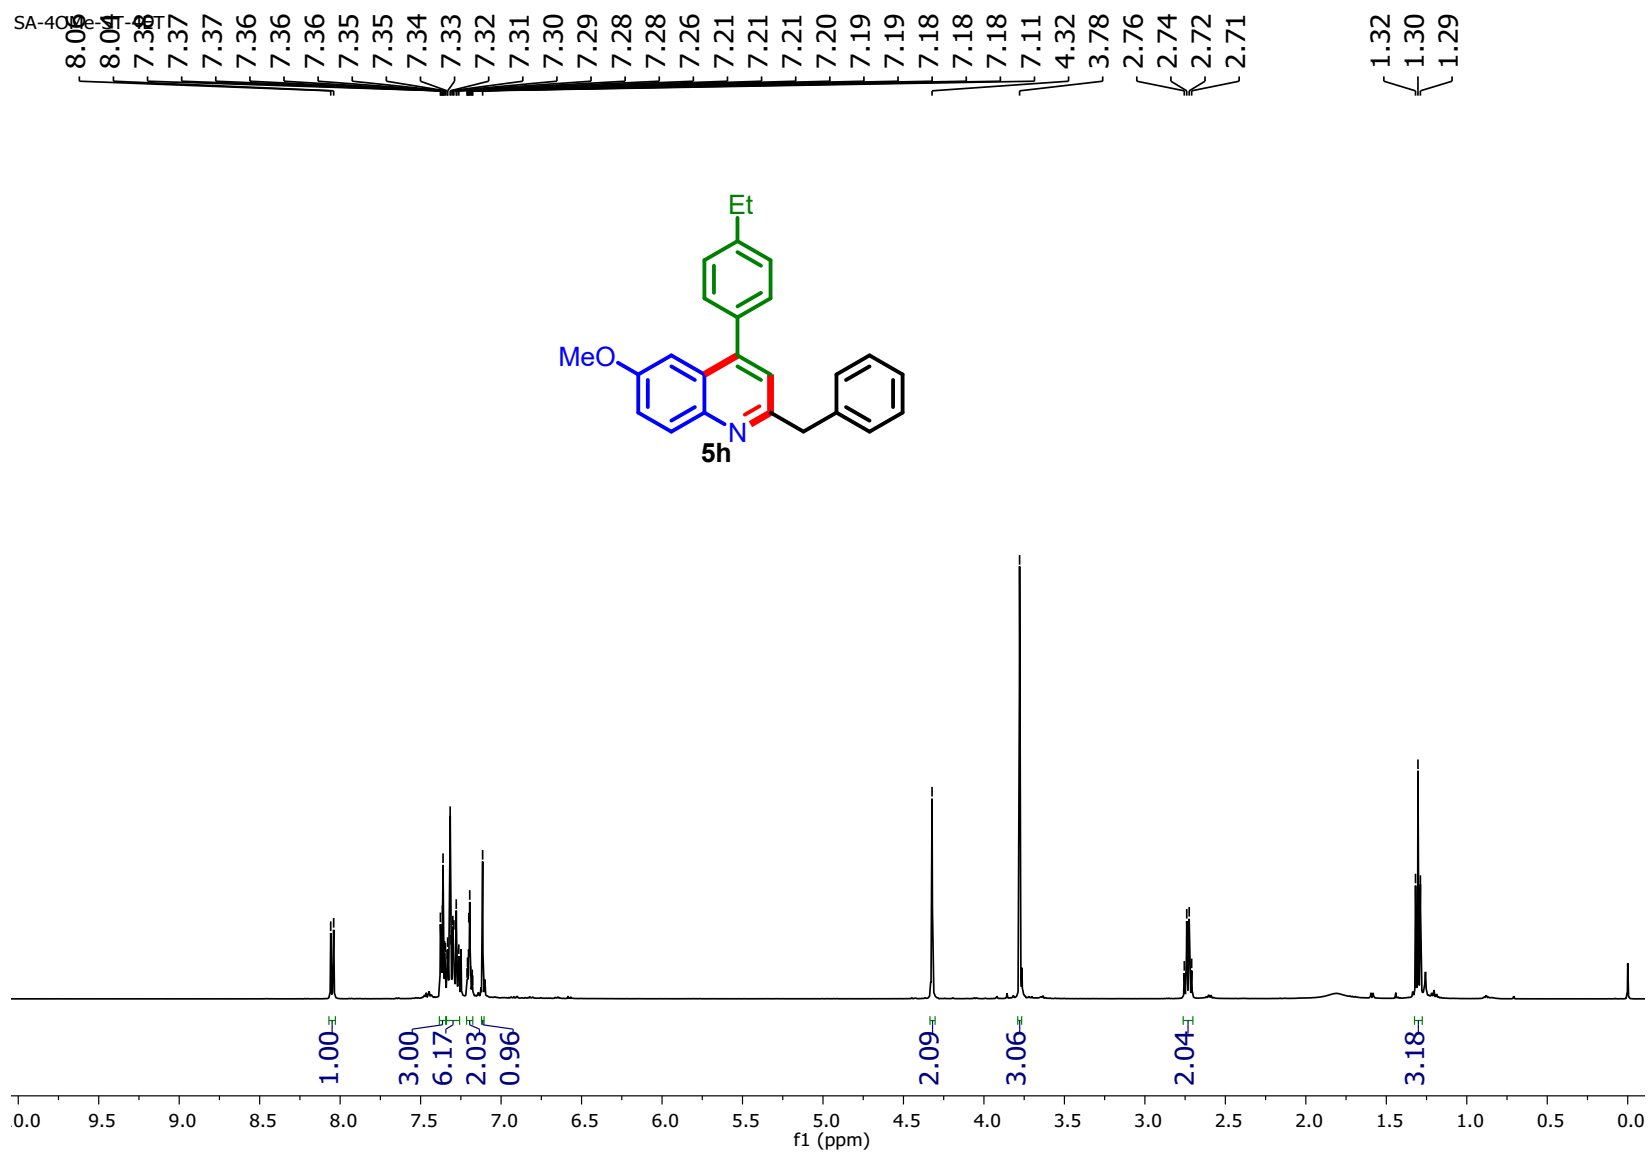

<sup>13</sup>C NMR spectrum of compound: 5h

SA-4OMe-ST-4ET

158.50  
157.70  
147.90  
144.64  
144.60  
139.73  
135.97  
131.00  
129.50  
129.41  
128.79  
128.29  
126.59  
126.54  
122.26  
121.56  
— 104.34  
  
77.48  
77.23  
76.98  
  
— 55.69  
— 45.53  
— 28.85  
— 15.63

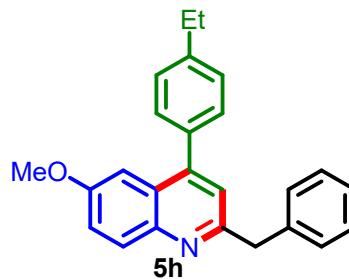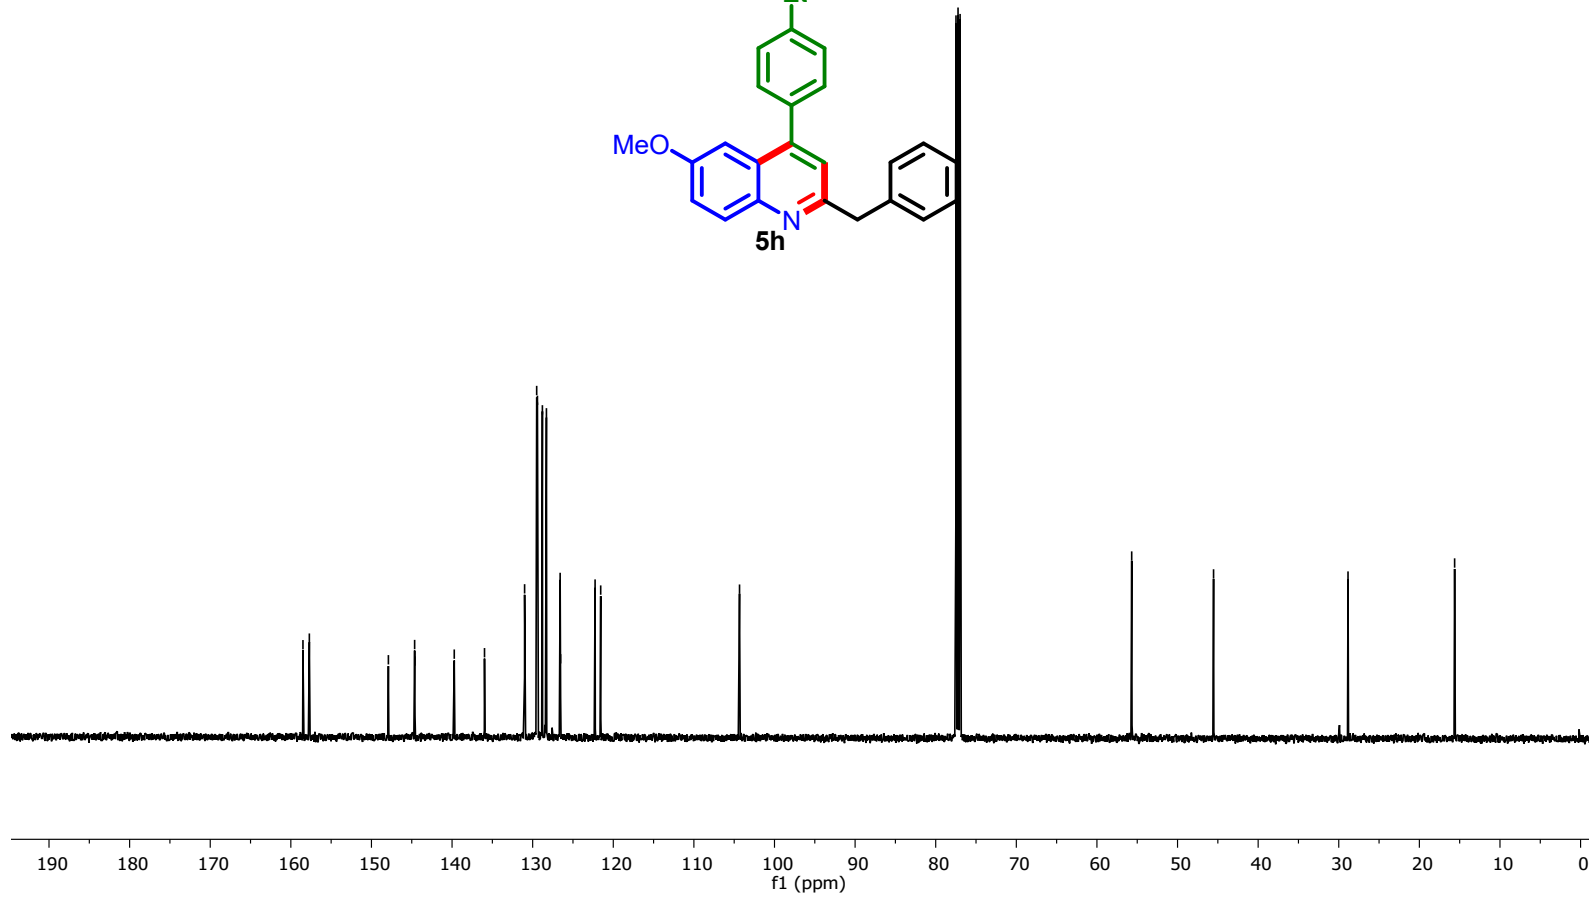

**HRMS spectrum of compound: 5h**



|                      |             |                    |                    |                        |              |                               |                      |
|----------------------|-------------|--------------------|--------------------|------------------------|--------------|-------------------------------|----------------------|
| <b>Sample Name</b>   | SA-4-ETAC   | <b>Position</b>    | P1-B8              | <b>Instrument Name</b> | Instrument 1 | <b>User Name</b>              |                      |
| <b>Inj Vol</b>       | 5           | <b>InjPosition</b> |                    | <b>SampleType</b>      | Sample       | <b>IRM Calibration Status</b> | Success              |
| <b>Data Filename</b> | SA-4-ETAC.d | <b>ACQ Method</b>  | ESI ALS 100-1000.m | <b>Comment</b>         |              | <b>Acquired Time</b>          | 7/28/2021 2:21:10 PM |

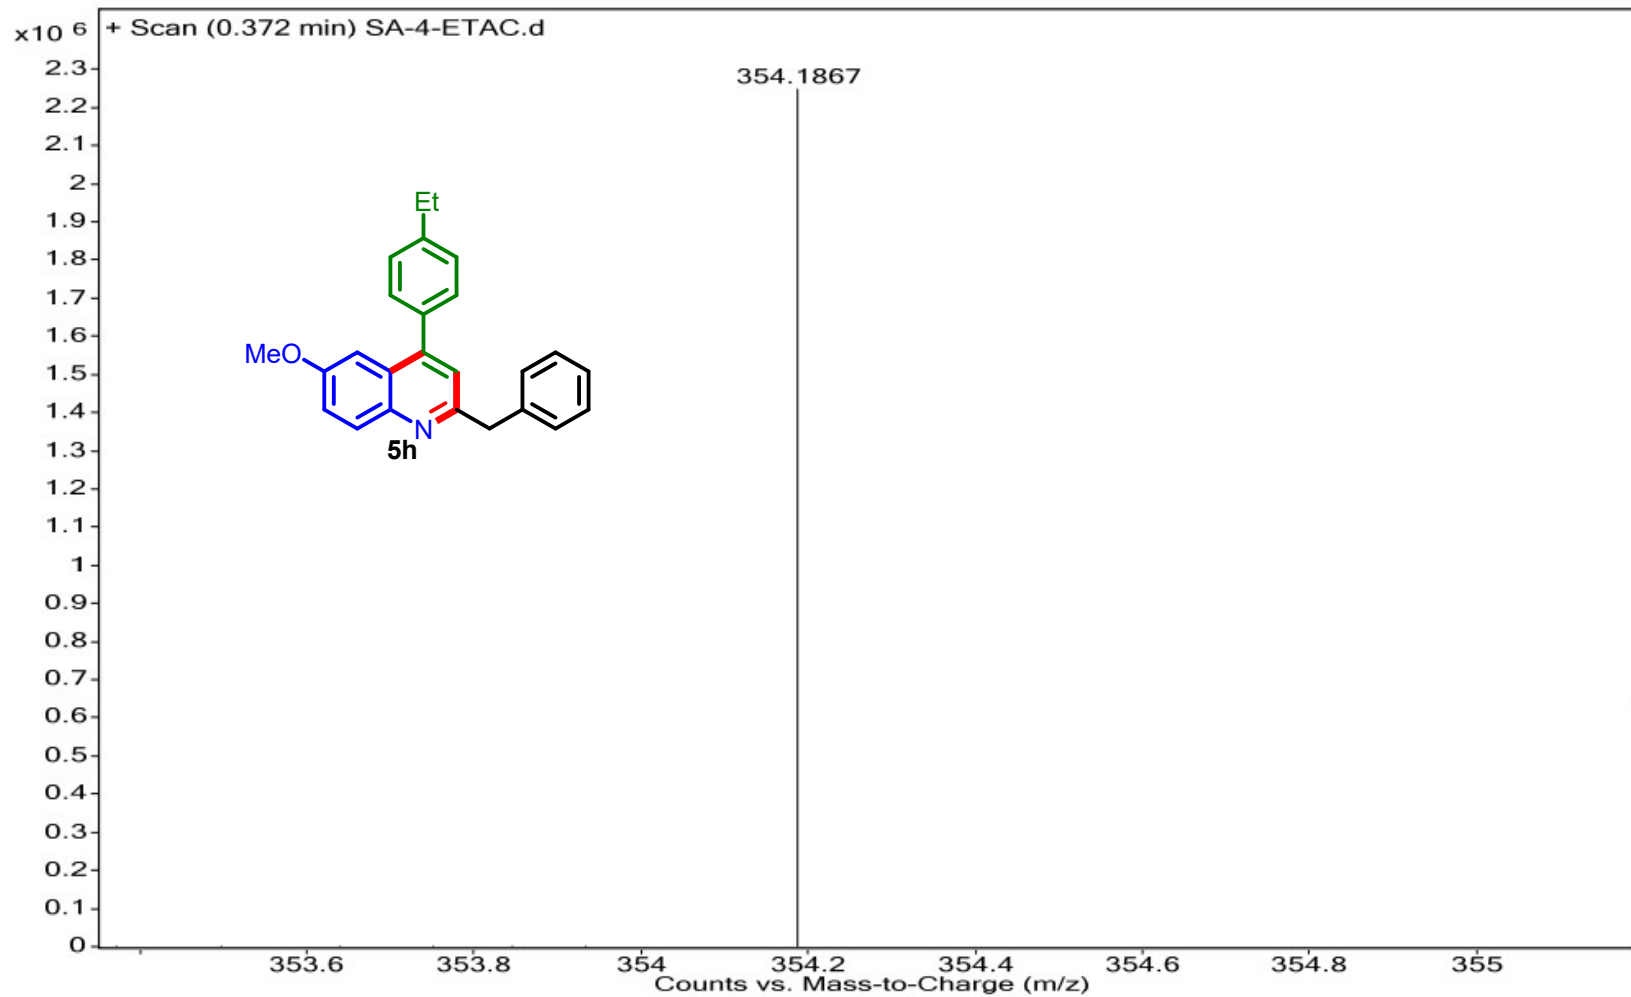

**<sup>1</sup>H NMR spectrum of compound: 5i**

SA-4OMe-ST-4TB-AC

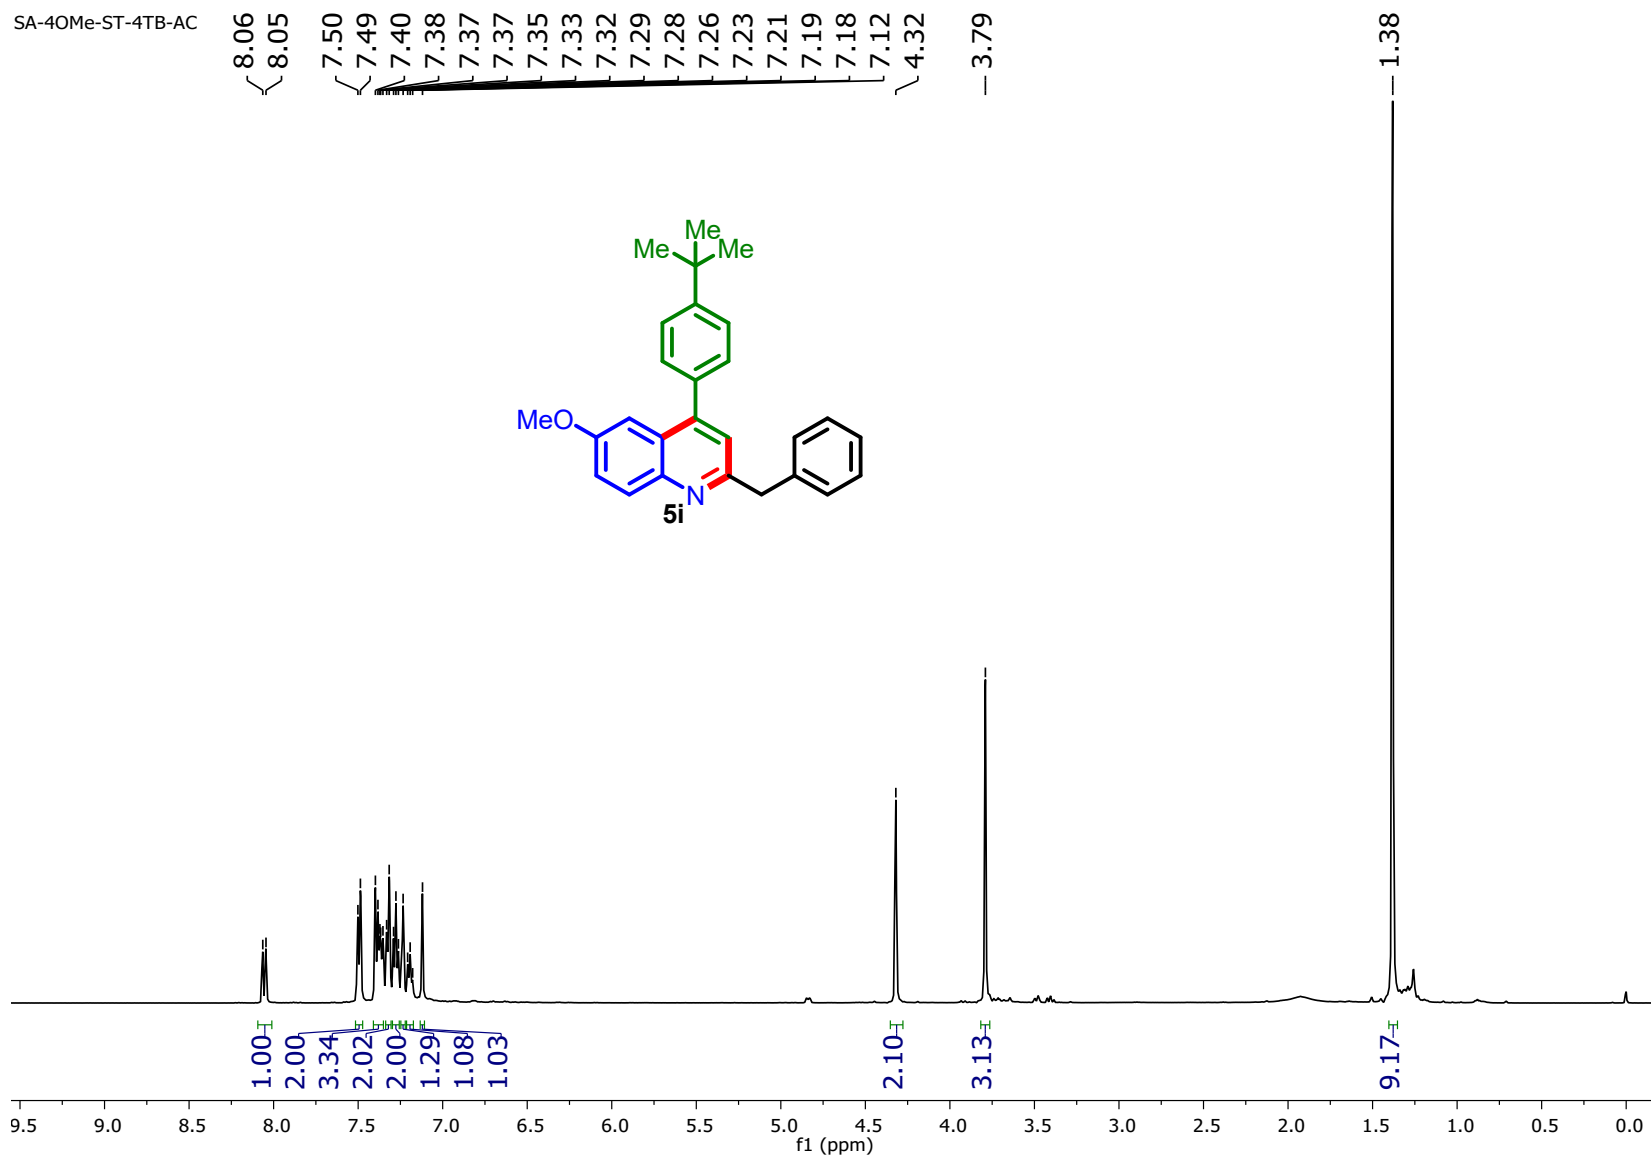

<sup>13</sup>C NMR spectrum of compound: 5i

SA-4OMe-ST-4TB-AC

158.51  
157.70  
151.57  
147.82  
144.59  
139.72  
135.70  
131.00  
129.41  
129.25  
128.79  
126.59  
126.51  
125.73  
122.31  
121.42  
— 104.56

77.48  
77.23  
76.97

— 55.74

— 45.53

~ 34.92  
~ 31.57

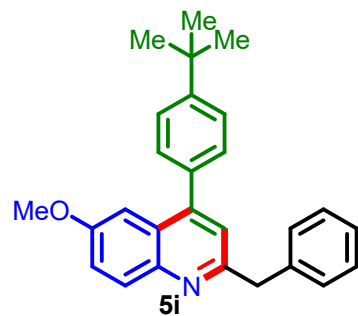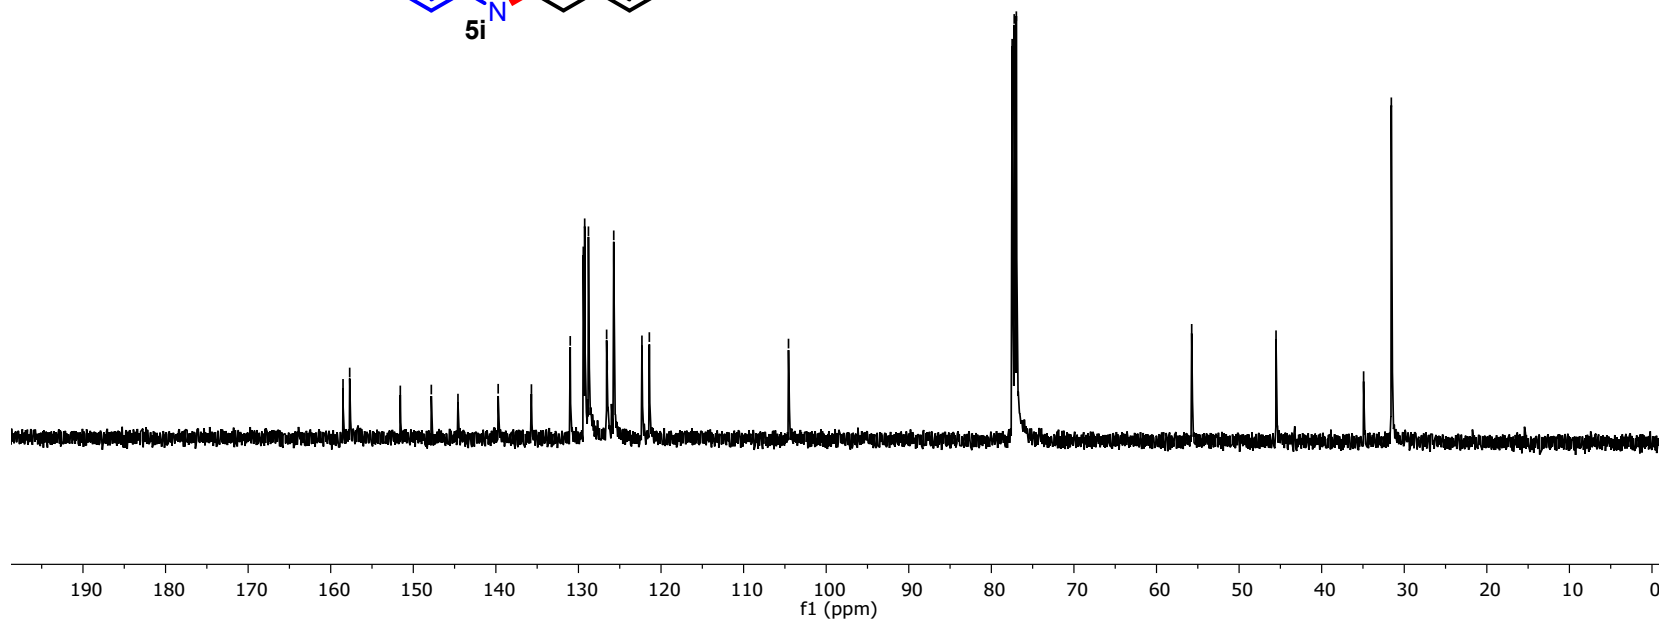

# HRMS spectrum of compound: 5i

Sample Name  
Inj Vol  
Data Filename

Position  
InjPosition  
ACQ Method

Instrument Name  
SampleType  
Comment

User Name  
IRM Calibration Status  
Acquired Time

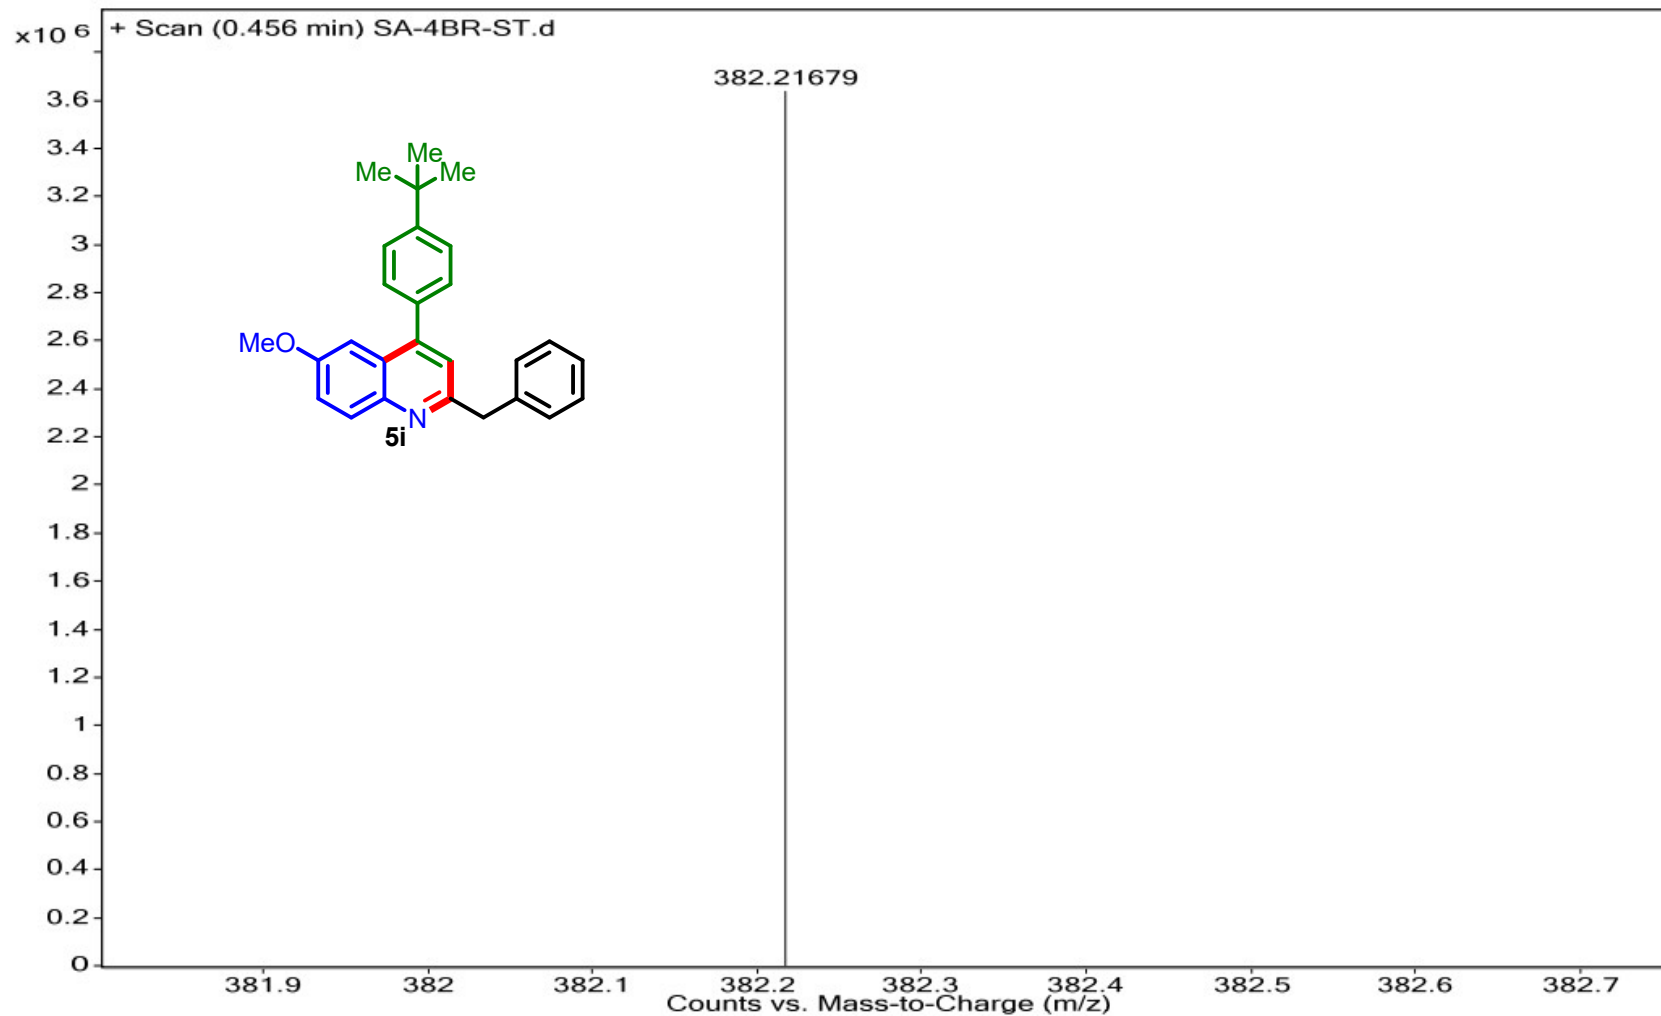

**<sup>1</sup>H NMR spectrum of compound: 5j**

SA-40Me-ST-3TF-AC

8.06  
8.05  
7.39  
7.38  
7.38  
7.37  
7.37  
7.36  
7.35  
7.34  
7.33  
7.33  
7.31  
7.31  
7.30  
7.30  
7.29  
7.29  
7.29  
7.28  
7.28  
7.18  
4.33  
3.83

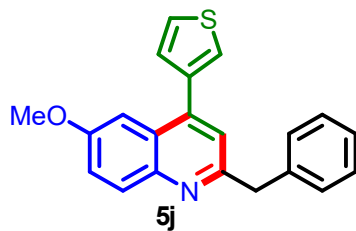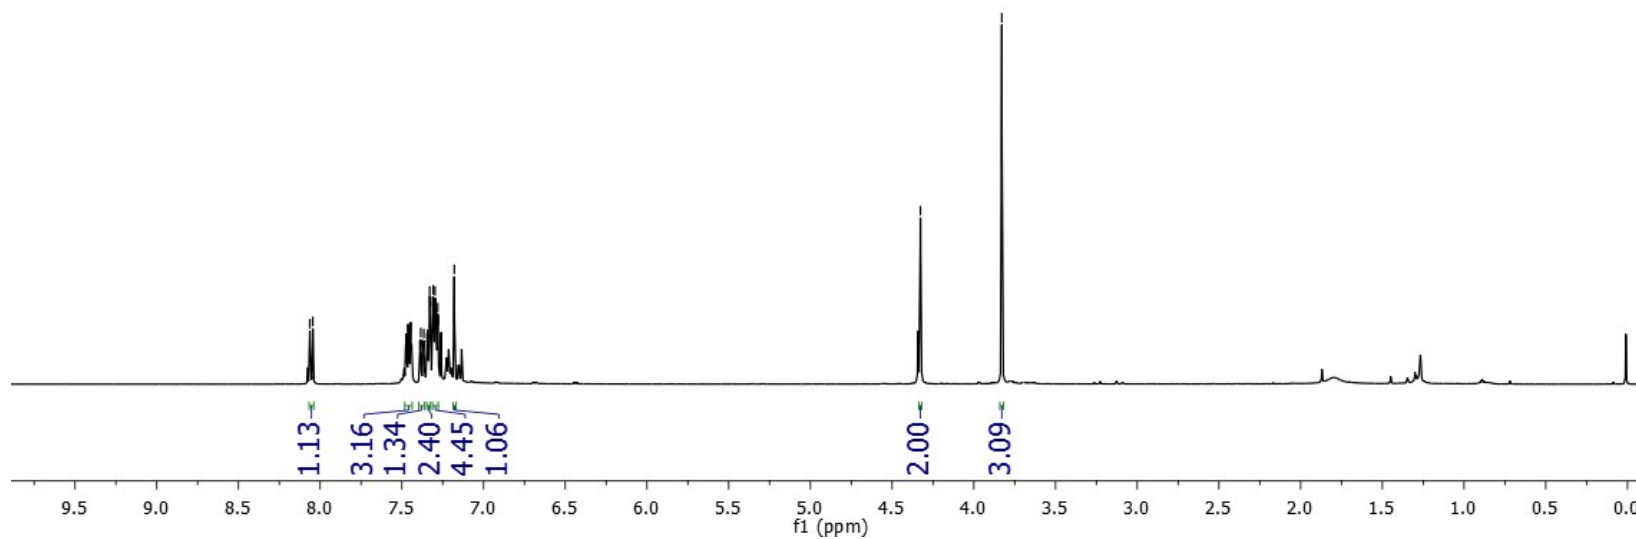

**<sup>13</sup>C NMR spectrum of compound: 5j**

SA-4OMe-ST-3TF-AC

158.52  
157.90  
144.65  
142.60  
139.68  
139.19  
131.09  
129.53  
129.40  
128.82  
128.78  
126.64  
126.40  
124.70  
122.03  
121.71  
— 104.06

77.48  
77.23  
76.98

— 55.70

— 45.47

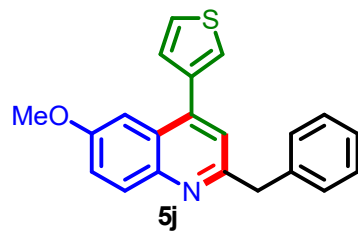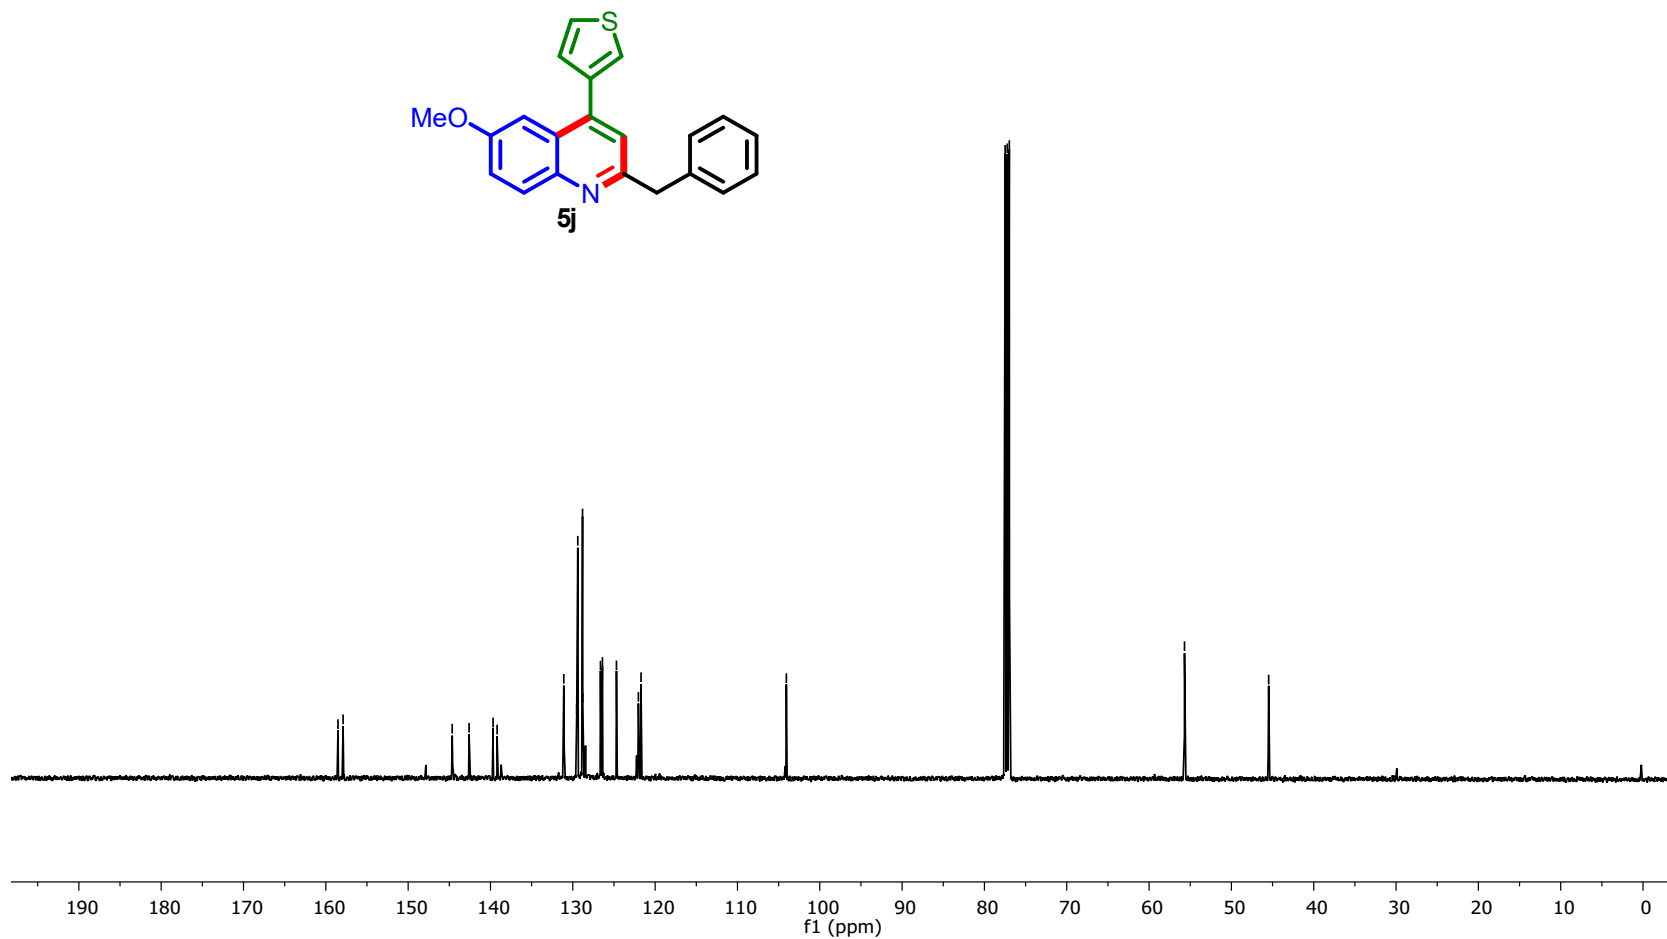

# HRMS spectrum of compound: 5j

Sample Name  
Inj Vol  
Data Filename

Position  
InjPosition  
ACQ Method

Instrument Name  
SampleType  
Comment

User Name  
IRM Calibration Status  
Acquired Time

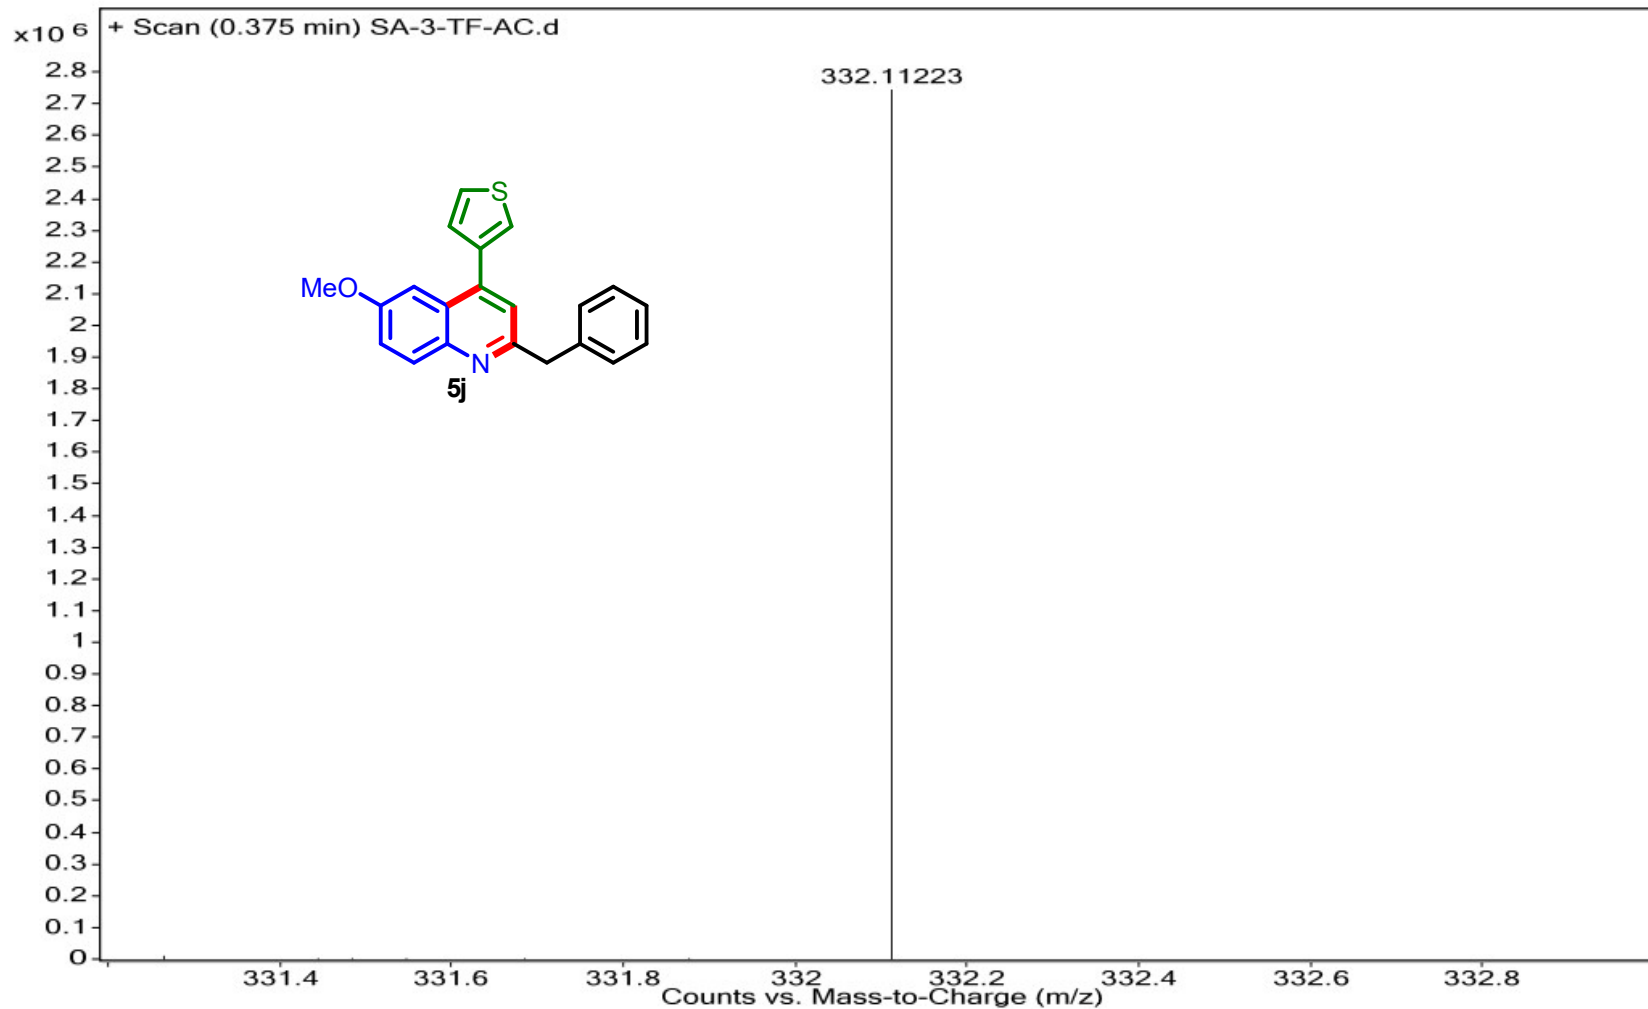

**<sup>1</sup>H NMR spectrum of compound: 5k**

SA-4OMe-ST-2PyAC

8.07  
8.05  
7.47  
7.47  
7.46  
7.45  
7.45  
7.45  
7.44  
7.38  
7.37  
7.37  
7.34  
7.33  
7.31  
7.29  
7.27  
7.22  
7.21  
7.19  
7.15  
7.14  
7.13  
4.34  
3.77

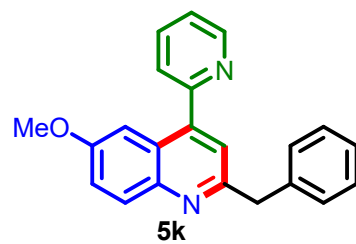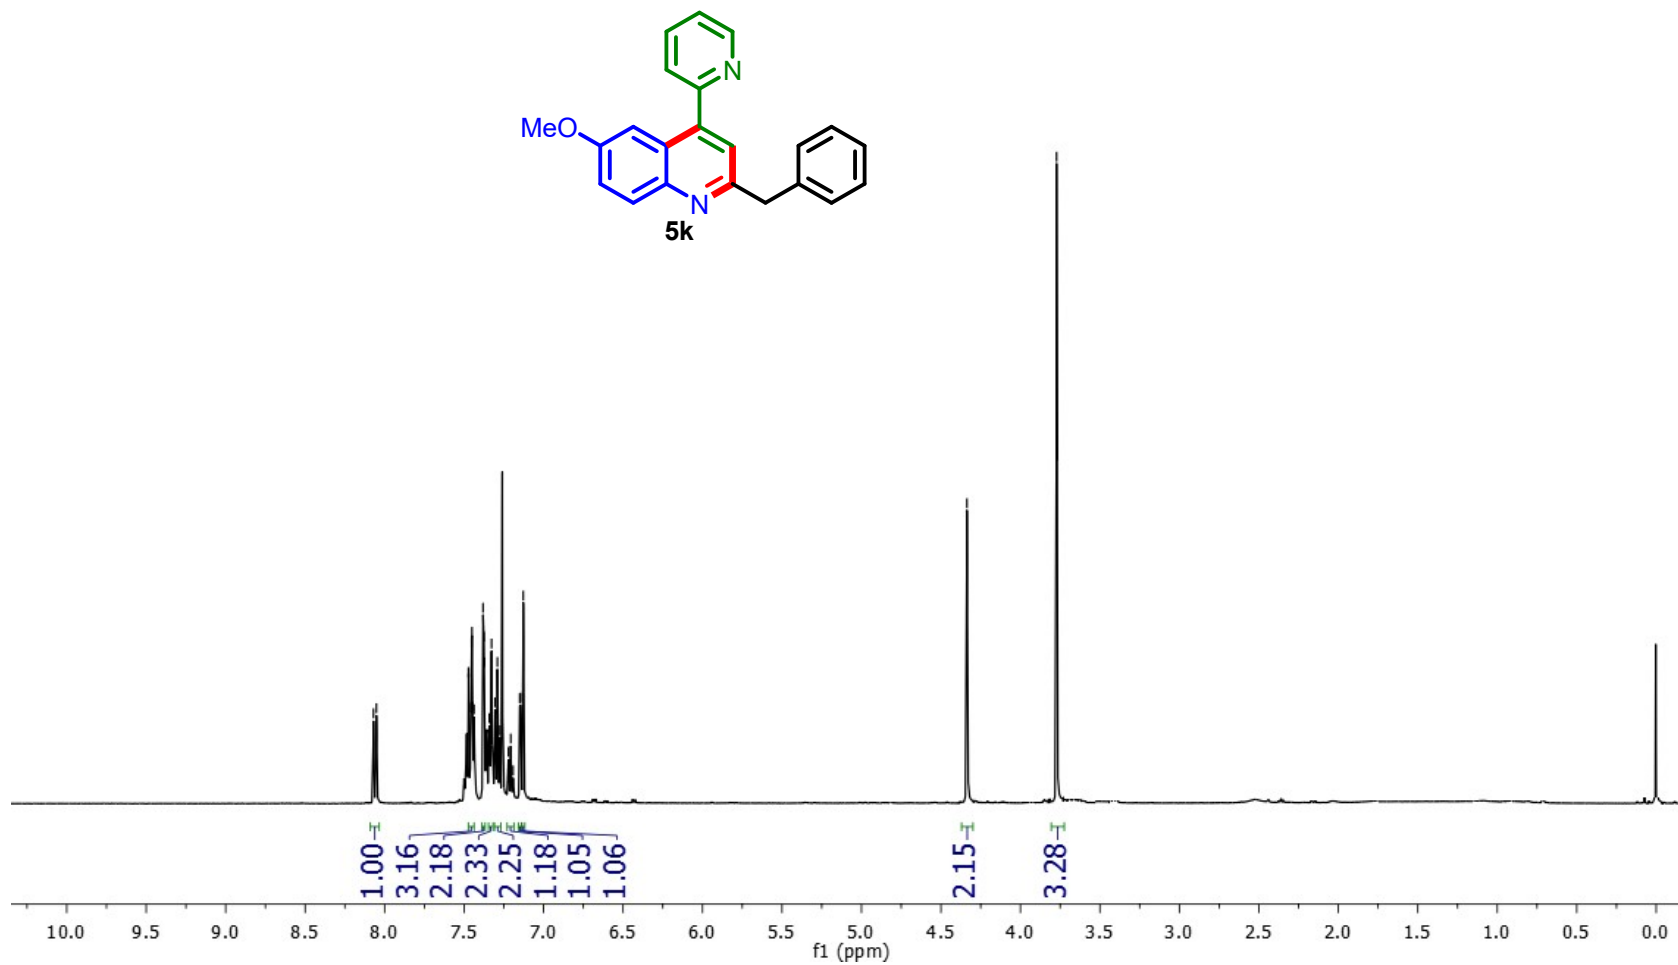



<sup>13</sup>C NMR spectrum of compound: 5k

SA-4OMe-ST-2Py

158.49  
157.80  
147.89  
144.57  
141.40  
139.69  
138.71  
131.03  
129.54  
129.41  
128.82  
128.80  
128.47  
126.63  
125.98  
122.26  
121.69  
104.19

77.48  
77.23  
76.98

55.67

45.51

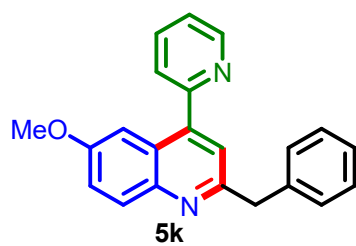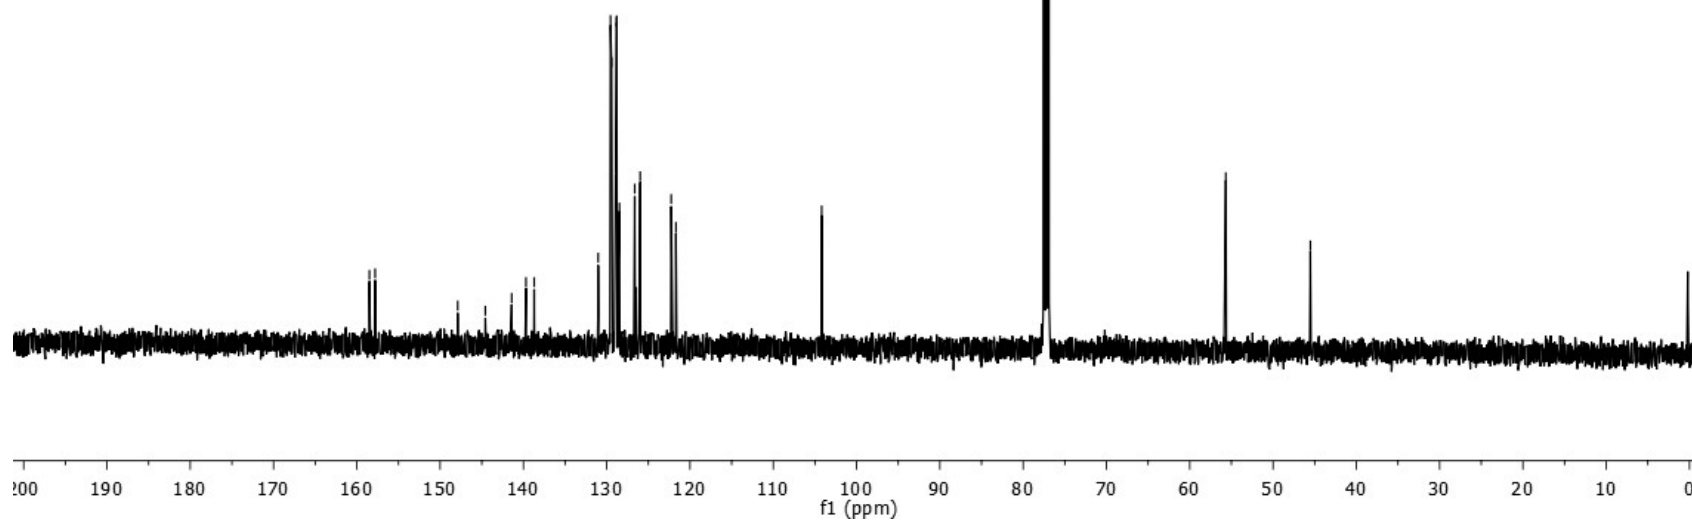

## HRMS spectrum of compound: 5k

|             |                   |                        |         |                 |                                 |
|-------------|-------------------|------------------------|---------|-----------------|---------------------------------|
| Sample Name | SAMPLE            | Position               | P1-F4   | Instrument Name | Instrument 1                    |
| User Name   |                   | Inj Vol                | 20      | InjPosition     |                                 |
| Sample Type | Sample            | IRM Calibration Status | Success | Data Filename   | SA-2-PY-SE.d                    |
| ACQ Method  | ESI ALS 100-500.m | Comment                |         | Acquired Time   | 29-07-2021 15:59:37 (UTC+05:30) |

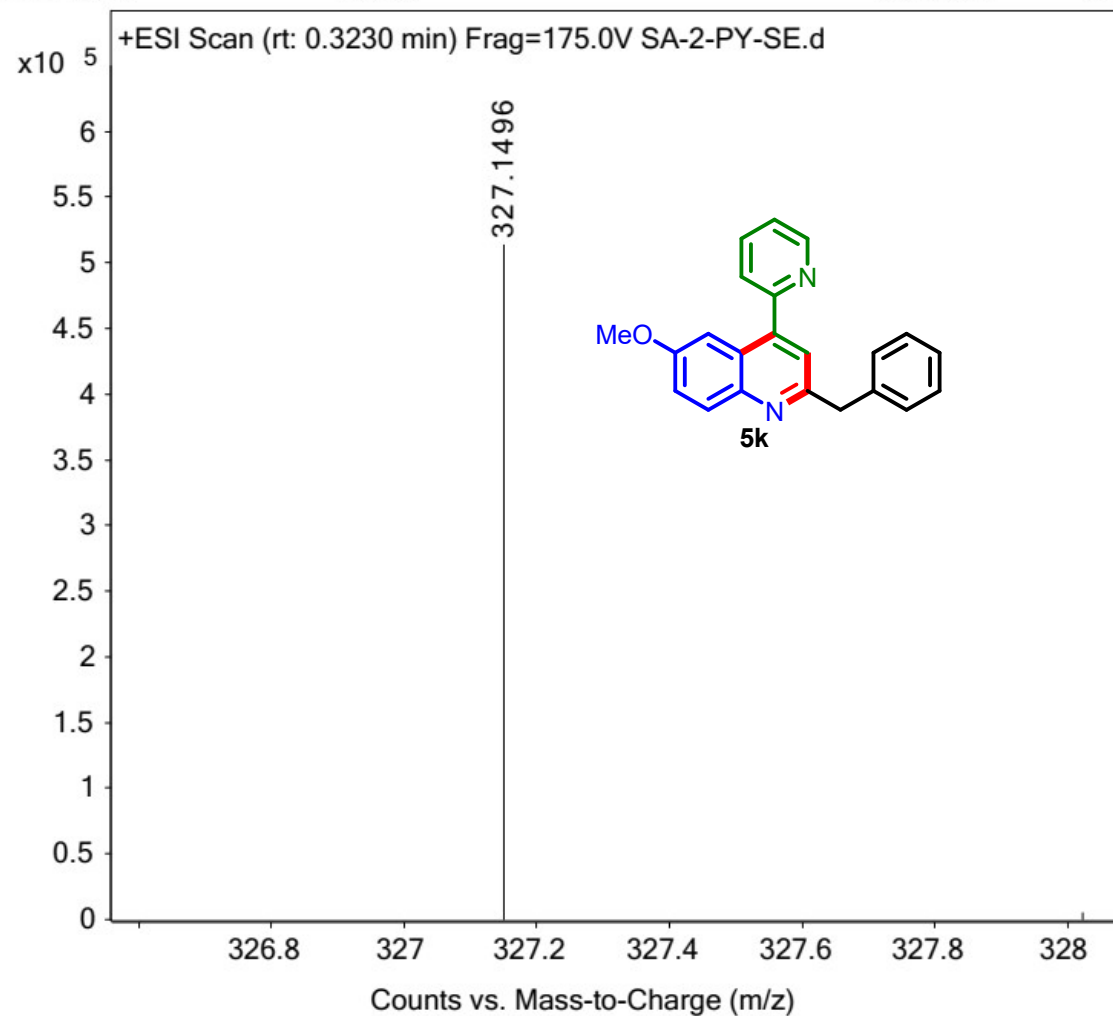

**<sup>1</sup>H NMR spectrum of compound: 5I**

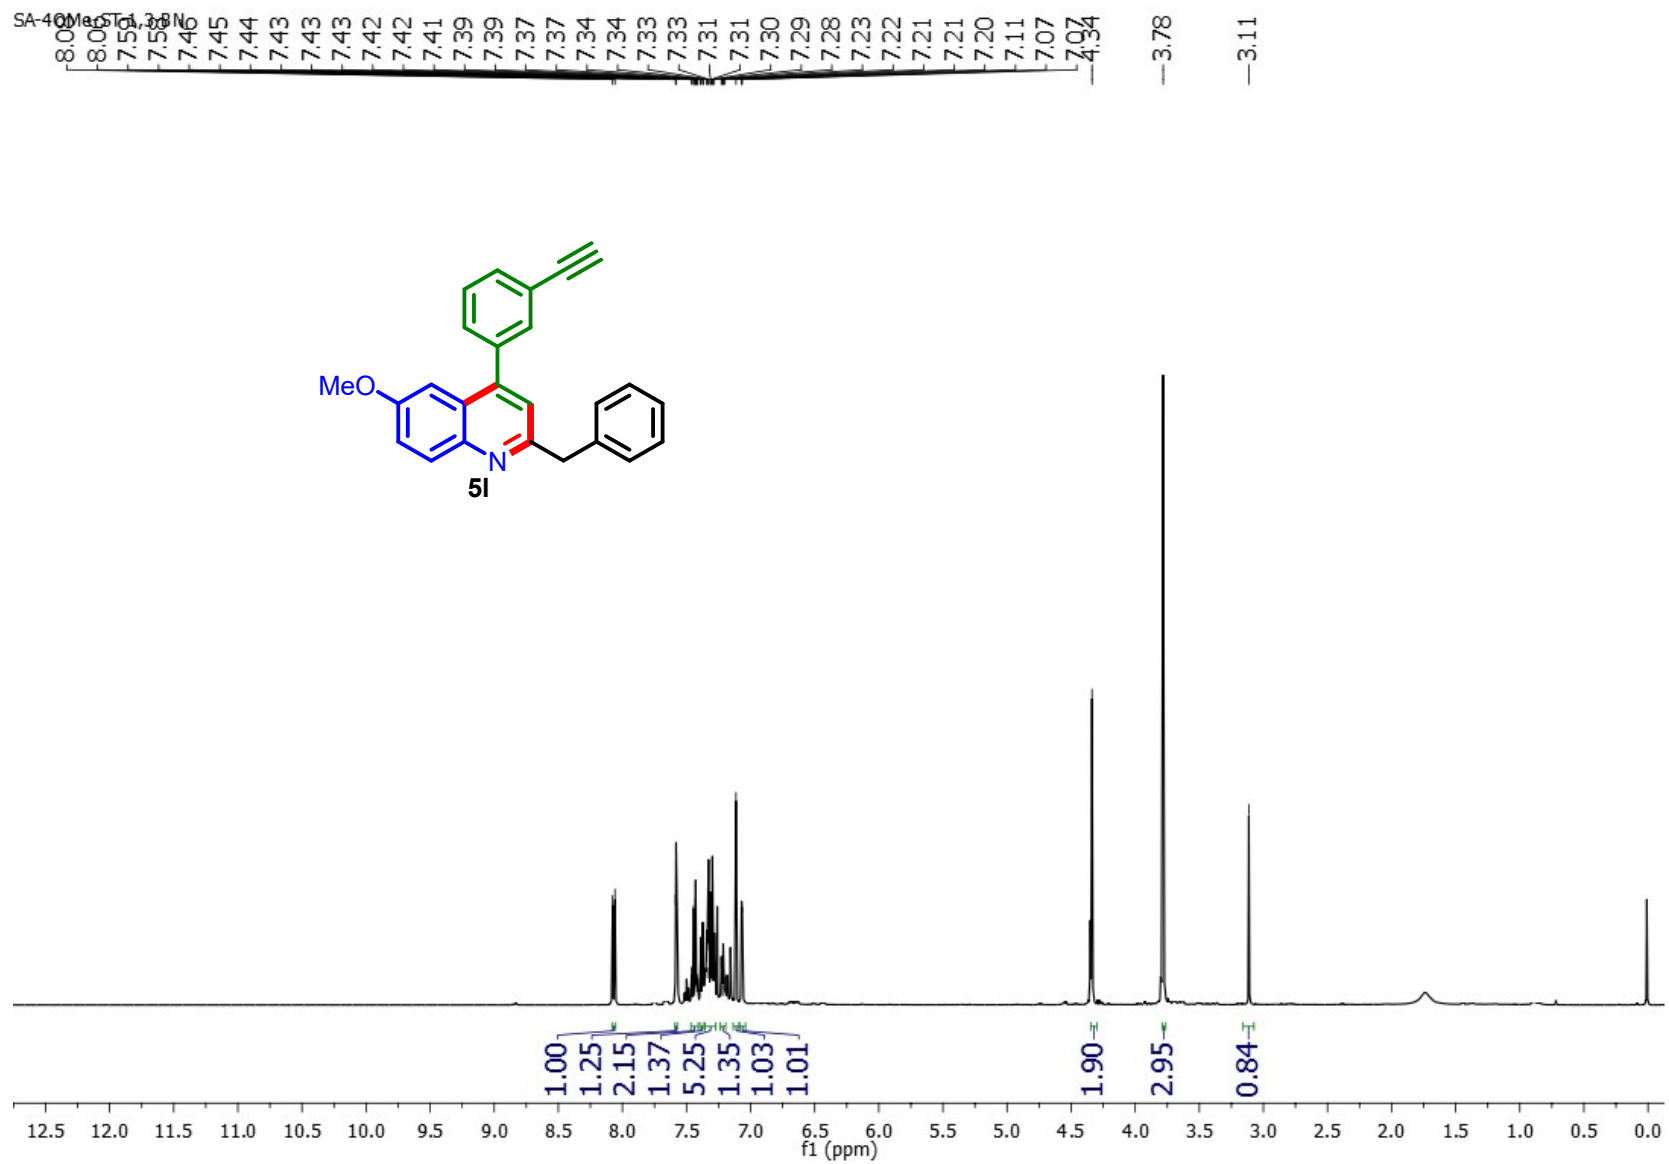

<sup>13</sup>C NMR spectrum of compound: 5l

SA-4OMe-ST-1,3-BN

158.42  
157.79  
146.71  
144.40  
139.50  
138.80  
132.98  
132.10  
131.00  
129.92  
129.34  
128.84  
128.81  
126.67  
122.18  
121.86  
-103.69  
83.23  
78.17  
77.44  
77.23  
77.02  
-55.67  
-45.44

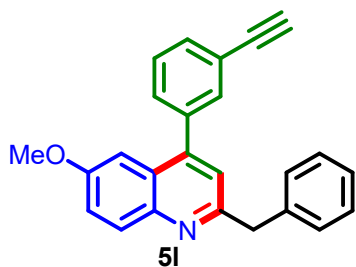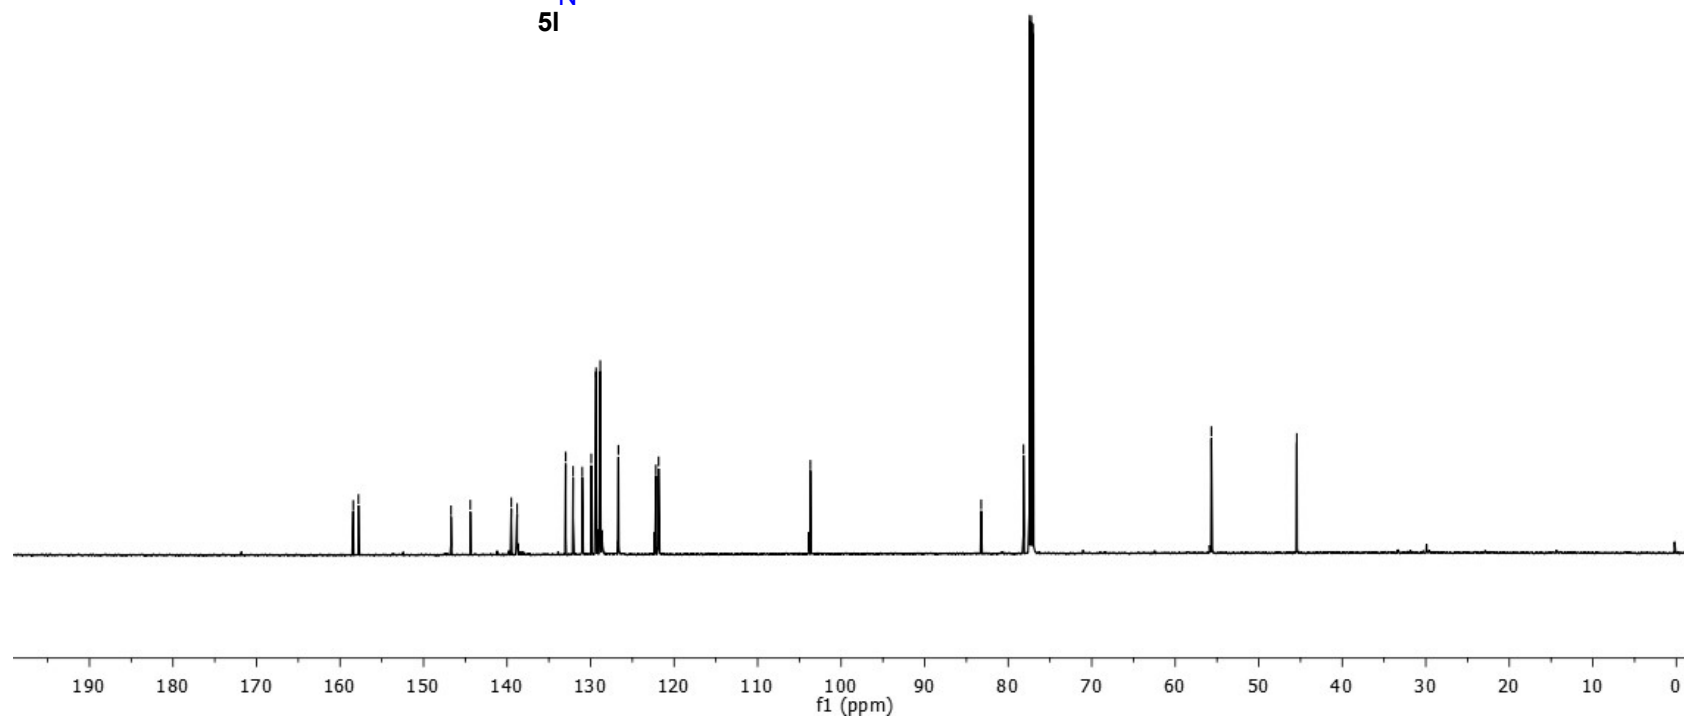

# HRMS spectrum of compound: 5l

Sample Name  
Inj Vol  
Data Filename

Position  
InjPosition  
ACQ Method

Instrument Name  
SampleType  
Comment

User Name  
IRM Calibration Status  
Acquired Time

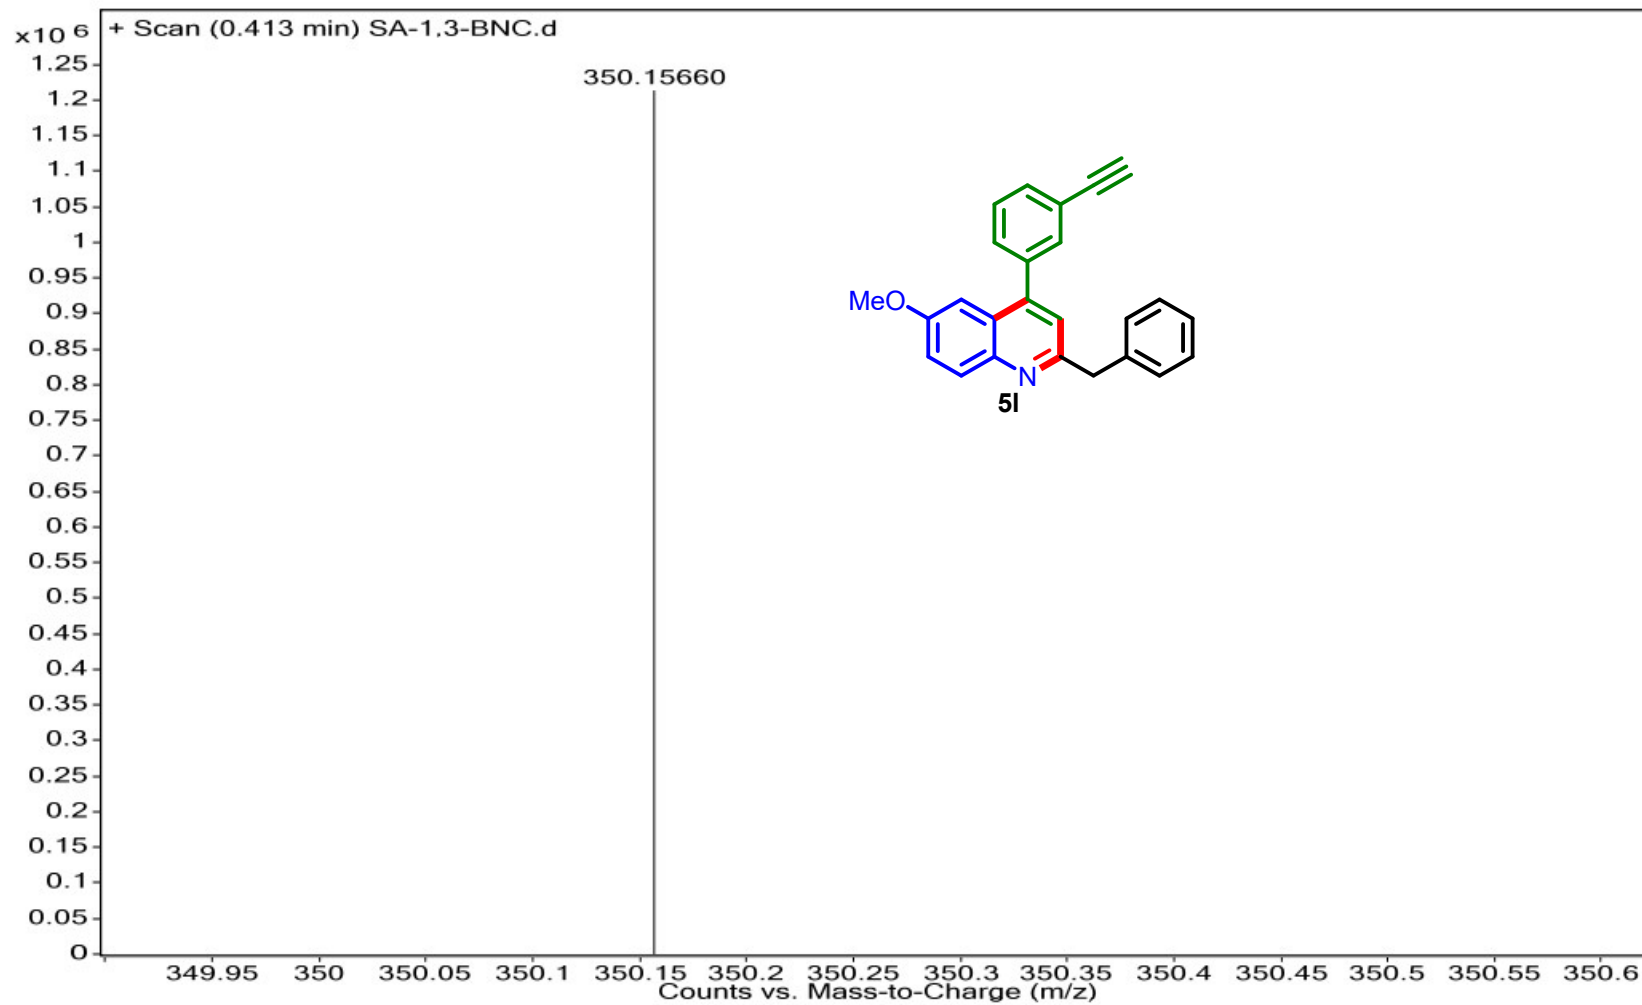

<sup>1</sup>H NMR spectrum of compound: 5m

SA-4OMe-ST-4FAC

8.07  
8.05  
7.42  
7.41  
7.39  
7.38  
7.36  
7.33  
7.32  
7.30  
7.28  
7.27  
7.21  
7.20  
7.18  
7.17  
7.15  
7.13  
7.09  
7.07  
4.32  
3.77

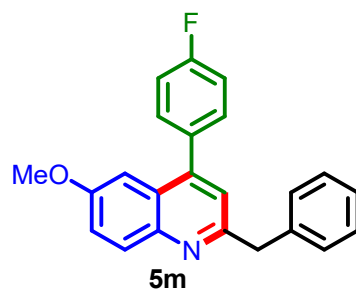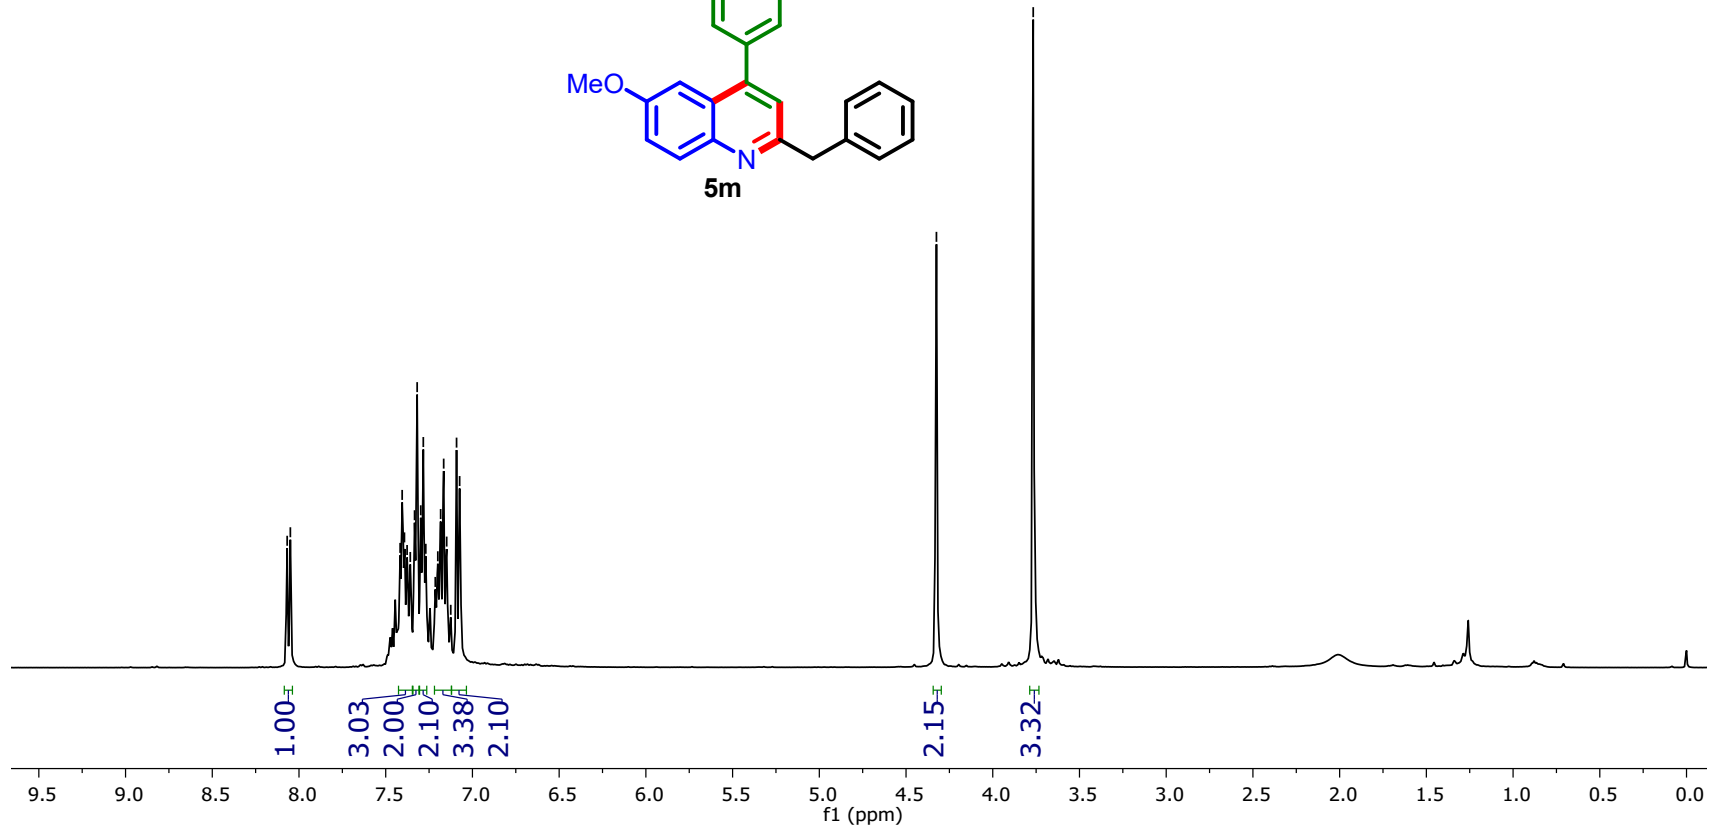

**<sup>13</sup>C NMR spectrum of compound: 5m**

SA-4OMe-ST-4F-AC

- 163.97
- 162.00
- 158.45
- 157.88
- 146.76
- 144.56
- 139.61
- 131.23
- 131.17
- 131.12
- 129.51
- 129.37
- 128.81
- 126.64
- 126.43
- 122.25
- 121.73
- 115.91
- 115.74
- 103.91
- 77.48
- 77.23
- 76.98
- 55.63
- 45.47

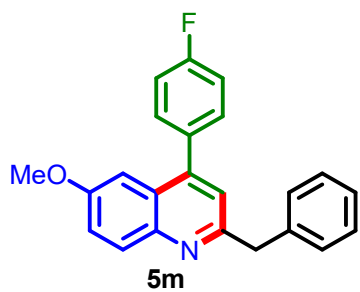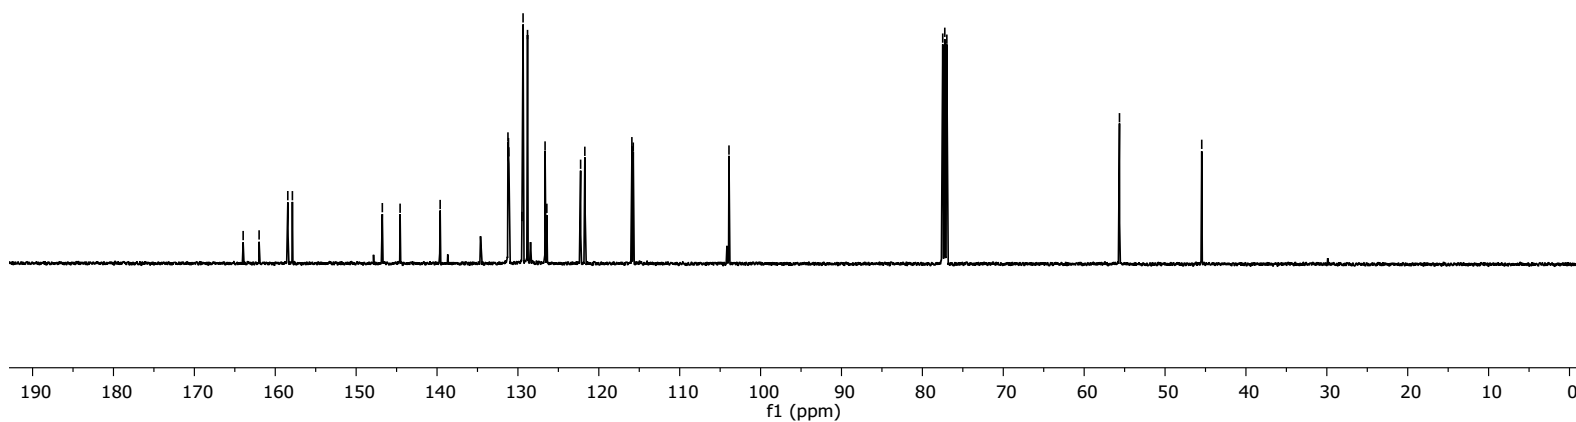

# HRMS spectrum of compound: 5m

Sample Name  
Inj Vol  
Data Filename

Position  
InjPosition  
ACQ Method

Instrument Name  
SampleType  
Comment

User Name  
IRM Calibration Status  
Acquired Time

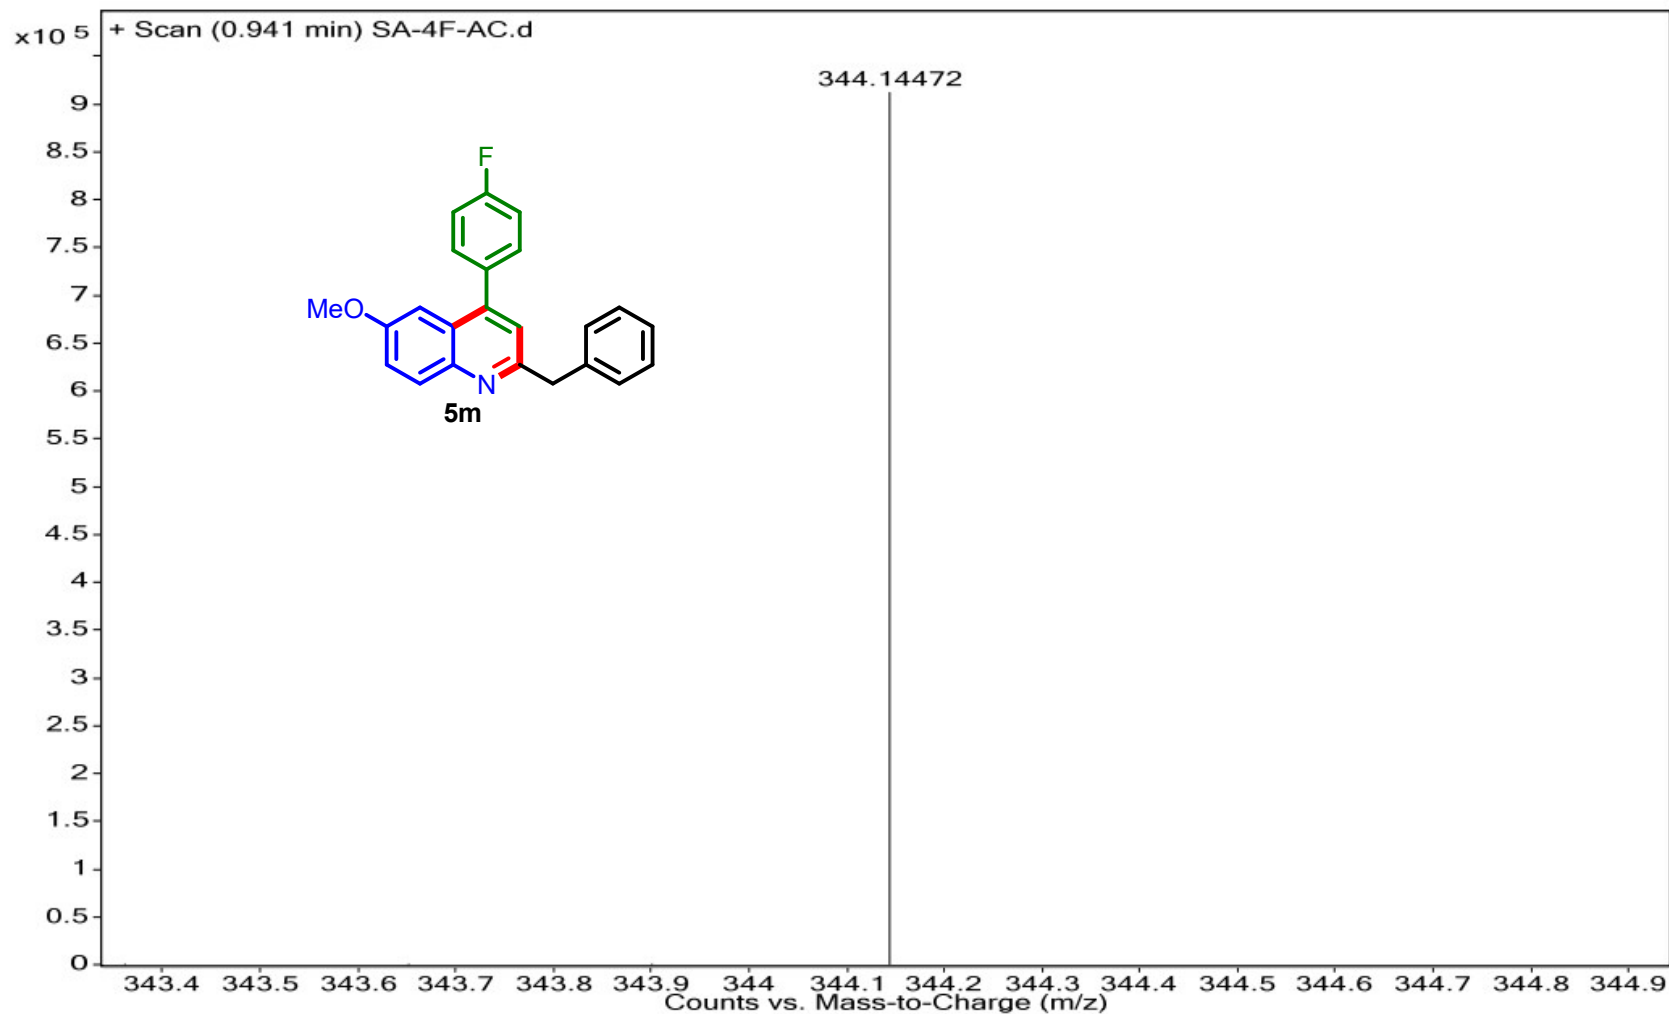



**<sup>1</sup>H NMR spectrum of compound: 5n**

SA-4OMe-ST-2CF3-AC

8.07  
8.06  
7.50  
7.49  
7.47  
7.45  
7.45  
7.35  
7.33  
7.31  
7.29  
7.28  
7.22  
7.21  
7.20  
7.15  
7.13  
— 4.34  
— 3.77

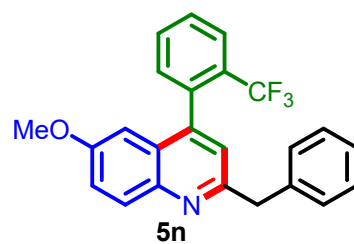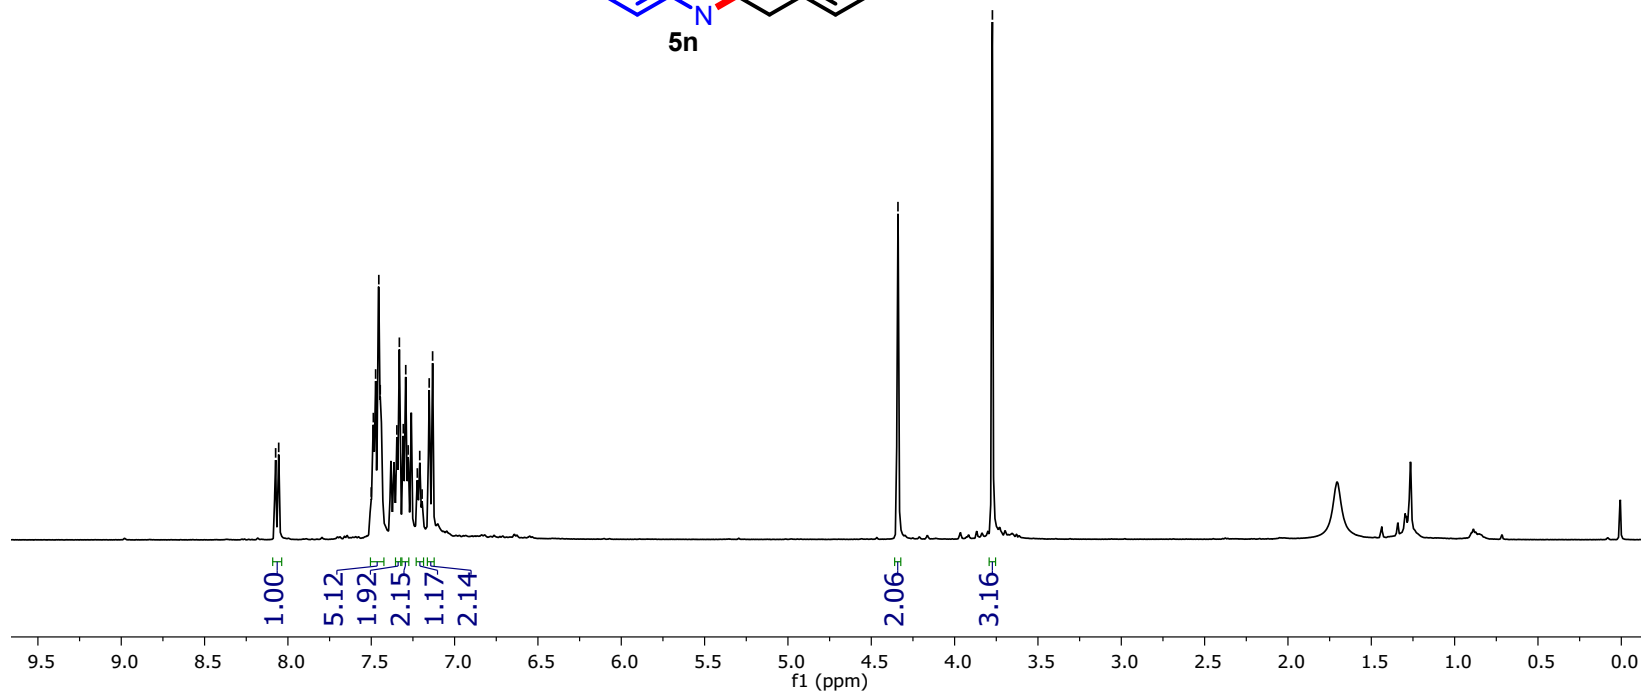

<sup>13</sup>C NMR spectrum of compound: 5n

SA-4OMe-ST-2CF3AC

158.43  
157.67  
147.85  
144.40  
139.58  
138.56  
130.88  
129.49  
129.37  
128.81  
128.79  
128.47  
126.62  
126.37  
122.27  
121.74  
— 103.96

77.44  
77.23  
77.02

— 55.63

— 45.43

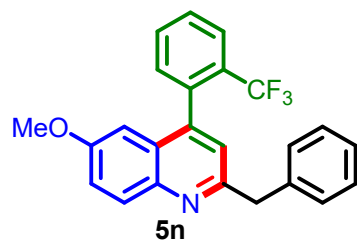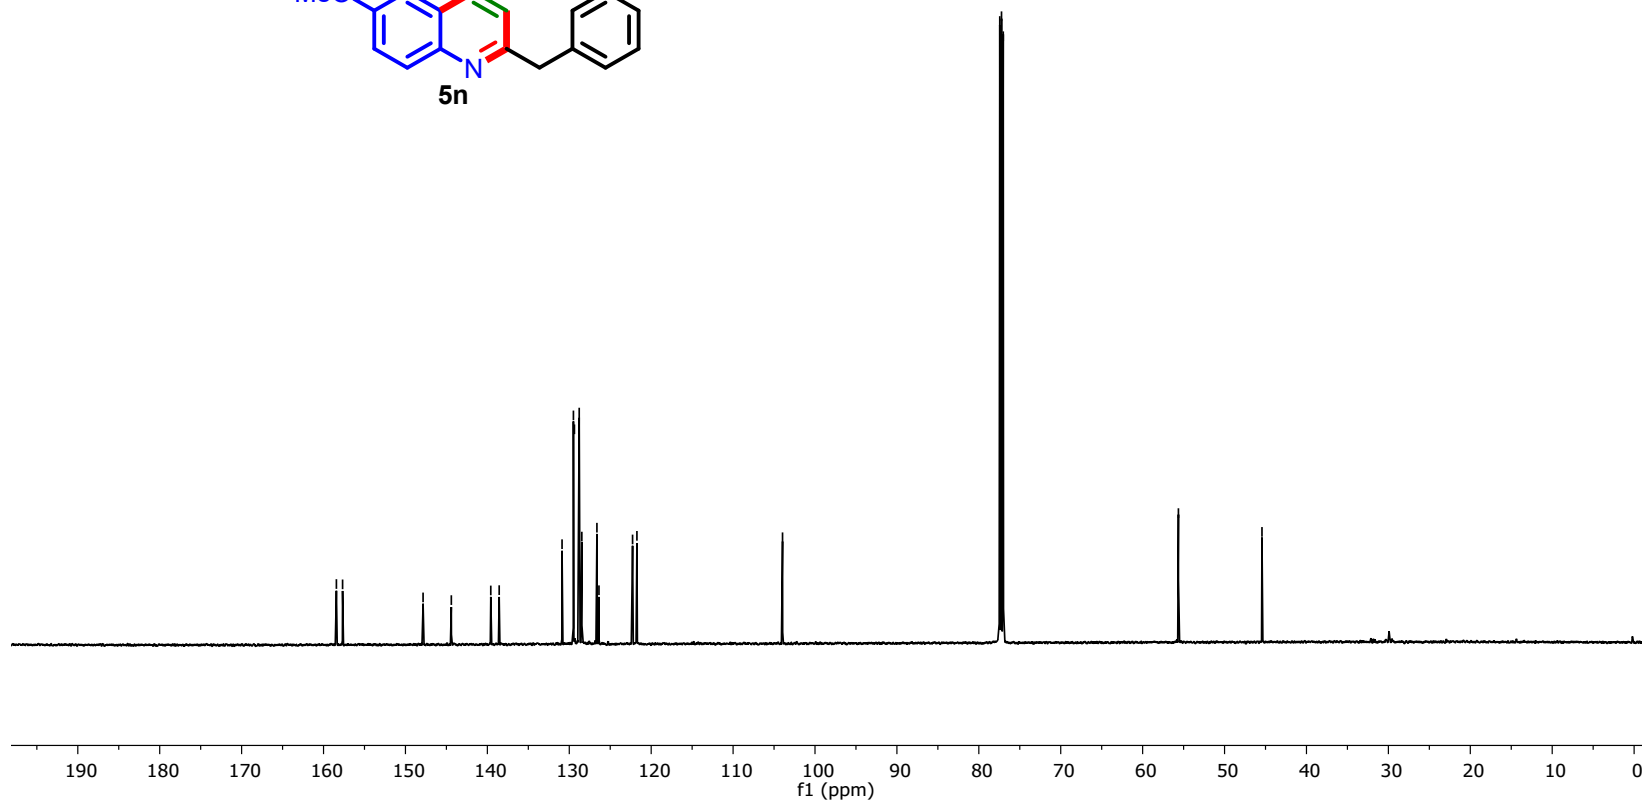

## HRMS spectrum of compound: 5n

|                    |                    |                               |         |                        |                                 |
|--------------------|--------------------|-------------------------------|---------|------------------------|---------------------------------|
| <b>Sample Name</b> | SAMPLE             | <b>Position</b>               | P1-C7   | <b>Instrument Name</b> | Instrument 1                    |
| <b>User Name</b>   |                    | <b>Inj Vol</b>                | 20      | <b>InjPosition</b>     |                                 |
| <b>Sample Type</b> | Sample             | <b>IRM Calibration Status</b> | Success | <b>Data Filename</b>   | SA-2CF3-3-R.d                   |
| <b>ACQ Method</b>  | ESI ALS 100-1000.m | <b>Comment</b>                |         | <b>Acquired Time</b>   | 05-08-2021 12:44:28 (UTC+05:30) |

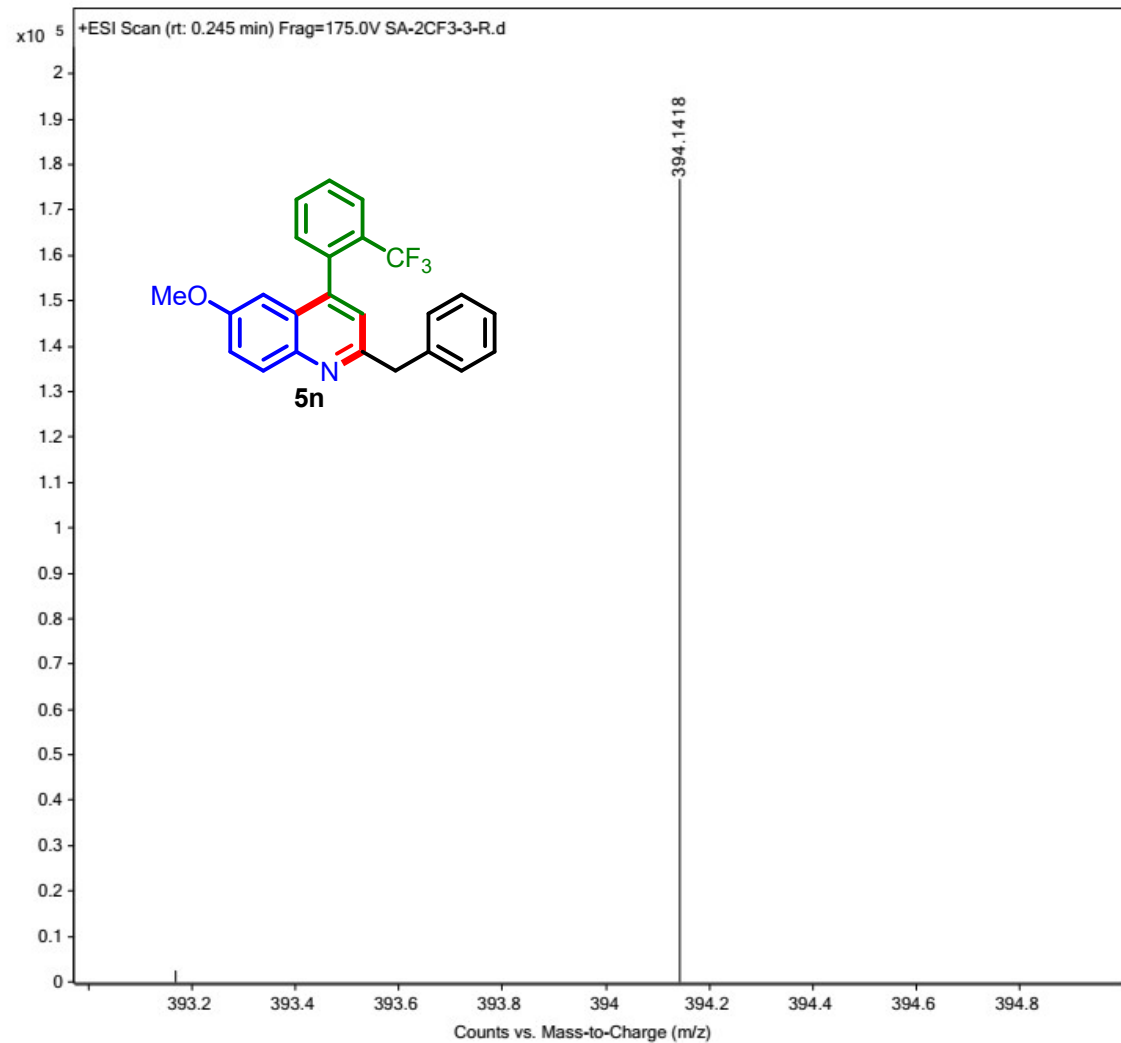

**<sup>1</sup>H NMR spectrum of compound: 7a'**

ATK-SA-4-OMe-1H

8.07  
8.05  
7.86  
7.40  
7.39  
7.39  
7.38  
7.37  
7.37  
7.21  
7.21  
7.20  
7.19  
7.12  
7.12  
7.11  
7.10  
7.10  
7.06  
7.05  
6.95  
6.93  
4.30  
3.93

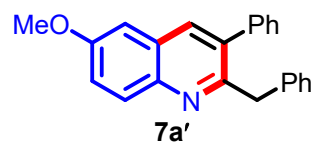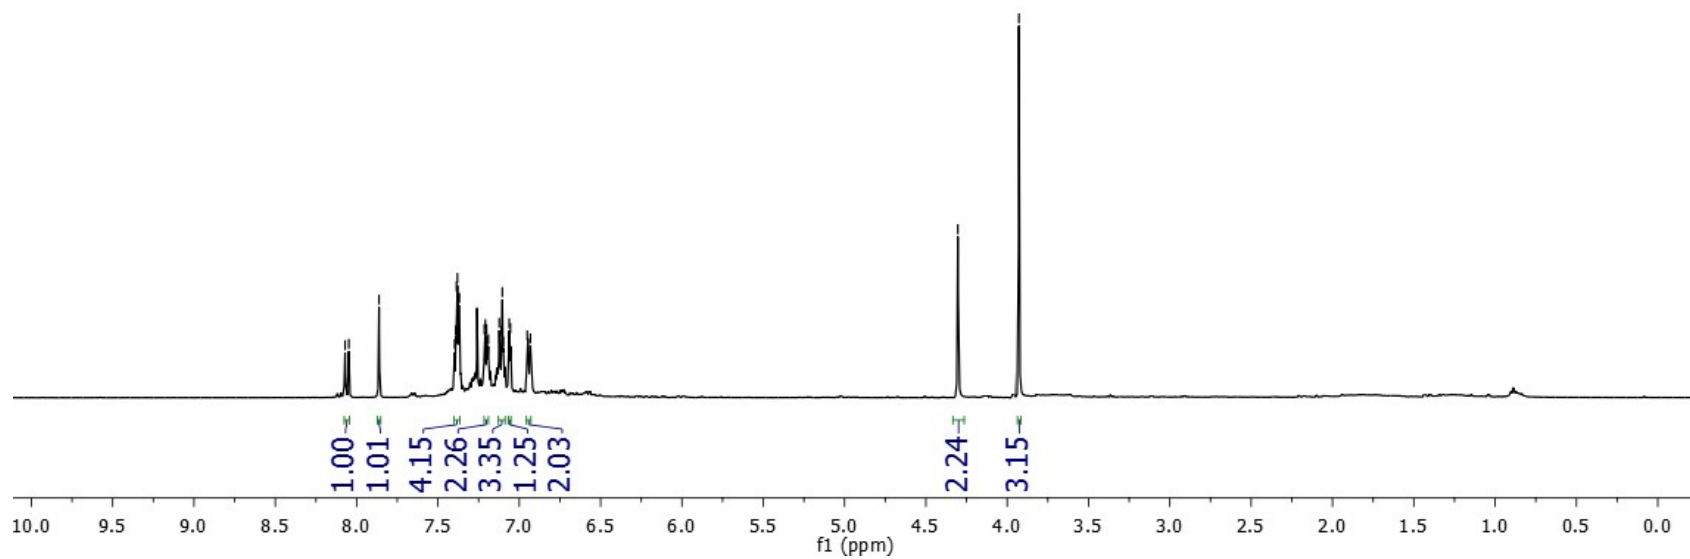

<sup>13</sup>C NMR spectrum of compound: 7a'

ATK-SA-4OMe-13C

157.92  
156.65  
143.42  
139.95  
139.79  
136.52  
136.07  
130.51  
129.61  
129.01  
128.37  
128.23  
128.03  
127.71  
126.02  
122.29  
— 105.08

77.55  
77.23  
76.91

— 55.79

— 42.65

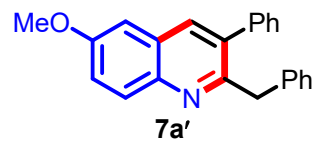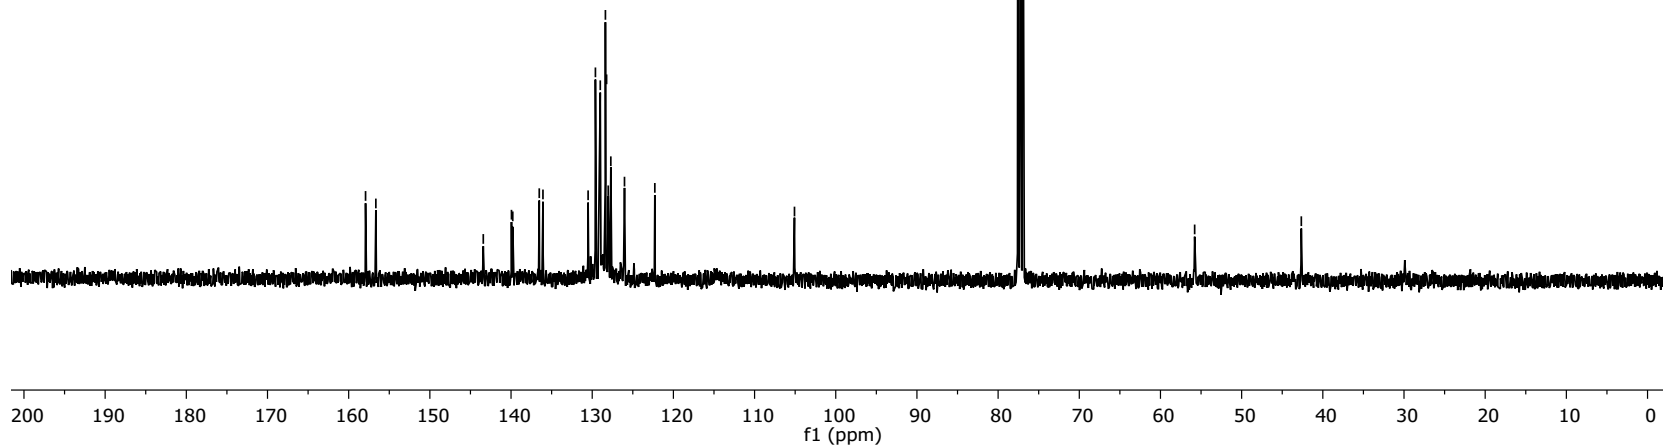

### HRMS spectrum of compound: 7a'

|               |               |             |                   |                 |              |                        |                       |
|---------------|---------------|-------------|-------------------|-----------------|--------------|------------------------|-----------------------|
| Sample Name   | SA-4-OME-21   | Position    | P1-B5             | Instrument Name | Instrument 1 | User Name              |                       |
| Inj Vol       | 20            | InjPosition |                   | SampleType      | Sample       | IRM Calibration Status | Success               |
| Data Filename | SA-4-OME-21.d | ACQ Method  | ESI ALS 100-500.m | Comment         |              | Acquired Time          | 17-9-2021 11:07:34 AM |

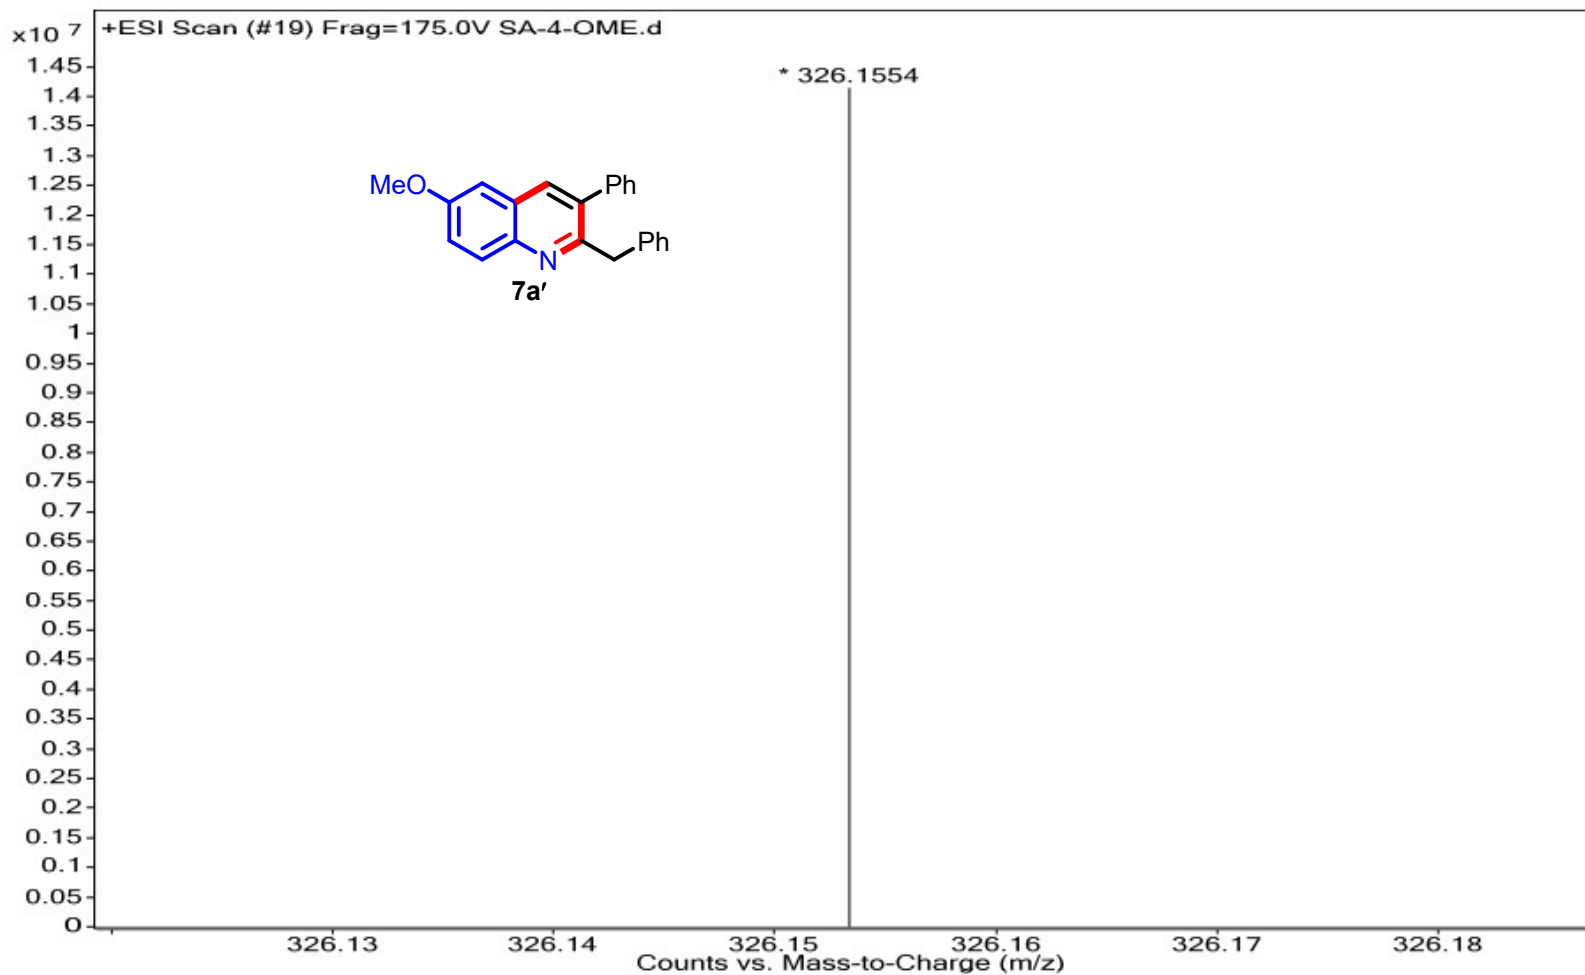

Supplement: d1ob01699g1.pdf [file d1ob01699g1.pdf]
